# Supplementary material
Source: PubMed Central journal article supplement (PMC5347480)
Supplement: NIHMS812045-supplement-1.pdf [file NIHMS812045-supplement-1.pdf]

Supplementary Materials for  
**Thioamide-directed enantioselective  $\alpha$ -C–H arylation of amines using  
palladium catalysts**

Pankaj Jain, Pritha Verma, Guoqin Xia, Jin-Quan Yu†

Corresponding author. Email: [yu200@scripps.edu](mailto:yu200@scripps.edu)

**This PDF file includes:**

Supplementary Text  
Tables 1 to 5  
NMR Spectra  
HPLC Spectra  
References

## Table of Contents

|                                                                   |     |
|-------------------------------------------------------------------|-----|
| General Information                                               | 3   |
| Optimization of reaction conditions for pyrrolidine (Table S1-S3) | 4   |
| Optimization of reaction conditions for piperidine (Table S4)     | 7   |
| Diarylation of pyrrolidine                                        | 8   |
| Proposed stereo-models for enantioselective induction             | 8   |
| Experimental section:                                             |     |
| Synthesis of directing group                                      | 9   |
| Preparation of substrates                                         | 10  |
| General procedure for enantioselective arylation                  | 15  |
| Removal of the directing group                                    | 42  |
| Application towards synthesis of CERC-501                         | 44  |
| HPLC Spectra                                                      | 46  |
| $^1\text{H}$ and $^{13}\text{C}$ NMR Spectra                      | 80  |
| References                                                        | 127 |

**General Information:** Solvents were obtained from Sigma-Aldrich, Alfa-Aesar and Acros and used directly without further purification. Anhydrous *t*-Amyl alcohol was obtained from sigma. Analytical thin layer chromatography was performed on 0.25 mm silica gel 60-F254. Visualization was carried out with UV light and Vogel's permanganate. <sup>1</sup>H NMR spectra were recorded on Bruker DRX-600 instrument (600 MHz). When the <sup>1</sup>H NMR solvent was CDCl<sub>3</sub>, chemical shifts were quoted in parts per million (ppm) referenced to 0.00 ppm for tetramethylsilane. The following abbreviations (or combinations thereof) were used to explain multiplicities: s = singlet, d = doublet, t = triplet, q = quartet, m = multiplet, br = broad. Coupling constants, *J*, were reported in Hertz unit (Hz). <sup>13</sup>C NMR spectra were recorded on Bruker DRX-600 instrument (150 MHz), and were fully decoupled by broad band proton decoupling. When the <sup>13</sup>C NMR solvent was CDCl<sub>3</sub>, chemical shifts were reported in ppm referenced to 77.00 ppm for chloroform-d. High-resolution mass spectra (HRMS) were recorded on an Agilent Mass spectrometer using ESI-TOF (electrospray ionization-time of flight). Enantiomeric ratios (er) were determined on a Hitachi LaChrom Elite HPLC system using commercially available chiral columns.

**Table 1: Screening of different directing groups with pyrrolidine substrate**

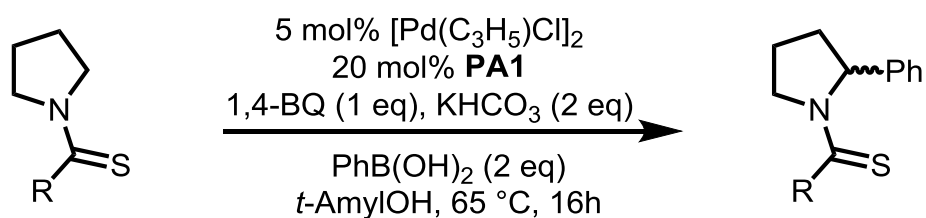

|     |     |                                                                 | % Conversion | er    |
|-----|-----|-----------------------------------------------------------------|--------------|-------|
| DG1 | R = | R' = Me                                                         | 36           | 55:45 |
| DG2 | R = | R' = Et                                                         | 38           | 67:33 |
| DG3 | R = |                                                                 | 24           | 53:47 |
| DG4 | R = | 2,6-F <sub>2</sub> -C <sub>6</sub> H <sub>3</sub>               | NR           | ND    |
| DG5 | R = | 2,4,6-Me <sub>3</sub> -C <sub>6</sub> H <sub>2</sub>            | 13           | ND    |
| DG6 | R = | 2,4,6- <i>i</i> -Pr <sub>3</sub> -C <sub>6</sub> H <sub>2</sub> | 40           | 74:26 |

The yields were determined by <sup>1</sup>H NMR analysis of the crude product using CH<sub>2</sub>Br<sub>2</sub> as an internal standard. Enantiomeric ratios (er) were determined by chiral high-performance liquid chromatography. N.R., no reaction. N.D., not determined.



**Table 2: Initial screening of different BINOL-derived phosphoric acids with pyrrolidine substrate**

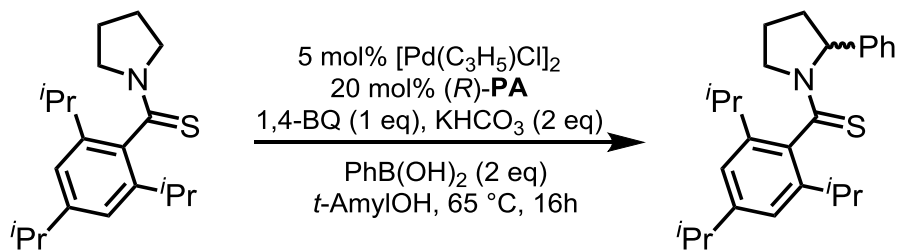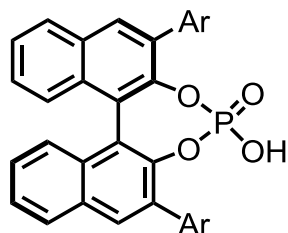

**(R)-PA**

- PA1:** Ar = 2,4,6-*i*-Pr<sub>3</sub>-C<sub>6</sub>H<sub>2</sub>  
40% yield, 26:74 er (*R*:*S*)
- PA2:** Ar = 9-anthrycenyl  
52% yield, 83:17 er (*R*:*S*)
- PA3:** Ar = 3,5-CF<sub>3</sub>-C<sub>6</sub>H<sub>2</sub>  
16% yield, 80:20 er (*R*:*S*)

The yields were determined by <sup>1</sup>H NMR analysis of the crude product using CH<sub>2</sub>Br<sub>2</sub> as an internal standard. Enantiomeric ratios (er) were determined by chiral high-performance liquid chromatography.

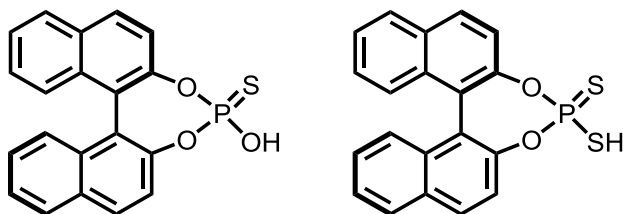

The use of thiophosphoric acid and dithiophosphoric acid as ligands under the reaction conditions show no product formation.

**Table 3: Screening of different palladium sources with pyrrolidine substrate:**

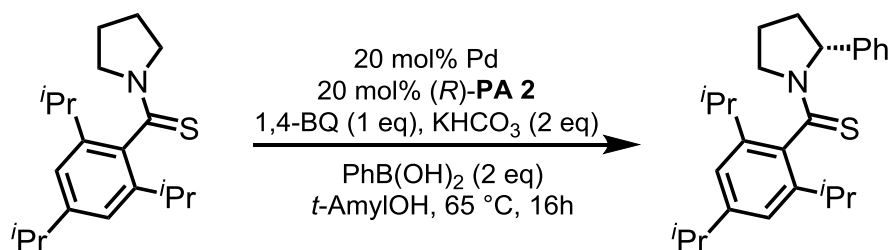

| Palladium source                                    | Yield | er (R:S) |
|-----------------------------------------------------|-------|----------|
| Pd(TFA) <sub>2</sub>                                | 83    | 50:50    |
| [Pd(C <sub>3</sub> H <sub>5</sub> )Cl] <sub>2</sub> | 52    | 83:17    |
| PdCl <sub>2</sub> (CH <sub>3</sub> CN) <sub>2</sub> | 53    | 70:30    |
| PdCl <sub>2</sub> (PhCN) <sub>2</sub>               | 60    | 81:19    |
| Pd(OAc) <sub>2</sub>                                | 92    | 90:10    |
| Pd <sub>2</sub> (dba) <sub>3</sub>                  | 87    | 98:2     |
| PdCl <sub>2</sub>                                   | 53    | 83:17    |
| Pd/C                                                | NR    | --       |

The yields were determined by <sup>1</sup>H NMR analysis of the crude product using CH<sub>2</sub>Br<sub>2</sub> as an internal standard. Enantiomeric ratios (er) were determined by chiral high-performance liquid chromatography.

**Note:** When the palladium loading was reduced to 10 mol % (with Pd<sub>2</sub>(dba)<sub>3</sub>) the er dropped from 98:2 to 96:4. However, carrying out the reaction under nitrogen and increasing the reaction concentration from 0.05 M to 0.2 M enabled the formation of product with 98:2 er.

**Table 4: Initial screening of different Binol-derived phosphoric acids with piperidine substrate**

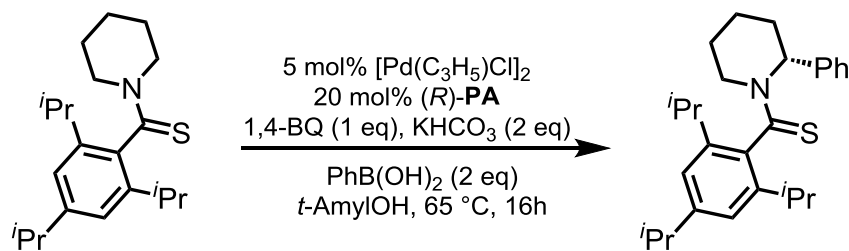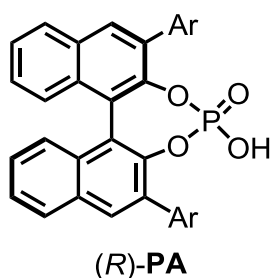

- PA1:** Ar = 2,4,6-*i*-Pr<sub>3</sub>-C<sub>6</sub>H<sub>2</sub>  
14% yield, 17:83 er (*R*:*S*)  
With Pd<sub>2</sub>(dba)<sub>3</sub> 24% yield, 17:83 er (*R*:*S*)
- PA2:** Ar = 9-anthrycenyl  
17% yield, 82:18 er (*R*:*S*)  
With Pd<sub>2</sub>(dba)<sub>3</sub> 24% yield, 92:8 er (*R*:*S*)
- PA3:** Ar = 3,5-(CF<sub>3</sub>)<sub>2</sub>-C<sub>6</sub>H<sub>2</sub>  
9% yield, 63:37 er (*R*:*S*)
- PA4:** Ar = α-naphthyl  
With Pd<sub>2</sub>(dba)<sub>3</sub> 25% yield, 85:15 er
- PA5:** Ar = 3,5-*t*-Bu<sub>2</sub>-C<sub>2</sub>H<sub>6</sub>  
With Pd<sub>2</sub>(dba)<sub>3</sub> 15% yield, 85:15 er

The yields were determined by <sup>1</sup>H NMR analysis of the crude product using CH<sub>2</sub>Br<sub>2</sub> as an internal standard. Enantiomeric ratios (er) were determined by chiral high-performance liquid chromatography.

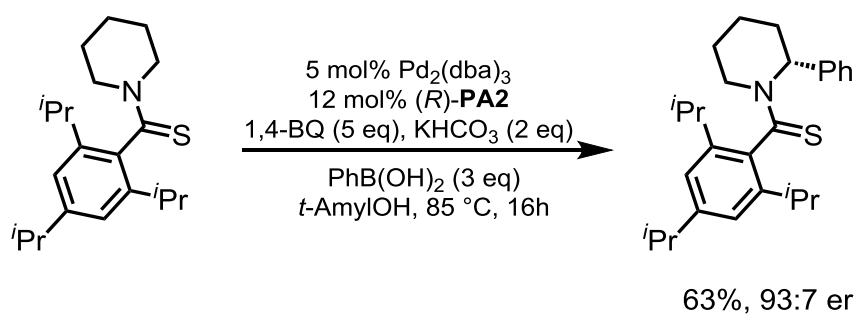

Increasing the reaction concentration from 0.05 M to 0.2 M enabled the formation of product with 95.5:4.5 er with similar yields.

**Table 5: Diarylation of Pyrrolidine**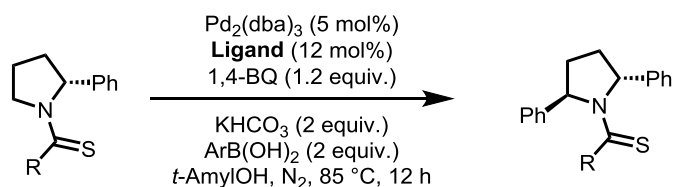

| Ligand           | Conversion % |
|------------------|--------------|
| ( <i>R</i> )-PA2 | 35           |
| ( <i>S</i> )-PA2 | <5           |
| BINOL-PA         | 85           |

To test if the diarylation reaction is substrate-controlled or catalyst-controlled, we used (*R*)-phenylpyrrolidine as the substrate and tested three different ligand systems: (*R*)-PA2, (*S*)-PA2 and the racemic BINOL phosphoric acid. The less hindered BINOL-PA shows high conversion, where as the (*R*)-PA2 gave 35% conversion. Interesting the (*S*)-PA2 gave less than 5% conversion. In all the cases only trans-product was obtained. Based on these results the stereochemistry of the second arylation is controlled by the substrate, however the catalyst geometry needs to match the substrate for it to be able to carry out the transformation. These results also show that kinetic resolution of racemic amines could be possible with chiral phosphoric acids.

### Proposed stereo-models for enantioselective induction

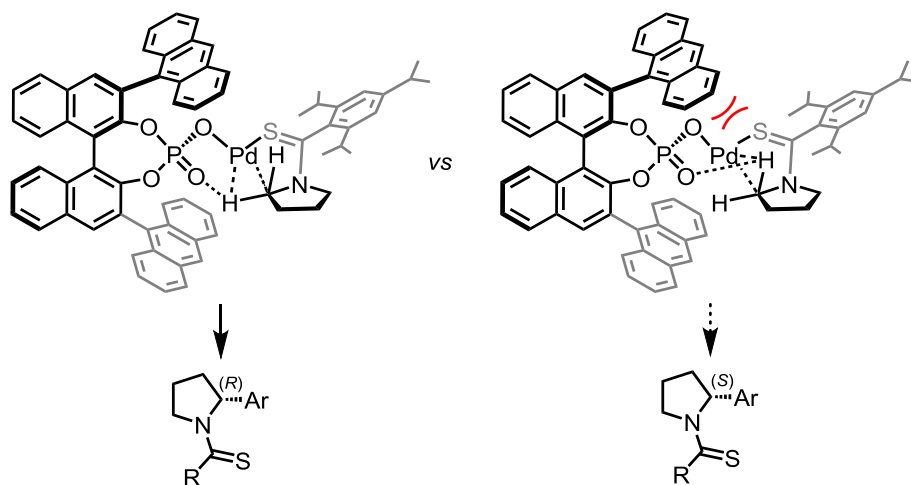

## Experimental Section

### Ligand Synthesis:

Chiral phosphoric acids were synthesized from known literature procedures<sup>1-3</sup> or obtained from commercial sources. The final step involving phosphorylation in all cases was carried out following Akiyama's procedure<sup>2</sup>. (*S*)-**PA2** was obtained from Sigma Aldrich (CAS-361342-52-1).

### Directing group:

#### Synthesis of 2,4,6-triisopropylbenzothioyl chloride.

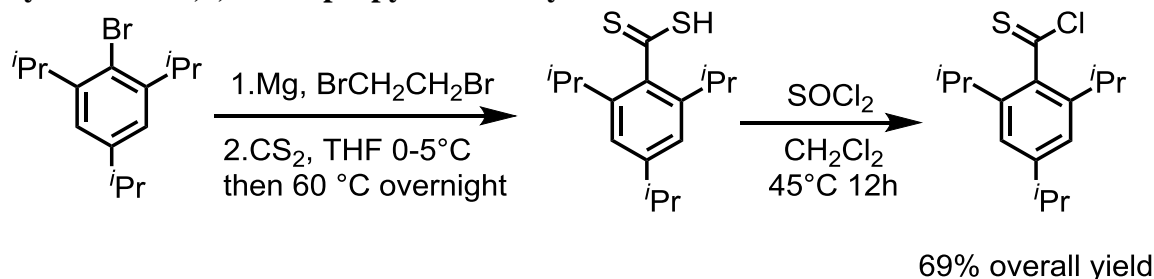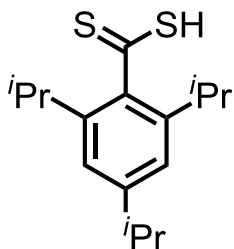

#### Synthesis of 2,4,6-triisopropylbenzodithioic acid.

The Grignard was synthesized using literature procedure<sup>4</sup>: 4.5 g (185 mmol) of Magnesium was added to a three neck round-bottom flask (flask 1) equipped with a addition funnel and reflux condenser. Then in a different flask (flask 2) 30 g of 2,4,6-triisopropylphenyl bromide (106 mmol) and 70 ml of ether were added. 10-15 ml of this solution from flask 2 was added to the flask 1. Then 0.2 ml of 1,2-dibromoethane was added to flask 1 and was heated to 40-45 °C. In about 10 min the magnesium was observed to be reacting, at this point remaining solution from flask 2 was added dropwise via the addition funnel. Once the addition was complete the reaction mixture was refluxed for 16 hrs.

Next day, 20 ml carbon disulfide and 20 ml of THF were taken in a round bottom flask under a nitrogen balloon and cooled to -5 to -10 °C. Then, the Grignard solution was added drop wise to the flask. After the addition was complete the solution was warmed to

room temperature and refluxed at 60 °C for 16 hrs. The resulting solution was quenched with 1M HCl and the organic layer separated. The aqueous layer was washed with ethyl acetate and the organic layers were combined. Then the solvent was removed on high vacuum and the residue was washed with cold hexanes giving the pure product in 76% yield (22.6 g) as pink solid. <sup>1</sup>H NMR (400 MHz, CDCl<sub>3</sub>) δ 6.99 (s, 2H), 6.74 (s, 1H), 3.27 (hept, *J* = 6.8 Hz, 2H), 2.88 (hept, *J* = 6.8 Hz, 1H), 1.38-1.10 (m, 18H). <sup>13</sup>C NMR (150 MHz, CDCl<sub>3</sub>) δ 149.43, 143.76, 142.19, 121.38, 34.24, 30.42, 24.75, 24.32, 23.92. HRMS (ESI-TOF) Calcd for C<sub>16</sub>H<sub>24</sub>ClS [M+H]<sup>+</sup>: 281.1392; found: 281.1394.

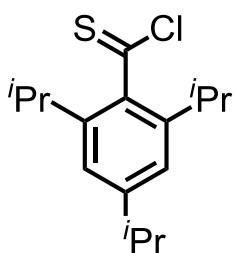

### Synthesis of 2,4,6-triisopropylbenzothioyl chloride

In a round bottom flask containing 10 ml of thionyl chloride and 30 ml of dichloromethane, 2,4,6-triisopropylbenzodithioic acid (10 g, 35 mmol) was added at once and the resulting solution was heated at 45 °C for 12 hrs. Then the solvent was removed on high vacuum and the residue was washed with cold hexanes giving the pure product in 91 % yield (9.1 g) as red solid. <sup>1</sup>H NMR (400 MHz, CDCl<sub>3</sub>) δ 7.00 (s, 2H), 3.20 (hept, *J* = 6.8 Hz, 2H), 2.89 (hept, *J* = 6.9 Hz, 1H), 1.31 (d, *J* = 6.8 Hz, 6H), 1.24 (s, 6H), 1.19 (d, *J* = 6.8 Hz, 6H). <sup>13</sup>C NMR (150 MHz, CDCl<sub>3</sub>) δ 212.69, 149.94, 143.94, 142.48, 121.26, 34.30, 30.77, 24.31, 23.87.

### Substrate Preparation: Installation of the directing group

**General procedure for the preparation of thioamides:** The amine (4 mmol) and triethylamine (12 mmol, 1.67 ml) were added to 50-ml dichloromethane in a round bottom flask and stirred for 5 min. Then the temperature was reduced to 0 °C and the 2,4,6-triisopropylbenzothioyl chloride (4 mmol, 1.13 g) was added in portions over 1 min. After the addition was complete the mixture was stirred at room temperature for 1-4 hours. Then the organic layer was washed with saturated NaHCO<sub>3</sub> solution. The organic

solvent was evaporated and the residue was purified on silica gel chromatography with ethyl acetate and hexanes (1:100 to 1:20) as the solvent.

Note: For non-symmetric amines the product sometimes appear as two spots on TLC due the restricted C-N thioamide bond rotation.

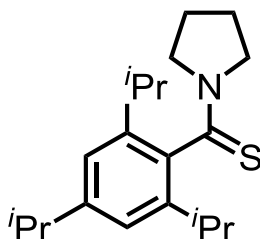

### **Pyrrolidin-1-yl(2,4,6-triisopropylphenyl)methanethione (1a)**

Following the general procedure for the preparation of thioamides, the title compound was obtained in 92% yield (1.16 g) as a colorless solid.  $^1\text{H}$  NMR (600 MHz,  $\text{CDCl}_3$ ):  $\delta$  6.97 (s, 2H), 4.00 (t,  $J = 7.3$  Hz, 2H), 3.23 (t,  $J = 6.8$  Hz, 2H), 2.90-2.79 (m, 3H), 2.09 (m, 2H), 1.94 (m, 2H), 1.25 (d,  $J = 6.8$  Hz, 6H), 1.23 (d,  $J = 6.9$  Hz, 6H), 1.20 (d,  $J = 6.9$  Hz, 6H).  $^{13}\text{C}$  NMR (150 MHz,  $\text{CDCl}_3$ )  $\delta$  197.52, 148.53, 141.84, 138.63, 121.46, 52.90, 51.86, 34.20, 30.66, 26.10, 25.04, 24.63, 23.99, 23.57. HRMS (ESI-TOF) Calcd for  $\text{C}_{20}\text{H}_{32}\text{NS}$   $[\text{M}+\text{H}]^+$ : 318.2250; found:318.2246.

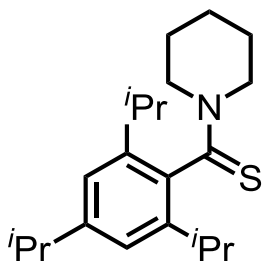

### **Piperidin-1-yl(2,4,6-triisopropylphenyl)methanethione (1b)**

Following the general procedure for the preparation of thioamides, the title compound was obtained in 83% yield (1.1 g) as a colorless solid.  $^1\text{H}$  NMR (600 MHz,  $\text{CDCl}_3$ ):  $\delta$  6.95 (s, 2H), 4.45-4.39 (m, 2H), 3.43-3.39 (m, 2H), 2.84 (hept,  $J = 6.9$  Hz, 3H), 1.83-1.77 (m, 2H), 1.74-1.68 (m, 2H), 1.57-1.51 (m, 2H), 1.26 (d,  $J = 6.7$  Hz, 6H), 1.23 (d,  $J = 6.9$  Hz, 6H), 1.19 (d,  $J = 6.9$  Hz, 6H).  $^{13}\text{C}$  NMR (150 MHz,  $\text{CDCl}_3$ )  $\delta$  199.32, 148.27, 141.99, 137.28, 121.44, 51.99, 48.93, 34.15, 30.66, 26.25, 25.52, 25.11, 24.09, 23.99, 23.66. HRMS (ESI-TOF) Calcd for  $\text{C}_{21}\text{H}_{34}\text{NS}$   $[\text{M}+\text{H}]^+$ : 332.2406; found: 332.2400.

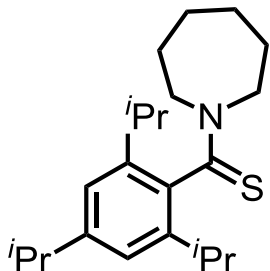

**Azepan-1-yl(2,4,6-triisopropylphenyl)methanethione (1c)**

Following the general procedure for the preparation of thioamides, the title compound was obtained in 86% (1.18 g) yield as a colorless solid.  $^1\text{H}$  NMR (600 MHz,  $\text{CDCl}_3$ )  $\delta$  6.95 (s, 2H), 4.30-4.25 (m, 2H), 3.49-3.45 (m, 2H), 2.89-2.76 (m, 3H), 2.02-1.95 (m, 2H), 1.74-1.64 (m, 4H), 1.62-1.57 (m, 2H), 1.26 (d,  $J = 6.7$  Hz, 6H), 1.23 (d,  $J = 6.9$  Hz, 6H), 1.21 (d,  $J = 6.9$  Hz, 6H).  $^{13}\text{C}$  NMR (150 MHz,  $\text{CDCl}_3$ )  $\delta$  200.39, 148.26, 141.90, 137.77, 121.48, 53.62, 51.90, 34.14, 30.73, 28.64, 28.34, 26.28, 26.11, 25.26, 23.98, 23.51. HRMS (ESI-TOF) Calcd for  $\text{C}_{22}\text{H}_{36}\text{NS}$   $[\text{M}+\text{H}]^+$ : 346.2563; found: 346.2564.

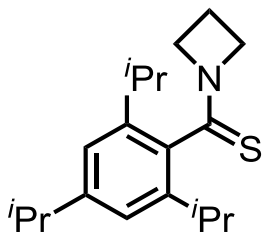

**Azetidin-1-yl(2,4,6-triisopropylphenyl)methanethione (1d)**

Following the general procedure for the preparation of thioamides, the title compound was obtained in 90% yield (1.09 g) as a colorless solid.  $^1\text{H}$  NMR (600 MHz,  $\text{CDCl}_3$ )  $\delta$  6.97 (s, 2H), 4.41 (t,  $J = 8.0$  Hz, 2H), 3.84 (t,  $J = 7.7$  Hz, 2H), 2.94 (hept,  $J = 6.8$  Hz, 2H), 2.86 (hept,  $J = 6.9$  Hz, 1H), 2.36-2.26 (m, 2H), 1.26-1.20 (m, 18H).  $^{13}\text{C}$  NMR (150 MHz,  $\text{CDCl}_3$ )  $\delta$  198.70, 148.99, 143.00, 134.53, 121.34, 54.10, 52.85, 34.22, 30.68, 25.13, 23.95, 23.86, 14.08. HRMS (ESI-TOF) Calcd for  $\text{C}_{19}\text{H}_{30}\text{NS}$   $[\text{M}+\text{H}]^+$ : 304.2093; found: 304.2097.



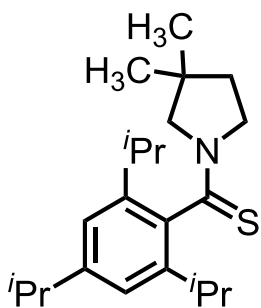

**(3,3-dimethylpyrrolidin-1-yl)(2,4,6-triisopropylphenyl)methanethione (1e)**

Following the general procedure for the preparation of thioamides, the title compound was obtained in 88% yield (1.20 g) as a colorless solid.  $^1\text{H}$  NMR (600 MHz,  $\text{CDCl}_3$ ) (57:43 mixture of rotamers, peaks corresponding to minor rotamer starred):  $\delta$  6.98-6.96 (m, 2H), 4.05 (t,  $J = 7.4$  Hz, 1.14H), 3.80 (s, 0.86H)\*, 3.29 (t,  $J = 7.2$  Hz, 0.86H)\*, 2.99 (s, 1.14H), 2.90-2.76 (m, 3H), 1.87 (t,  $J = 7.4$  Hz, 1.14H), 1.77 (t,  $J = 7.2$  Hz, 0.86H)\*, 1.32-1.19 (m, 18H), 1.17 (s, 2.58H)\*, 1.07 (s, 3.42H).  $^{13}\text{C}$  NMR (150 MHz,  $\text{CDCl}_3$ )  $\delta$  197.95\*, 197.75, 148.48\*, 148.46, 141.79, 141.72\*, 138.35, 138.18\*, 121.36, 64.82, 64.37\*, 51.69\*, 51.11, 39.42, 38.99, 38.13, 37.40, 34.11\*, 34.07, 30.67, 30.63\*, 26.19, 25.53, 25.21, 25.08, 23.92, 23.90, 23.41. HRMS (ESI-TOF) Calcd for  $\text{C}_{22}\text{H}_{36}\text{NS}$   $[\text{M}+\text{H}]^+$ : 346.2563; found: 346.2563.

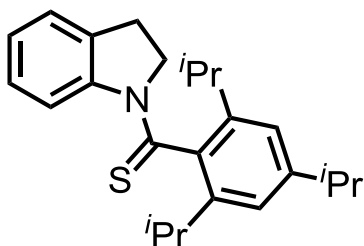

**Indolin-1-yl(2,4,6-triisopropylphenyl)methanethione (1f)**

Following the general procedure for the preparation of thioamides, the title compound was obtained in 82% yield (1.19 g).  $^1\text{H}$  NMR (600 MHz,  $\text{CDCl}_3$ )  $\delta$  7.21 (d,  $J = 7.5$  Hz, 1H), 7.00 (s, 2H), 6.93 (t,  $J = 7.8$  Hz, 1H), 6.75 (t,  $J = 7.9$  Hz, 1H), 5.58 (d,  $J = 6$  Hz, 1H), 4.75-4.68 (m, 2H), 3.21 (t, 2H), 2.98-2.85 (m, 3H), 1.32-1.18 (m, 12H), 0.93 (d,  $J = 7.0$  Hz, 6H).  $^{13}\text{C}$  NMR (150 MHz,  $\text{CDCl}_3$ )  $\delta$  196.55, 149.33, 142.39, 142.13, 138.06, 135.03, 127.03, 125.73, 124.68, 121.80, 116.73, 54.39, 34.21, 30.65, 26.04, 24.67, 24.02, 23.27. HRMS (ESI-TOF) Calcd for  $\text{C}_{24}\text{H}_{32}\text{NS}$   $[\text{M}+\text{H}]^+$ : 366.2250; found: 366.2250.

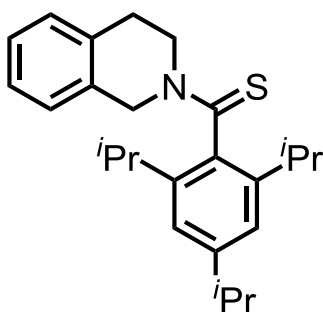

**(3,4-dihydroisoquinolin-2(1H)-yl)(2,4,6-triisopropylphenyl)methanethione (1g)**

Following the general procedure for the preparation of thioamides, the title compound was obtained in 85% yield (1.28 g). <sup>1</sup>H NMR (600 MHz, CDCl<sub>3</sub>) (93:7 mixture of rotamers, peaks corresponding to minor rotamer starred) δ 7.35-7.29 (m, 0.14H)\*, 7.28-7.22 (m, 1.86H), 7.20-7.14 (m, 1H), 7.04 (s, 0.14H)\*, 7.01 (s, 1.86), 6.94-6.89 (m, 0.93H), 4.64-4.59 (m, 1.86H), 4.56 (s, 1.86H), 3.77-3.67 (m, 0.14H)\*, 3.15 (t, *J* = 6.1 Hz, 1.86H), 2.95-2.77 (m, 3.14H), 1.31-1.21 (m, 12.42H), 1.04 (d, *J* = 6.9 Hz, 5.58H). <sup>13</sup>C NMR (150 MHz, CDCl<sub>3</sub>) δ 200.27, 199.83, 148.63, 142.41, 142.20, 137.22, 137.20, 134.67, 133.42, 132.27, 132.07, 128.50, 128.11, 127.35, 126.52, 125.87, 121.54, 52.84, 51.01, 48.74, 47.13, 34.16, 30.77, 30.55, 29.38, 28.02, 25.00, 24.84, 23.96, 23.60, 23.47. HRMS (ESI-TOF) Calcd for C<sub>25</sub>H<sub>34</sub>NS [M+H]<sup>+</sup>: 380.2406; found: 380.2399.

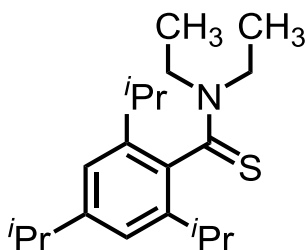

***N,N*-diethyl-2,4,6-triisopropylbenzothioamide (1h)** Following the general procedure for the preparation of thioamides, the title compound was obtained in 82% yield (1.04 g). <sup>1</sup>H NMR (600 MHz, CDCl<sub>3</sub>) δ 6.95 (s, 2H), 4.21 (q, *J* = 7.1 Hz, 2H), 3.40 (q, *J* = 7.2 Hz, 2H), 2.89-2.78 (m, 3H), 1.40 (t, *J* = 7.1 Hz, 3H), 1.26 (d, *J* = 6.7 Hz, 6H), 1.23 (d, *J* = 6.9 Hz, 6H), 1.20 (d, *J* = 6.9 Hz, 6H), 1.14 (t, *J* = 7.2 Hz, 3H). <sup>13</sup>C NMR (150 MHz, CDCl<sub>3</sub>) δ 199.87, 148.28, 142.01, 137.41, 121.41, 46.97, 44.26, 34.15, 30.50, 25.25, 23.99, 23.35, 12.99, 10.76. HRMS (ESI-TOF) Calcd for C<sub>20</sub>H<sub>34</sub>NS [M+H]<sup>+</sup>: 320.2406; found: 320.2406.

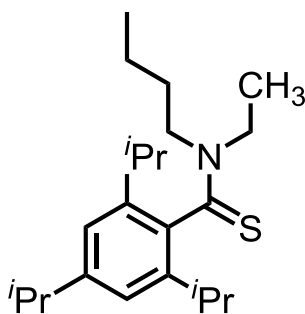

***N*-Butyl-*N*-ethyl-2,4,6-triisopropylbenzothioamide (1i)**

Following the general procedure for the preparation of thioamides, the title compound was obtained in 79% yield (1.09 g).  $^1\text{H}$  NMR (600 MHz,  $\text{CDCl}_3$ ) (84:16 mixture of rotamers, peaks corresponding to minor rotamer starred)  $\delta$  6.95-6.93 (m, 2H), 4.21 (q,  $J = 7.1$  Hz, 1.84H), 4.13-4.09 (m, 0.16H)\*, 3.43-3.37 (m, 0.16H)\*, 3.27-3.21 (m, 1.84H), 2.89-2.76 (m, 3H), 1.88-1.82 (m, 0.16H)\*, 1.54-1.47 (m, 2.08H), 1.47-1.42 (m, 0.16H)\*, 1.39 (t,  $J = 7.1$  Hz, 2.76H), 1.28-1.18 (m, 18H), 1.16-1.08 (m, 2H), 1.02 (t,  $J = 7.4$  Hz, 0.24H)\*, 0.77 (t,  $J = 7.4$  Hz, 2.76H).  $^{13}\text{C}$  NMR (150 MHz,  $\text{CDCl}_3$ )  $\delta$  199.90, 148.34, 141.99, 137.32, (121.42), 121.33, 77.21, 77.00, 76.79, 52.39, 49.46\*, 47.45\*, 45.19, 34.18, 30.53, 29.76, 27.35\*, 25.38, 25.25\*, 24.00, 23.37\*, 23.22, 20.44, 20.10, 13.79\*, 13.44, 12.97\*, 10.75. HRMS (ESI-TOF) Calcd for  $\text{C}_{22}\text{H}_{38}\text{NS}$   $[\text{M}+\text{H}]^+$ : 348.2719; found: 348.2719.

**General Procedure for enantioselective arylation:** To a reaction vial with a magnetic stir bar was added the thioamide (0.2 mmol, 1.0 eq), potassium bicarbonate (40 mg, 0.4 mmol, 2.0 eq), arylboronic acid (0.4 mmol, 2.0 equiv. unless otherwise noted), 1,4-benzoquinone (23.8 mg, 0.2 mmol, 1.1 equiv., unless otherwise noted), chiral phosphoric acid (0.024 mmol, 0.12 eq) Tris(dibenzylideneacetone)dipalladium(0) (9.15 mg, 0.01 mmol, 0.05 eq). Then the reaction tube was connected to vacuum and backfilled with nitrogen three times. Then 1 ml of anhydrous 2-methyl-2-butanol was added and stirred rapidly at 65 °C for 16 hours. The reaction was then cooled to room temperature and the mixture was passed through a pad of celite. After the celite was washed with ethyl acetate, the combined organic layers were concentrated under vacuum. The crude residue was purified by preparative TLC with ethyl acetate and hexanes (1:20) as eluent.

Note: The products usually appear as two spots due to the restricted C-N thioamide bond rotation.

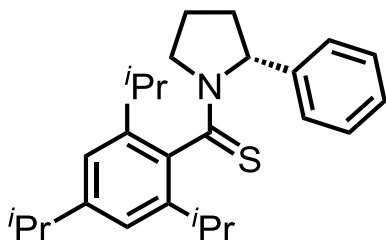

**(*R*)-(2-phenylpyrrolidin-1-yl)(2,4,6-triisopropylphenyl)methanethione (**2a**)**

Following the general procedure for the enantioselective arylation, the title compound was obtained in 84% yield (66 mg). The er value was determined by HPLC analysis on a Chiralcel OD-H column (5% isopropanol in hexanes, 0.5 mL/min) with  $t_r = 7.87$  min (minor), 8.63 min (major): 98:2 er.

$^1\text{H}$  NMR (600 MHz,  $\text{CDCl}_3$ ) (60:40 mixture of rotamers, peaks corresponding to minor rotamer starred)  $\delta$  7.38-7.34 (m, 0.8H)\*, 7.29-7.25 (m, 1.2H), 7.23-7.16 (m, 1.8H), 6.99-6.97 (m, 0.8H)\*, 6.96 (d,  $J = 1.7$  Hz, 0.6H), 6.87-6.83 (m, 1.2H), 6.68 (d,  $J = 1.7$  Hz, 0.6H), 5.90 (dd,  $J = 8.4, 3.5$  Hz, 0.4H)\*, 4.86 (d,  $J = 6.7$  Hz, 0.6H), 4.33-4.22 (m, 1.2H), 3.57-3.46 (m, 0.8H)\*, 2.96 (hept,  $J = 6.8$  Hz, 0.4H)\*, 2.92-2.83 (m, 0.8H)\*, 2.79 (h,  $J = 6.9$  Hz, 0.6H), 2.65 (hept,  $J = 6.8$  Hz, 0.6H), 2.53-2.44 (m, 1H), 2.28-2.01 (m, 2.6H), 1.97-1.89 (m, 0.4H)\*, 1.85-1.78 (m, 0.6H), 1.33 (d,  $J = 6.9$  Hz, 1.8H), 1.30 (d,  $J = 7.0$  Hz, 1.2H)\*, 1.28-1.25 (m, 2.6H), 1.25-1.22 (m, 4H), 1.20-1.17 (m, 3.6H), 1.14 (d,  $J = 6.7$  Hz, 1.2H)\*, 1.10 (d,  $J = 6.7$  Hz, 1.8H), 0.10 (d,  $J = 6.8$  Hz, 1.8H).  $^{13}\text{C}$  NMR (150 MHz,  $\text{CDCl}_3$ )  $\delta$  199.74, 199.17\*, 148.55\*, 148.51, 143.61, 142.57, 142.01, 141.33, 141.27\*, 141.08, 138.53\*, 137.96, 128.54, 128.45\*, 127.27, 127.02\*, 126.08\*, 125.58, 121.66\*, 121.41, 120.77, 66.79, 66.03\*, 53.98\*, 53.20, 34.82, 34.56\*, 34.19\*, 34.12, 31.32, 30.82\*, 30.57, 30.13\*, 25.71, 25.62, 25.26, 24.62, 24.01\*, 23.98, 23.92, 23.78\*, 23.29\*, 23.19, 21.45, 21.36. HRMS (ESI-TOF) Calcd for  $\text{C}_{26}\text{H}_{36}\text{NS}$   $[\text{M}+\text{H}]^+$ : 394.2563; found: 394.2556.

The absolute stereochemistry was assigned by comparison of the HPLC data with the commercially available (*R*)-2-phenyl pyrrolidine (CAS: 56523-47-8 from Astatech) after installation of the directing group. The HPLC data was also compared after removal of the directing group from **2a** followed by Boc protection with the commercial material.

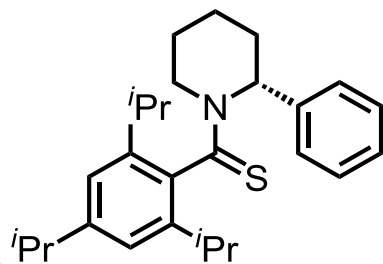

**(R)-(2-phenylpiperidin-1-yl)(2,4,6-triisopropylphenyl)methanethione (2b)**

Following the general procedure for the enantioselective arylation with 3 equiv. of phenyl boronic acid, 5 equiv. of 1,4-BQ at 85°C, the title compound was obtained in 62% yield (50.4 mg). The er value was determined by HPLC analysis on a Chiralcel AD-H column (5% isopropanol in hexanes, 0.5 mL/min) with  $t_r = 11.52$  min (major), 18.613 min (minor): 95.5:4.5 er.  $^1\text{H}$  NMR (600 MHz,  $\text{CDCl}_3$ )  $\delta$  7.48-7.44 (m, 2H), 7.44-7.37 (m, 3H), 7.32-7.28 (m, 1H), 6.99 (dd,  $J = 15.5, 1.6$  Hz, 2H), 3.74 (d,  $J = 12.9$  Hz, 1H), 3.14-2.98 (m, 3H), 2.87 (p,  $J = 6.9$  Hz, 1H), 2.57 (dd,  $J = 14.6, 2.8$  Hz, 1H), 1.85-1.71 (m, 2H), 1.57-1.50 (m, 2H), 1.37-1.17 (m, 16H), 1.14 (d,  $J = 7.0$  Hz, 3H).  $^{13}\text{C}$  NMR (150 MHz,  $\text{CDCl}_3$ )  $\delta$  201.04, 148.39, 142.26, 141.96, 137.98, 137.10, 128.72, 127.10, 126.94, 121.62, 57.23, 47.71, 34.14, 30.83, 30.62, 27.36, 26.08, 25.80, 24.55, 23.98, 23.64, 23.49, 19.24. HRMS (ESI-TOF) Calcd for  $\text{C}_{27}\text{H}_{38}\text{NS}$   $[\text{M}+\text{H}]^+$ : 408.2719; found: 408.2719.

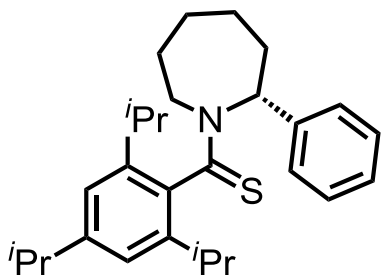

**(R)-(2-phenylazepan-1-yl)(2,4,6-triisopropylphenyl)methanethione (2c)**

Following the general procedure for the enantioselective arylation with 2 equiv. of 1,4-BQ, the title compound was obtained in 54% yield (45.4 mg). The er value was determined by HPLC analysis on two Chiralcel IC columns attached one after the other (5% isopropanol in hexanes, 0.5 mL/min) with  $t_r = 17.58$  min (minor), 18.63 min and 19.62 min (major): 98.5:1.5 er.  $^1\text{H}$  NMR (600 MHz,  $\text{CDCl}_3$ ) (88:12 mixture of rotamers, peaks corresponding to minor rotamer starred)  $\delta$  7.46-7.43 (m, 1.76H), 7.37-7.33 (m, 1.76H), 7.29-7.25 (m, 0.88H), 7.22-7.14 (m, 0.36H)\*, 6.97 (dd,  $J = 1.8, 0.5$  Hz, 0.88H), 6.96 (d,  $J = 1.4$  Hz, 0.12H)\*, 6.89 (dd,  $J = 1.8, 0.5$  Hz, 0.88H), 6.82-6.79 (m, 0.24H)\*,

6.68 (d,  $J = 1.7$  Hz, 0.12H)\*, 6.65 (dd,  $J = 11.5, 5.6$  Hz, 0.88H), 5.57 (dd,  $J = 13.0, 5.2$  Hz, 0.12H)\*, 4.83 (dd,  $J = 11.6, 6.0$  Hz, 0.12H)\*, 3.92 (ddd,  $J = 14.1, 5.1, 3.1$  Hz, 0.88H), 3.72-3.65 (m, 0.12H)\*, 3.58 (ddd,  $J = 14.1, 11.1, 2.2$  Hz, 0.88H), 3.04 (hept,  $J = 6.7$  Hz, 0.88H), 2.93 (hept,  $J = 7.0$  Hz, 0.12H)\*, 2.89-2.79 (m, 1.00H), 2.45 (hept,  $J = 6.8$  Hz, 0.88H), 2.41-2.31 (m, 1.00H), 2.18-2.10 (m, 0.12H)\*, 2.06-1.90 (m, 2.12H), 1.87-1.80 (m, 0.88H), 1.62-1.48 (m, 3.12H), 1.46-1.37 (m, 1.00H), 1.36 (d,  $J = 6.9$  Hz, 0.36H)\*, 1.31 (dd,  $J = 6.8, 1.5$  Hz, 5.28H), 1.29 (d,  $J = 6.7$  Hz, 0.36H)\*, 1.23 (d,  $J = 6.9$  Hz, 5.28H), 1.21 (dd,  $J = 6.9, 1.6$  Hz, 0.72H)\*, 1.13 (d,  $J = 6.9$  Hz, 2.64H), 1.05 (d,  $J = 6.7$  Hz, 0.36H)\*, 0.95 (d,  $J = 6.7$  Hz, 2.64H), 0.02 (d,  $J = 6.7$  Hz, 0.36H)\*.  $^{13}\text{C}$  NMR (150 MHz,  $\text{CDCl}_3$ ) (mixture of rotamers, peaks corresponding to minor rotamer starred)  $\delta$  202.5\*, 202.4, 148.4\*, 148.2, 143.1\*, 142.3, 142.1\*, 141.8, 141.5, 141.2\*, 137.6, 136.9\*, 128.7\*, 128.1, 127.1\*, 127.1, 125.5\*, 121.7, 121.5\*, 121.3, 120.7\*, 66.6\*, 64.4, 50.2, 50.2\*, 39.3\*, 35.8, 34.1\*, 34.1, 31.6, 31.3\*, 30.5\*, 29.7, 29.6\*, 28.6, 27.0\*, 26.0, 25.9\*, 25.9, 25.7\*, 25.4\*, 24.8, 24.1\*, 24.0, 23.9, 23.3\*, 22.9, 22.8, 20.8\*. HRMS (ESI-TOF) Calcd for  $\text{C}_{28}\text{H}_{40}\text{NS}$   $[\text{M}+\text{H}]^+$ : 422.2876; found: 422.2882.

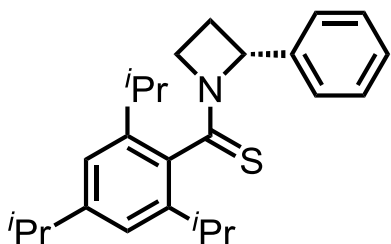

**(*R*)-(2-phenylazetid-1-yl)(2,4,6-triisopropylphenyl)methanethione ( $2\text{d}_{\text{mono}}$ )**

Following the general procedure for the enantioselective arylation, the title compound was obtained in 40% yield (30.3 mg). The er value was determined by HPLC analysis on a Chiralcel OD-H column (5% isopropanol in hexanes, 0.5 mL/min) with  $t_r = 8.813$  min (minor), 9.253 min (major): 98:2 er.  $^1\text{H}$  NMR (600 MHz,  $\text{CDCl}_3$ ) (69:31 mixture of rotamers, peaks corresponding to minor rotamer starred)  $\delta$  7.47-7.39 (m, 1.31H), 7.35-7.31 (m, 0.31H)\*, 7.19-7.10 (m, 2.07H), 7.00-6.97 (m, 1.31H), 6.80-6.77 (m, 1.31H), 6.59 (d,  $J = 1.6$  Hz, 0.69H), 5.78-5.71 (m, 0.31H)\*, 4.96-4.90 (m, 0.69H), 4.58-4.48 (m, 1.31H), 4.10-4.03 (m, 0.31H)\*, 3.95-3.87 (m, 0.31H)\*, 3.11-2.95 (m, 0.62H), 2.90-2.70 (m, 2.71H), 2.50-2.36 (m, 1.38H), 2.27-2.19 (m, 0.31H)\*, 1.46 (d,  $J = 6.9$  Hz, 2.07H),

1.34-1.16 (m, 11.79H), 1.07 (d,  $J = 6.7$  Hz, 2.07H), 0.18 (d,  $J = 6.8$  Hz, 2.07H).  $^{13}\text{C}$  NMR (150 MHz,  $\text{CDCl}_3$ )  $\delta$  200.38, 199.93\*, 149.20, 148.99, 144.41, 143.16\*, 142.85\*, 141.86, 139.74\*, 138.18, 134.91\*, 134.49, 128.67\*, 128.56, 128.40, 127.88\*, 127.41, 126.51, 121.45\*, 121.32\*, 120.98, 120.41, 69.31, 68.49\*, 53.34\*, 51.65, 34.32, 34.23\*, 31.06, 30.94\*, 30.70, 30.30\*, 30.17\*, 29.68\*, 26.04, 25.43\*, 24.79\*, 24.54\*, 24.51\*, 24.23, 23.98, 23.96, 23.51, 23.45\*, 23.10, 21.13. HRMS (ESI-TOF) Calcd for  $\text{C}_{25}\text{H}_{34}\text{NS}$   $[\text{M}+\text{H}]^+$ : 380.2406; found: 380.2398.

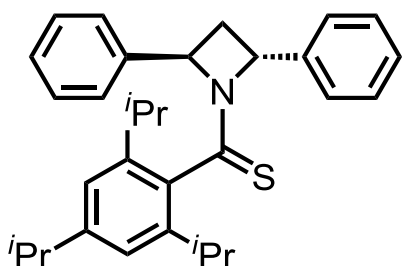

**((2*R*,4*R*)-2,4-diphenylazetid-1-yl)(2,4,6-triisopropylphenyl)methanethione (2d<sub>ii</sub>)**

Following the general procedure for the enantioselective arylation, the title compound was obtained in 13% yield (11.8 mg). The er value was determined by HPLC analysis on a Chiralcel OD-H column (5% isopropanol in hexanes, 0.5 mL/min) with  $t_r = 10.63$  min (minor), 12.31 min (major): 98:2 er.  $^1\text{H}$  NMR (600 MHz,  $\text{CDCl}_3$ )  $\delta$  7.63-7.60 (m, 2H), 7.47-7.42 (m, 2H), 7.38-7.33 (m, 1H), 7.20-7.12 (m, 3H), 6.95 (d,  $J = 1.6$  Hz, 1H), 6.90-6.86 (m, 2H), 6.53 (d,  $J = 1.6$  Hz, 1H), 3.07 (hept,  $J = 6.8$  Hz, 1H), 3.00-2.93 (m, 1H), 2.84-2.74 (m, 2H), 2.46 (hept,  $J = 6.8$  Hz, 1H), 1.56 (d,  $J = 7.0$  Hz, 6H), 1.22-1.15 (m, 6H), 1.07 (d,  $J = 6.7$  Hz, 3H), 1.03 (d,  $J = 6.7$  Hz, 3H), 0.22 (d,  $J = 6.8$  Hz, 3H).  $^{13}\text{C}$  NMR (150 MHz,  $\text{CDCl}_3$ )  $\delta$  199.05, 149.13, 144.94, 142.05, 138.87, 138.44, 134.63, 128.62, 128.48, 128.40, 128.23, 128.12, 127.82, 121.05, 120.35, 68.85, 67.32, 34.32, 33.91, 30.83, 29.85, 26.56, 25.63, 24.25, 23.99, 23.22, 21.40. HRMS (ESI-TOF) Calcd for  $\text{C}_{31}\text{H}_{38}\text{NS}$   $[\text{M}+\text{H}]^+$ : 456.2719; found: 456.2710.

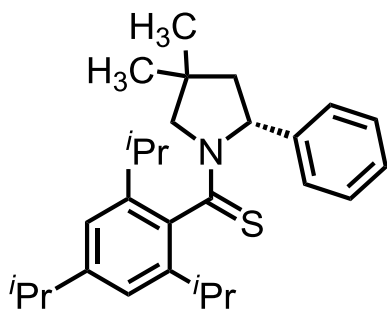

**(*R*)-(4,4-dimethyl-2-phenylpyrrolidin-1-yl)(2,4,6-triisopropylphenyl)methanethione  
(2e)**

Following the general procedure for the enantioselective arylation, the title compound was obtained in 78% yield (65.6 mg). The er value was determined by HPLC analysis on two Chiralcel IC columns attached one after the other (1% isopropanol in hexanes, 0.5 mL/min) with  $t_r = 25.10$  min (minor), 49.86 min (major): 95.5:4.5 er.  $^1\text{H}$  NMR (600 MHz,  $\text{CDCl}_3$ ) (77:23 mixture of rotamers, peaks corresponding to minor rotamer starred)  $\delta$  7.37-7.30 (m, 3.08H), 7.27-7.23 (m, 0.77H), 7.11-7.06 (m, 0.69H), 6.98-6.96 (m, 1H), 6.95-6.91 (m, 0.77H), 6.66-6.63 (m, 0.46H)\*, 6.55 (d,  $J = 1.7$  Hz, 0.23H)\*, 5.61 (t,  $J = 9.0$  Hz, 0.77H), 5.07 (dd,  $J = 13.3, 1.6$  Hz, 0.23H)\*, 4.70 (t,  $J = 8.3$  Hz, 0.23H)\*, 3.73 (d,  $J = 13.3$  Hz, 0.23H)\*, 3.47 (dd,  $J = 11.8, 1.8$  Hz, 0.77H), 3.34 (d,  $J = 11.9$  Hz, 0.77H), 3.04-2.73 (m, 2.77H), 2.44-2.30 (m, 1H), 2.29-2.21 (m, 0.23H)\*, 2.01-1.92 (m, 1H), 1.43 (d,  $J = 6.9$  Hz, 0.69H)\*, 1.31-1.18 (m, 15H), 1.17 (s, 2.31H), 1.12-1.08 (m, 3H) 1.01 (d,  $J = 6.7$  Hz, 2.31H), 0.17 (d,  $J = 6.7$  Hz, 0.69H)\*.  $^{13}\text{C}$  NMR (150 MHz,  $\text{CDCl}_3$ )  $\delta$  200.36\*, 199.08, 148.74\*, 148.45, 144.46\*, 142.76, 142.64, 142.37\*, 141.75, 140.50\*, 138.63, 137.23\*, 128.51\*, 128.18, 127.20\*, 127.15, 126.91, 126.60\*, 121.52, 121.12\*, 120.43\*, 67.04, 66.60\*, 66.52\*, 66.08, 52.17\*, 50.81, 37.83, 36.68\*, 34.25\*, 34.13, 31.06, 30.79\*, 29.63, 27.58\*, 27.27\*, 26.32\*, 25.88, 25.78, 25.68, 24.56, 24.20\*, 23.97, 23.45, 22.99\*, 21.39\*. HRMS (ESI-TOF) Calcd for  $\text{C}_{28}\text{H}_{40}\text{NS}$   $[\text{M}+\text{H}]^+$ : 422.2876; found: 422.2872.

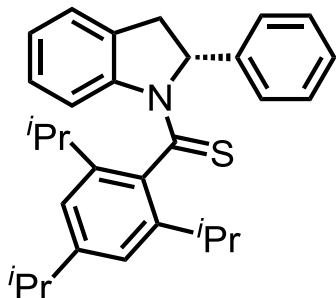



**(R)-(2-phenylindolin-1-yl)(2,4,6-triisopropylphenyl)methanethione (2f)**

Following the general procedure for the enantioselective arylation, the title compound was obtained in 86% yield (75.8 mg). The er value was determined by HPLC analysis with two columns, on Chiralcel OD-H column and Chiralcel IC column attached one after the other (1% isopropanol in hexanes, 0.5 mL/min) with  $t_r = 19.33$  min (minor), 19.98 min (major): er.  $^1\text{H}$  NMR (400 MHz,  $\text{CDCl}_3$ ) (92:8 mixture of rotamers, peaks corresponding to minor rotamer starred)  $\delta$  7.33-7.15 (m, 6H), 7.08-6.92 (m, 3H), 6.81 (t,  $J = 7.9$  Hz, 0.92H), 6.74 (dd,  $J = 9.8, 1.8$  Hz, 1H), 6.62-6.57 (m, 0.08H)\*, 5.64 (d,  $J = 8.4$  Hz, 0.92H), 5.58 (d,  $J = 8.4$  Hz, 0.08H)\*, 4.76-4.69 (m, 0.16H)\*, 3.78 (dd,  $J = 16.2, 9.7$  Hz, 0.92H), 3.25-3.18 (m, 0.16H)\*, 3.04-2.70 (m, 4H), 1.31-1.06 (m, 15.24H), 0.68 (d,  $J = 6.9$  Hz, 2.76H).  $^{13}\text{C}$  NMR (100 MHz,  $\text{CDCl}_3$ )  $\delta$  197.95, 149.47, 143.90, 143.03, 141.58, 141.35, 137.83, 133.40, 128.70\*, 128.47, 127.52, 127.24, 125.95, 125.93, 125.14, 121.87, 117.18, 67.74, 36.44, 34.31, 30.77, 30.02, 25.02, 24.76\*, 24.33, 24.14, 24.10\*, 24.07, 23.68, 23.37\*, 22.62. HRMS (ESI-TOF) Calcd for  $\text{C}_{30}\text{H}_{36}\text{NS}$   $[\text{M}+\text{H}]^+$ : 442.2563; found: 442.2559.

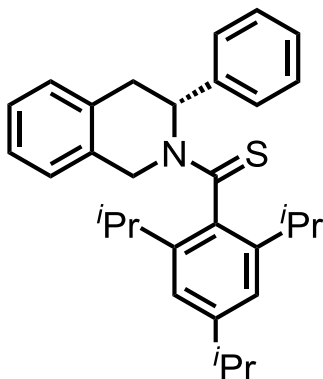

**(R)-(3-phenyl-3,4-dihydroisoquinolin-2(1H)-yl)(2,4,6-triisopropylphenyl) methanethione (2g)**

Following the general procedure for the enantioselective arylation, the title compound was obtained in 77% yield (70 mg). The er value was determined by HPLC analysis on two Chiralcel IC columns attached one after the other (1% isopropanol in hexanes, 0.5 mL/min) with  $t_r = 20.70$  min (minor), 24.30 min (major): 94:6 er.  $^1\text{H}$  NMR (400 MHz,  $\text{CDCl}_3$ ) (87:13 mixture of rotamers, peaks corresponding to minor rotamer starred)  $\delta$  7.66 (d,  $J = 6.1$  Hz, 0.87H), 7.37-6.88 (m, 9.74H), 6.80 (m, 0.39H)\*, 6.71 (d,  $J = 7.7$  Hz,

0.87H), 5.74 (d,  $J = 19.0$  Hz, 0.13H)\*, 5.51 (dd,  $J = 5.1, 2.5$  Hz, 0.13H)\*, 5.35 (d,  $J = 19.0$  Hz, 0.13H)\*, 4.55 (d,  $J = 16.7$  Hz, 0.87H), 3.98 (d,  $J = 16.6$  Hz, 0.87H), 3.64 (dd,  $J = 17.1, 6.3$  Hz, 0.87H), 3.49-3.29 (m, 1H), 3.15-2.95 (m, 1H), 2.94-2.49 (m, 2.13H), 1.37-1.06 (m, 15H), 0.68 (d,  $J = 6.9$  Hz, 2.61H), 0.21 (d,  $J = 6.8$  Hz, 0.39H)\*.  $^{13}\text{C}$  NMR (100 MHz,  $\text{CDCl}_3$ )  $\delta$  201.97\*, 200.68, 148.63, 148.53\*, 143.86\*, 142.24, 142.07, 141.54\*, 139.61\*, 138.16, 137.15\*, 136.87, 132.59, 132.54\*, 131.42, 131.00\*, 128.74, 128.51, 128.36\*, 128.20\*, 127.76, 127.38, 127.19, 127.11\*, 127.04\*, 126.37, 126.30\*, 125.90, 125.58, 121.79\*, 121.51, 121.00, 60.83\*, 55.58, 52.07\*, 49.06, 36.72\*, 34.13, 34.09\*, 31.37\*, 30.64\*, 30.45, 30.16, 25.58\*, 25.52\*, 24.88, 24.43, 23.96, 23.92, 23.26\*, 22.86, 21.61\*. HRMS (ESI-TOF) Calcd for  $\text{C}_{31}\text{H}_{38}\text{NS}$   $[\text{M}+\text{H}]^+$ : 456.2719; found: 456.2710.

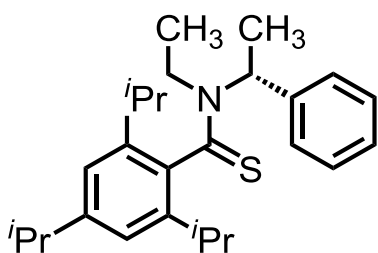

**(R)-N-ethyl-2,4,6-triisopropyl-N-(1-phenylethyl)benzothioamide (2h)**

Following the general procedure for the enantioselective arylation with 2 equiv. of 1,4-BQ, the title compound was obtained in 49% yield (38.7 mg). The er value was determined by HPLC analysis on two Chiralcel IC columns attached one after the other (5% isopropanol in hexanes, 0.5 mL/min) with  $t_r = 16.22$  min (minor), 17.05 (major): 98:2 er.  $^1\text{H}$  NMR (400 MHz,  $\text{CDCl}_3$ ) (85:15 mixture of rotamers, peaks corresponding to minor rotamer starred)  $\delta$  7.56-7.21 (m, 5.7H), 7.14 (d,  $J = 7.6$  Hz, 0.3H)\*, 6.95 (d,  $J = 6.1$  Hz, 1.7H), 5.26 (q,  $J = 7.2$  Hz, 0.15H)\*, 4.81-4.67 (m, 0.15H)\*, 3.73-3.61 (m, 0.15H)\*, 3.35-3.22 (m, 0.85H), 3.17-3.04 (m, 0.85H), 2.98-2.75 (m, 3H), 1.76 (d,  $J = 7.1$  Hz, 2.53H), 1.62 (d,  $J = 7.0$  Hz, 0.47H)\*, 1.44 (t,  $J = 7.0$  Hz, 0.47H)\*, 1.37-1.08 (m, 17.53H), 0.70-0.57 (m, 3H).  $^{13}\text{C}$  NMR (150 MHz,  $\text{CDCl}_3$ )  $\delta$  201.54, 201.48\*, 148.37, 148.24\*, 143.19\*, 142.26\*, 142.00, 141.69, 140.10\*, 139.34, 137.33, 137.11\*, 128.57, 128.00, 127.94, 127.3\*2, 126.42\*, 121.87\*, 121.36, 121.21\*, 61.69\*, 57.46, 43.82\*, 43.56, 34.13, 34.07\*, 31.07, 30.77, 30.73, 30.21\*, 25.69\*, 25.62, 25.48, 23.98, 23.93, 23.17\*, 22.99,

22.87, 22.75\*, 19.65\*, 15.44, 14.73, 12.34\*. HRMS (ESI-TOF) Calcd for C<sub>26</sub>H<sub>38</sub>NS [M+H]<sup>+</sup>: 396.2719; found: 396.2713.

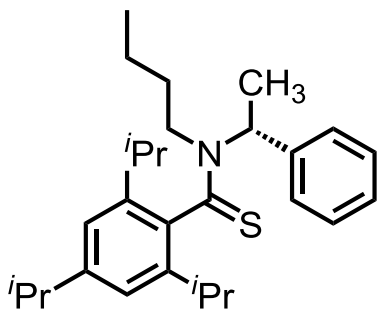

**(R)-N-butyl-2,4,6-triisopropyl-N-(1-phenylethyl)benzothioamide (2i)**

Following the general procedure for the enantioselective arylation with 2 equiv. of 1,4-BQ, the title compound was obtained in 53% yield (44.8 mg). The er value was determined by HPLC analysis on two Chiralcel IC columns attached one after the other (2% isopropanol in hexanes, 0.5 mL/min) with  $t_r$  = 16.48 min (minor), 18.28 (major): 92:8 er. <sup>1</sup>H NMR (600 MHz, CDCl<sub>3</sub>) (65:35 mixture of rotamers, peaks corresponding to minor rotamer starred)  $\delta$  7.52-7.49 (m, 1.35H), 7.46-7.37 (m, 2H), 7.35-7.29 (m, 1.35H), 7.27-7.23 (m, 0.35H)\*, 7.16-7.12 (m, 0.65H), 6.97-6.92 (m, 1.65H), 6.85 (d,  $J$  = 1.7 Hz, 0.35H)\*, 5.25 (q,  $J$  = 7.0 Hz, 0.35H)\*, 4.62-4.53 (m, 0.35H)\*, 3.56-3.49 (m, 0.35H)\*, 3.08-3.00 (m, 0.65H), 2.98-2.76 (m, 3.65H), 1.73 (d,  $J$  = 7.1 Hz, 1.95H), 1.61 (d,  $J$  = 7.0 Hz, 1.05H), 1.34-1.11 (m, 17H), 1.14 (d,  $J$  = 6.9 Hz, 1.95H), 0.95 (t,  $J$  = 7.4 Hz, 1.05H), 0.80-0.62 (m, 2H), 0.60 (d,  $J$  = 6.8 Hz, 1.05H), 0.40 (t,  $J$  = 7.3 Hz, 1.95H). <sup>13</sup>C NMR (150 MHz, CDCl<sub>3</sub>)  $\delta$  201.60\*, 201.38, 148.52, 148.22\*, 143.18\*, 142.23\*, 141.99, 141.75, 140.15\*, 139.36, 137.22, 137.19, 128.54, 128.02\*, 127.99, 127.32\*, 126.46, 121.89\*, 121.25, 121.21, 61.62\*, 57.46, 49.32\*, 48.53, 34.22, 34.08\*, 31.09\*, 30.84, 30.75\*, 30.56\*, 30.27, 29.70, 28.26, 25.75\*, 25.64, 24.01, 23.94, 23.20\*, 22.81, 22.75, 22.71, 20.58\*, 20.06, 19.78\*, 15.27, 13.66\*, 12.70. HRMS (ESI-TOF) Calcd for C<sub>28</sub>H<sub>42</sub>NS [M+H]<sup>+</sup>: 424.3032; found: 424.3027.

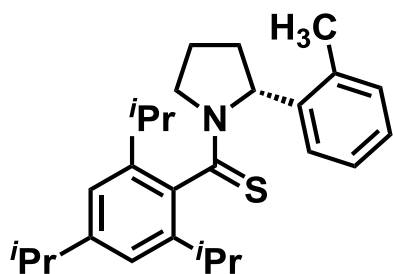

**(R)-2-(*o*-tolyl)pyrrolidin-1-yl(2,4,6-triisopropylphenyl)methanethione (3a)**

Following the general procedure for the enantioselective arylation, the title compound was obtained in 71% yield (57.8 mg). The er value was determined by HPLC analysis on two Chiralcel IC columns attached one after the other (1% isopropanol in hexanes, 0.5 mL/min) with  $t_r = 26.55$  min and 33.33 min (minor), 34.98 (major): 97:3 er.  $^1\text{H}$  NMR (600 MHz,  $\text{CDCl}_3$ ) (64:36 mixture of rotamers, peaks corresponding to minor rotamer starred)  $\delta$  7.22-7.13 (m, 2.28H), 7.10-7.06 (m, 0.36H)\*, 7.03-6.96 (m, 2.64H), 6.96-6.93 (m, 0.36H)\*, 6.68 (d,  $J = 1.7$  Hz, 0.36H)\*, 6.00 (dd,  $J = 8.3, 3.7$  Hz, 0.64H), 5.13-5.09 (m, 0.36H)\*, 4.34-4.18 (m, 0.72H)\*, 3.58-3.52 (m, 1.28H), 3.00 (hept,  $J = 6.8$  Hz, 0.64H), 2.87 (heptd,  $J = 6.7, 2.0$  Hz, 1.28H), 2.79 (hept,  $J = 7.0$  Hz, 0.36H)\*, 2.68 (hept,  $J = 6.8$  Hz, 0.36H)\*, 2.53-2.44 (m, 2.56H), 2.43-2.36 (m, 0.36H)\*, 2.36-2.26 (m, 0.36H)\*, 2.26-2.08 (m, 1.36H), 1.99-1.88 (m, 1.28H), 1.69 (dd,  $J = 11.4, 6.3$  Hz, 0.36H)\*, 1.62 (s, 1.08H)\*, 1.33 (dd,  $J = 6.9, 5.6$  Hz, 3.00H), 1.30-1.22 (m, 8.76H), 1.18 (dd,  $J = 6.9, 1.0$  Hz, 2.16H)\*, 1.13 (d,  $J = 6.8$  Hz, 1.92H), 1.08 (d,  $J = 6.7$  Hz, 1.08H)\*, 0.03 (d,  $J = 6.8$  Hz, 1.08H)\*.  $^{13}\text{C}$  NMR (150 MHz,  $\text{CDCl}_3$ ) (mixture of rotamers, peaks corresponding to minor rotamer starred)  $\delta$  199.4\*, 198.8, 148.6\*, 148.6, 143.6\*, 142.8, 141.4, 141.3\*, 140.2, 139.6\*, 138.4, 138.3\*, 135.2, 133.9\*, 130.8, 130.3\*, 127.2\*, 127.0, 126.4\*, 125.7, 125.4\*, 123.8, 121.8, 121.4, 120.8\*, 63.4\*, 63.3, 54.3, 53.4\*, 34.3\*, 34.2, 33.1, 33.0\*, 31.5\*, 30.9, 30.6\*, 30.1, 25.8\*, 25.6\*, 25.4, 24.7, 24.1, 24.1\*, 24.1, 24.0, 24.0\*, 23.9, 23.3, 23.1\*, 21.5\*, 21.2\*, 19.6, 18.5\*. HRMS (ESI-TOF) Calcd for  $\text{C}_{27}\text{H}_{38}\text{NS}$   $[\text{M}+\text{H}]^+$ : 408.2719; found: 408.2715.

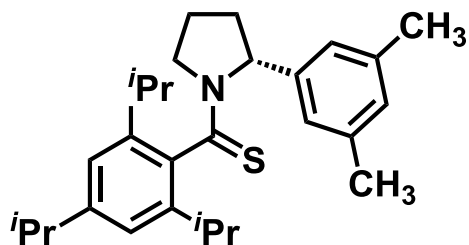

**(R)-(2-(3,5-dimethylphenyl)pyrrolidin-1-yl)(2,4,6-triisopropylphenyl)methanethione (3b)**

Following the general procedure for the enantioselective arylation, the title compound was obtained in 88 % yield (74 mg). The er value was determined by HPLC analysis on two Chiralcel IC columns attached one after the other (1% isopropanol in hexanes, 0.5 mL/min) with  $t_r = 39.77$  min (minor), 55.86 (major): 97:3 er.  $^1\text{H}$  NMR (600 MHz,  $\text{CDCl}_3$ ) (65:35 mixture of rotamers, peaks corresponding to minor rotamer starred)  $\delta$  7.00-6.97 (m, 1.30H), 6.96 (d,  $J = 1.7$  Hz, 0.35H)\*, 6.92-6.90 (m, 0.65H), 6.86 (dd,  $J = 1.6, 0.8$  Hz, 1.30H), 6.82-6.79 (m, 0.35H)\*, 6.68 (d,  $J = 1.7$  Hz, 0.35H)\*, 6.41-6.39 (m, 0.70H)\*, 5.83 (dd,  $J = 8.2, 3.6$  Hz, 0.65H), 4.77 (d,  $J = 6.5$  Hz, 0.35H)\*, 4.32-4.26 (m, 0.35H)\*, 4.25-4.20 (m, 0.35H)\*, 3.54-3.46 (m, 1.30H), 3.07 (hept,  $J = 6.9$  Hz, 0.65H), 2.91-2.83 (m, 1.30H), 2.81 (hept,  $J = 7.0$  Hz, 0.35H)\*, 2.64 (hept,  $J = 6.8$  Hz, 0.35H)\*, 2.52 (hept,  $J = 6.7$  Hz, 0.35H)\*, 2.48-2.41 (m, 0.65H), 2.33 (s, 3.90H), 2.26-2.17 (m, 0.65H), 2.20 (s, 2.10H)\*, 2.15-2.05 (m, 1.00H), 2.04-1.98 (m, 0.70H)\*, 1.94-1.87 (m, 0.65H), 1.86-1.79 (m, 0.35H)\*, 1.33 (dd,  $J = 6.9, 4.1$  Hz, 3.00H), 1.27 (d,  $J = 4.0$  Hz, 1.95H), 1.25 (d,  $J = 3.7$  Hz, 1.95H), 1.23 (dd,  $J = 6.9, 1.9$  Hz, 4.95H), 1.20 (d,  $J = 2.1$  Hz, 1.05H)\*, 1.19 (d,  $J = 2.1$  Hz, 1.05H)\*, 1.17 (d,  $J = 6.7$  Hz, 1.95H), 1.12 (d,  $J = 6.7$  Hz, 1.05H)\*, 0.16 (d,  $J = 6.8$  Hz, 1.05H)\*.  $^{13}\text{C}$  NMR (150 MHz,  $\text{CDCl}_3$ ) (mixture of rotamers, peaks corresponding to minor rotamer starred)  $\delta$  199.6\*, 198.9, 148.5, 148.5\*, 143.8\*, 142.5, 141.9, 141.3, 141.2\*, 141.0\*, 138.6, 138.0\*, 138.0, 128.8\*, 128.7, 123.6, 123.4\*, 121.7, 121.5, 121.3\*, 120.8\*, 66.9\*, 66.1, 54.0, 53.2\*, 34.9\*, 34.7, 34.2, 34.2\*, 31.4\*, 30.8, 30.6\*, 30.2, 25.8\*, 25.7\*, 25.3, 24.8, 24.3, 24.1\*, 24.0, 24.0, 23.9\*, 23.8, 23.3, 23.1\*, 21.7\*, 21.5, 21.3, 21.1\*. HRMS (ESI-TOF) Calcd for  $\text{C}_{28}\text{H}_{40}\text{NS}$   $[\text{M}+\text{H}]^+$ : 422.2876; found: 422.2870.

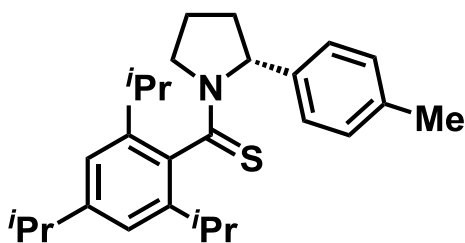

**(R)-(2-(p-tolyl)pyrrolidin-1-yl)(2,4,6-triisopropylphenyl)methanethione (3c)**

Following the general procedure for the enantioselective arylation, the title compound was obtained in 61% yield (49.6 mg). The er value was determined by HPLC analysis on two Chiralcel IC columns attached one after the other (1% isopropanol in hexanes, 0.5 mL/min) with  $t_r = 40.49$  min (major), 43.21 (minor): 93:7 er.  $^1\text{H}$  NMR (600 MHz,  $\text{CDCl}_3$ ) (75:25 mixture of rotamers, peaks corresponding to minor rotamer starred)  $\delta$  7.20-7.15 (m, 3.00H), 7.03-7.01 (m, 0.50H)\*, 6.99 (d,  $J = 0.8$  Hz, 1.50H), 6.96 (d,  $J = 1.7$  Hz, 0.25H)\*, 6.74 (d,  $J = 8.1$  Hz, 0.50H)\*, 6.69 (d,  $J = 1.7$  Hz, 0.25H)\*, 5.88 (dd,  $J = 8.2, 3.6$  Hz, 0.75H), 4.83 (d,  $J = 6.5$  Hz, 0.25H)\*, 4.32-4.22 (m, 0.50H)\*, 3.55-3.46 (m, 1.50H), 2.98 (hept,  $J = 6.8$  Hz, 0.75H), 2.88 (dhept,  $J = 10.8, 6.8$  Hz, 1.50H), 2.80 (hept,  $J = 7.0$  Hz, 0.25H)\*, 2.66 (hept,  $J = 6.8$  Hz, 0.25H)\*, 2.53-2.43 (m, 1.00H), 2.36 (s, 2.25H), 2.28 (s, 0.75H)\*, 2.26-2.19 (m, 0.50H)\*, 2.19-2.06 (m, 1.00H), 2.06-2.00 (m, 0.75H), 1.96-1.89 (m, 0.75H), 1.84-1.77 (m, 0.25H)\*, 1.33 (d,  $J = 6.9$  Hz, 0.75H)\*, 1.30 (d,  $J = 7.0$  Hz, 2.25H), 1.27 (dd,  $J = 6.9, 2.0$  Hz, 4.50H), 1.25-1.23 (m, 5.25H), 1.20 (dd,  $J = 6.9, 3.4$  Hz, 1.50H)\*, 1.16 (d,  $J = 6.7$  Hz, 2.25H), 1.11 (d,  $J = 6.7$  Hz, 0.75H)\*, 0.13 (d,  $J = 6.7$  Hz, 0.75H)\*.  $^{13}\text{C}$  NMR (150 MHz,  $\text{CDCl}_3$ ) (mixture of rotamers, peaks corresponding to minor rotamer starred)  $\delta$  199.5\*, 199.0, 148.5, 148.4\*, 143.6\*, 142.5, 141.3, 141.0\*, 139.0, 138.6, 138.3\*, 138.0\*, 136.9\*, 136.5, 129.2, 129.1\*, 125.9, 125.5\*, 121.6, 121.4, 121.4\*, 120.7\*, 66.6\*, 65.8, 53.9, 53.1\*, 34.9\*, 34.6, 34.2, 34.1\*, 31.3\*, 30.8, 30.5\*, 30.1, 25.7\*, 25.6\*, 25.3, 24.6, 24.0, 24.0, 23.9\*, 23.7, 23.3, 23.2\*, 21.5\*, 21.3\*, 21.1, 20.9\*. HRMS (ESI-TOF) Calcd for  $\text{C}_{27}\text{H}_{38}\text{NS}$   $[\text{M}+\text{H}]^+$ : 408.2719; found: 408.2724.

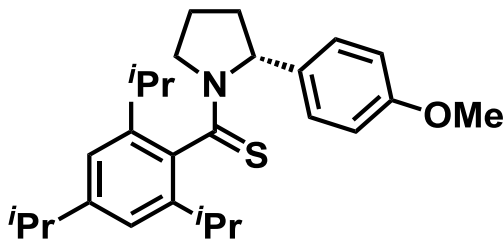

**(R)-2-(4-methoxyphenyl)pyrrolidin-1-yl(2,4,6-triisopropylphenyl)methanethione  
(3d)**

Following the general procedure for the enantioselective arylation, the title compound was obtained in 84% yield (71.2 mg). The er value was determined by HPLC analysis on two Chiralcel IC columns attached one after the other (1% isopropanol in hexanes, 0.5 mL/min) with  $t_r = 39.90$  min and 64.08 min (minor), 43.05 min and 46.93 min (major):

98.5:1.5 er.  $^1\text{H}$  NMR (600 MHz,  $\text{CDCl}_3$ ) (67:33 mixture of rotamers, peaks corresponding to minor rotamer starred)  $\delta$  7.23-7.17 (m, 1.37H), 6.99-6.94 (m, 1.67H), 6.78-6.68 (m, 1.34H), 6.92-6.87 (m, 1.67H), 5.86 (dd,  $J = 8.2, 3.6$  Hz, 0.67H), 4.82 (d,  $J = 6.3$  Hz, 0.33H), 4.32-4.19 (m, 0.67H), 3.81 (s, 2H), 3.75 (s, 1H), 3.54-3.43 (m, 1H), 2.95-2.77 (m, 2.34H), 2.64 (hept,  $J = 6.8$  Hz, 0.33H), 2.53-2.40 (m, 1H), 2.25-2.00 (m, 2.34H), 1.96-1.88 (m, 0.66H), 1.81-1.77 (m, 0.33H), 1.32 (d,  $J = 6.9$  Hz, 1H), 1.30-1.17 (m, 13H), 1.14 (d,  $J = 6.7$  Hz, 2H), 1.11 (d,  $J = 6.7$  Hz, 1H), 0.18 (d,  $J = 6.8$  Hz, 1H).  $^{13}\text{C}$  NMR (150 MHz,  $\text{CDCl}_3$ )  $\delta$  199.56\*, 198.95, 158.84\*, 158.49, 148.52, 148.46\*, 143.63\*, 142.51, 141.27, 141.07\*, 138.57, 137.98\*, 134.07, 133.58\*, 127.30, 126.72\*, 121.63, 121.41, 121.38\*, 120.76\*, 113.93\*, 113.82, 66.30\*, 65.43, 55.33\*, 55.20, 53.86, 53.09\*, 34.93\*, 34.55, 34.19, 34.13\*, 31.32\*, 30.81, 30.56, 30.10, 25.71\*, 25.62\*, 25.24, 24.64, 24.01, 23.98\*, 23.94\*, 23.76, 23.29, 23.19, 21.49\*. HRMS (ESI-TOF) Calcd for  $\text{C}_{27}\text{H}_{38}\text{NOS}$   $[\text{M}+\text{H}]^+$ : 424.2669; found: 424.2662.

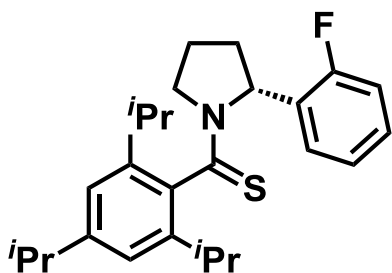

**(R)-2-(2-(2-fluorophenyl)pyrrolidin-1-yl)(2,4,6-triisopropylphenyl)methanethione (3e)**

Following the general procedure for the enantioselective arylation with 2 equiv. of 1,4-BQ, the title compound was obtained in 78% yield (64 mg). The er value was determined by HPLC analysis on two columns attached one after the other with Chiralcel ADH followed by Chiralcel IC column (0.5% isopropanol in hexanes, 0.5 mL/min) with  $t_r = 32.45$  min (minor), 41.02 (major): 98.5:1.5 er.  $^1\text{H}$  NMR (600 MHz,  $\text{CDCl}_3$ ) (66:34 mixture of rotamers, peaks corresponding to minor rotamer starred)  $\delta$  7.29-7.24 (m, 0.66H), 7.24-7.20 (m, 0.66H), 7.20-7.16 (m, 0.34H)\*, 7.14-7.04 (m, 1.66H), 7.02-6.97 (m, 1.66H), 6.96 (d,  $J = 1.7$  Hz, 0.34H)\*, 6.91-6.86 (m, 0.34H)\*, 6.69 (d,  $J = 1.6$  Hz, 0.34H)\*, 5.99 (dd,  $J = 8.3, 4.5$  Hz, 0.66H), 5.17 (d,  $J = 7.3$  Hz, 0.34H)\*, 4.34-4.27 (m, 0.34H)\*, 4.26-4.20 (m, 0.34H)\*, 3.59-3.49 (m, 1.32H), 2.95 (hept,  $J = 6.8$  Hz, 0.66H), 2.90-2.83 (m, 1.32H), 2.80 (hept,  $J = 6.9$  Hz, 0.34H)\*, 2.63 (hept,  $J = 6.8$  Hz, 0.34H)\*,

2.57-2.49 (m, 1.00H), 2.28-2.19 (m, 0.34H)\*, 2.19-2.13 (m, 0.66H), 2.13-2.03 (m, 1.34H), 1.97-1.89 (m, 0.66H), 1.89-1.85 (m, 0.34H)\*, 1.33 (d,  $J = 7.0$  Hz, 1.02H)\*, 1.29 (d,  $J = 7.0$  Hz, 1.98H), 1.26 (dd,  $J = 6.8, 3.7$  Hz, 3.96H), 1.24-1.22 (m, 4.98H), 1.19 (dd,  $J = 6.9, 3.7$  Hz, 2.04H)\*, 1.15-1.11 (m, 3.00H), 0.19 (d,  $J = 6.8$  Hz, 1.02H)\*.  $^{13}\text{C}$  NMR (150 MHz,  $\text{CDCl}_3$ ) (mixture of rotamers, peaks corresponding to minor rotamer starred)  $\delta$  200.3\*, 199.3, 160.04 (d,  $J = 246.1$  Hz), 159.01 (d,  $J = 246.8$  Hz)\*, 148.7\*, 148.6, 143.4\*, 142.6, 141.4, 141.2\*, 138.6, 137.7\*, 130.9\*, 128.7, 128.4\*, 128.3\*, 128.95 (d,  $J = 9.0$  Hz)\*, 128.76 (d,  $J = 8.6$  Hz), 127.97 (d,  $J = 4.4$  Hz), 127.37 (d,  $J = 3.4$  Hz)\*, 124.17 (d,  $J = 3.4$  Hz)\*, 123.74 (d,  $J = 3.3$  Hz), 121.7, 121.4, 121.4\*, 121.0\*, 115.80 (d,  $J = 21.9$  Hz), 115.46 (d,  $J = 21.1$  Hz)\*, 61.3, 61.3, 60.8\*, 60.8\*, 54.0, 53.2\*, 34.2, 34.2\*, 33.6\*, 33.6, 31.3\*, 30.8, 30.6\*, 30.2, 25.7\*, 25.6\*, 25.3, 24.7, 24.3, 24.0, 24.0, 24.0, 23.9, 23.3, 23.1\*, 21.8\*, 21.7\*. HRMS (ESI-TOF) Calcd for  $\text{C}_{26}\text{H}_{35}\text{FNS}$   $[\text{M}+\text{H}]^+$ : 412.2469; found: 412.2461.

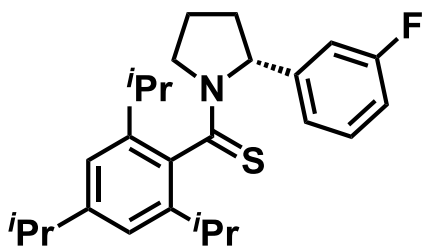

**(R)-2-(2-(3-fluorophenyl)pyrrolidin-1-yl)(2,4,6-triisopropylphenyl)methanethione (3f)**

Following the general procedure for the enantioselective arylation with 2 equiv. of 1,4-BQ, the title compound was obtained in 80% yield (65.6 mg). The er value was determined by HPLC analysis on two columns attached one after the other with Chiralcel ADH followed by Chiralcel IC column (1% isopropanol in hexanes, 0.5 mL/min) with  $t_r = 28.64$  min (minor), 32.05 (major): 99:1 er.  $^1\text{H}$  NMR (600 MHz,  $\text{CDCl}_3$ ) (64:36 mixture of rotamers, peaks corresponding to minor rotamer starred)  $\delta$  7.35-7.30 (m, 0.56H), 7.21-7.16 (m, 0.44H)\*, 7.08-7.05 (m, 0.56H), 7.00-6.93 (m, 2.7H), 6.89 (tdd,  $J = 8.4, 2.6, 0.8$  Hz, 0.44H)\*, 6.70 (d,  $J = 1.6$  Hz, 0.44H)\*, 6.65 (ddt,  $J = 7.6, 1.5, 0.7$  Hz, 0.44H)\*, 6.56 (dt,  $J = 9.7, 2.1$  Hz, 0.44H)\*, 5.88 (dd,  $J = 8.5, 3.7$  Hz, 0.56H), 4.85 (d,  $J = 7.1$  Hz, 0.44H)\*, 4.33-4.19 (m, 0.88H)\*, 3.58-3.45 (m, 1.12H), 3.01-2.76 (m, 2.2H), 2.63 (hept,  $J = 6.8$  Hz, 0.44H), 2.56-2.44 (m, 1.12H), 2.31-2.12 (m, 1.12H), 2.12-1.99 (m, 1.12H), 1.99-1.90 (m, 0.56H), 1.88-1.78 (m, 0.44H), 1.37-1.11 (m, 16.68H), 0.21 (d,  $J = 6.8$  Hz,



1.32H)\*.  $^{13}\text{C}$  NMR (150 MHz,  $\text{CDCl}_3$ )  $\delta$  200.17\*, 199.66, 163.03 (d,  $J = 245.9$  Hz)\*, 162.88 (d,  $J = 247.2$  Hz), 148.73\*, 148.71, 144.69 (d,  $J = 6.7$  Hz), 143.90 (d,  $J = 6.5$  Hz)\*, 143.61\*, 142.60, 141.28, 141.09\*, 138.36, 137.81\*, 130.15 (d,  $J = 8.3$  Hz)\*, 130.04 (d,  $J = 8.4$  Hz), 121.88 (d,  $J = 2.4$  Hz), 121.72, 121.50\*, 121.45, 121.26 (d,  $J = 2.5$  Hz), 120.87\*, 114.27 (d,  $J = 21.1$  Hz)\*, 113.95 (d,  $J = 21.0$  Hz), 112.95 (d,  $J = 22.2$  Hz), 112.84 (d,  $J = 22.1$  Hz)\*, 66.23\*, 65.61, 53.96, 53.12\*, 34.77\*, 34.50, 34.21, 34.14\*, 31.35\*, 30.87, 30.62\*, 30.26, 25.72, 25.63\*, 25.26, 24.58\*, 24.06, 24.01, 23.99, 23.91\*, 23.84\*, 23.27, 23.15\*, 21.53\*, 21.38. HRMS (ESI-TOF) Calcd for  $\text{C}_{26}\text{H}_{35}\text{FNS}$   $[\text{M}+\text{H}]^+$ : 412.2469; found: 412.2464.

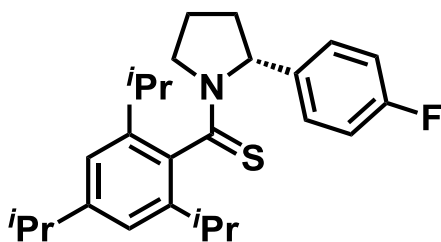

**(R)-2-(4-fluorophenyl)pyrrolidin-1-yl(2,4,6-triisopropylphenyl)methanethione (3g)**

Following the general procedure for the enantioselective arylation with 2 equiv. of 1,4-BQ, the title compound was obtained in 87% yield (71.4 mg). The er value was determined by HPLC analysis on two columns attached one after the other with Chiralcel ADH followed by Chiralcel IC column (1% isopropanol in hexanes, 0.5 mL/min) with  $t_r = 25.76$  min (major), 35.29 min (minor): 95.5:4.5 er.  $^1\text{H}$  NMR (600 MHz,  $\text{CDCl}_3$ ) (63:37 mixture of rotamers, peaks corresponding to minor rotamer starred)  $\delta$  7.27-7.23 (m, 1.26H), 7.07-7.03 (m, 1.26H), 6.99-6.97 (m, 1.26H), 6.96 (d,  $J = 1.7$  Hz, 0.37H)\*, 6.94-6.89 (m, 0.74H)\*, 6.84-6.80 (m, 0.74H)\*, 6.70 (d,  $J = 1.8$  Hz, 0.37H)\*, 5.87 (dd,  $J = 8.3, 3.8$  Hz, 0.63H), 4.85 (d,  $J = 6.9$  Hz, 0.37H)\*, 4.32-4.18 (m, 0.74H)\*, 3.57-3.51 (m, 0.63H), 3.51-3.45 (m, 0.63H), 2.92-2.76 (m, 2.38H), 2.63 (hept,  $J = 6.8$  Hz, 0.37H)\*, 2.54-2.43 (m, 1.00H), 2.28-2.12 (m, 1.05H)\*, 2.12-1.99 (m, 1.26H), 1.98-1.90 (m, 0.63H), 1.82-1.76 (m, 0.37H)\*, 1.32 (d,  $J = 6.9$  Hz, 1.11H)\*, 1.28-1.25 (m, 5.67H), 1.23 (dd,  $J = 6.8, 2.1$  Hz, 4.89H), 1.19 (dd,  $J = 6.9, 3.5$  Hz, 2.22H)\*, 1.14 (d,  $J = 6.7$  Hz, 1.89H), 1.11 (d,  $J = 6.7$  Hz, 1.11H)\*, 0.19 (d,  $J = 6.8$  Hz, 1.11H)\*.  $^{13}\text{C}$  NMR (150 MHz,  $\text{CDCl}_3$ ) (mixture of rotamers, peaks corresponding to minor rotamer starred)  $\delta$  200.0\*, 199.4, 161.76 (d,  $J = 245.2$  Hz), 162.02 (d,  $J = 245.6$  Hz)\*, 148.7, 143.6\*, 142.5, 141.3,

141.1\*, 138.4, 137.9\*, 137.80 (d,  $J = 4.1$  Hz), 137.26 (d,  $J = 3.3$  Hz)\*, 127.79 (d,  $J = 7.7$  Hz), 127.23 (d,  $J = 7.9$  Hz), 121.7, 121.5, 121.4\*, 120.9\*, 115.35 (d,  $J = 21.4$  Hz). 115.45 (d,  $J = 21.6$  Hz)\*, 66.1\*, 65.3, 53.9, 53.1\*, 34.9\*, 34.6, 34.2, 34.2\*, 31.3\*, 30.9, 30.6\*, 30.2, 25.7\*, 25.6\*, 25.3, 24.6, 24.0, 24.0\*, 23.9\*, 23.8, 23.3, 23.2\*, 21.5. HRMS (ESI-TOF) Calcd for  $C_{26}H_{35}FNS$   $[M+H]^+$ : 412.2469; found: 412.2468.

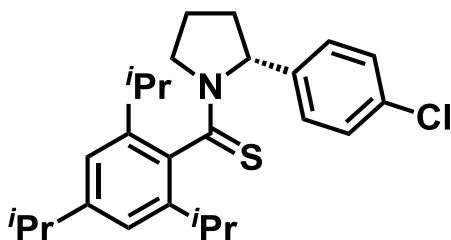

**(R)-2-(4-chlorophenyl)pyrrolidin-1-yl(2,4,6-triisopropylphenyl)methanethione (3h)**

Following the general procedure for the enantioselective arylation with 2 equiv. of 1,4-BQ, the title compound was obtained in 77% yield (65.2 mg). The er value was determined by HPLC analysis on two columns attached one after the other with Chiralcel ADH followed by Chiralcel IC column (0.5% isopropanol in hexanes, 0.5 mL/min) with  $t_r = 22.57$  min (major), 39.39 min (minor): 96:4 er.  $^1H$  NMR (600 MHz,  $CDCl_3$ ) (57:43 mixture of rotamers, peaks corresponding to minor rotamer starred)  $\delta$  7.36-7.31 (m, 1.14H), 7.23-7.17 (m, 2.00H), 6.99-6.97 (m, 1.14H), 6.96 (d,  $J = 1.7$  Hz, 0.43H)\*, 6.82-6.78 (m, 0.86H)\*, 6.70 (d,  $J = 1.7$  Hz, 0.43H)\*, 5.85 (dd,  $J = 8.3, 3.9$  Hz, 0.57H), 4.83 (d,  $J = 7.4$  Hz, 0.43H)\*, 4.32-4.20 (m, 0.86H)\*, 3.57-3.51 (m, 0.57H), 3.50-3.45 (m, 0.57H), 2.94-2.76 (m, 2.14H), 2.63 (hept,  $J = 6.8$  Hz, 0.43H)\*, 2.53-2.41 (m, 1.00H), 2.29-2.12 (m, 1.29H)\*, 2.12-1.98 (m, 1.14H), 1.98-1.89 (m, 0.57H), 1.82-1.76 (m, 0.43H)\*, 1.32 (d,  $J = 6.9$  Hz, 1.29H)\*, 1.30-1.21 (m, 9.84H), 1.19 (dd,  $J = 6.9, 3.1$  Hz, 2.58H)\*, 1.15 (d,  $J = 6.7$  Hz, 1.71H), 1.11 (d,  $J = 6.7$  Hz, 1.29H)\*, 0.20 (d,  $J = 6.7$  Hz, 1.29H)\*.  $^{13}C$  NMR (150 MHz,  $CDCl_3$ ) (mixture of rotamers, peaks corresponding to minor rotamer starred)  $\delta$  200.1\*, 199.5, 148.7, 143.6\*, 142.5, 141.3, 141.1\*, 140.6, 139.9\*, 138.4, 137.8\*, 133.2\*, 132.7, 128.7\*, 128.7, 127.5, 127.0\*, 121.7\*, 121.5, 120.9\*, 66.1\*, 65.5, 54.0, 53.1\*, 34.8\*, 34.6, 34.2, 34.2\*, 31.3\*, 30.9, 30.6\*, 30.2, 25.7\*, 25.6\*, 25.3, 24.6, 24.0\*, 24.0, 24.0\*, 23.9\*, 23.9, 23.3, 23.2\*, 21.5\*, 21.4\*. HRMS (ESI-TOF) Calcd for  $C_{26}H_{35}ClNS$   $[M+H]^+$ : 428.2173; found: 428.2175.

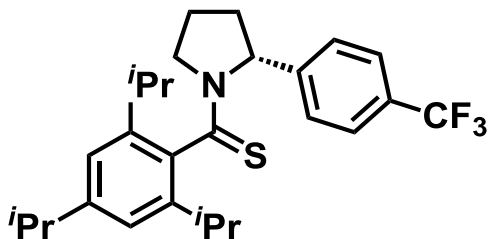

**(R)-2-(4-(trifluoromethyl)phenyl)pyrrolidin-1-yl(2,4,6-triisopropylphenyl)methanethione (3i)**

Following the general procedure for the enantioselective arylation with 2 equiv. of 1,4-BQ, the title compound was obtained in 71% yield (65.4 mg). The er value was determined by HPLC analysis on two columns attached one after the other with Chiralcel ADH followed by Chiralcel IC column (0.5% isopropanol in hexanes, 0.5 mL/min) with  $t_r = 29.97$  min (minor), 31.46 min (major): 96:4 er.  $^1\text{H}$  NMR (600 MHz,  $\text{CDCl}_3$ ) (94:6 mixture of rotamers, peaks corresponding to minor rotamer starred)  $\delta$  7.65-7.60 (m, 1.88H), 7.51-7.48 (m, 0.12H)\*, 7.41-7.36 (m, 1.88H), 7.02-6.98 (m, 2.00H), 6.98 (d,  $J = 1.7$  Hz, 0.06H)\*, 6.68 (d,  $J = 1.7$  Hz, 0.06H)\*, 5.93 (dd,  $J = 8.5, 3.8$  Hz, 0.94H), 4.92 (d,  $J = 7.6$  Hz, 0.06H)\*, 4.33-4.27 (m, 0.12H)\*, 3.61-3.54 (m, 0.94H), 3.54-3.48 (m, 0.94H), 2.94 (hept,  $J = 6.9$  Hz, 0.94H), 2.90-2.78 (m, 1.94H), 2.65 (hept,  $J = 6.8$  Hz, 0.06H)\*, 2.58-2.49 (m, 0.94H), 2.43 (hept,  $J = 6.7$  Hz, 0.06H)\*, 2.34-2.25 (m, 0.06H), 2.22-2.15 (m, 0.12H)\*, 2.12-1.93 (m, 2.82H), 1.86-1.80 (m, 0.06H)\*, 1.34 (d,  $J = 6.9$  Hz, 0.18H)\*, 1.32 (d,  $J = 7.0$  Hz, 2.82H), 1.29-1.22 (m, 11.46H), 1.19 (dd,  $J = 6.9, 3.9$  Hz, 0.36H)\*, 1.16 (d,  $J = 6.7$  Hz, 2.82H), 1.10 (d,  $J = 6.7$  Hz, 0.18H)\*, 0.10 (d,  $J = 6.8$  Hz, 0.18H)\*.  $^{13}\text{C}$  NMR (150 MHz,  $\text{CDCl}_3$ ) (mixture of rotamers, peaks corresponding to minor rotamer starred)  $\delta$  200.2\*, 199.8, 148.8, 146.2, 145.4\*, 143.4\*, 142.5, 141.3, 141.2\*, 138.2, 137.8\*, 129.25 (q,  $J = 32.8$  Hz), 126.4, 126.0\*, 125.53 (q,  $J = 3.6$  Hz), 124.11 (d,  $J = 271.8$  Hz), 121.7, 121.5, 120.9\*, 66.2\*, 65.7, 54.1, 53.2\*, 34.7\*, 34.6, 34.2, 34.1\*, 31.3\*, 30.9, 30.6\*, 30.3, 25.7\*, 25.6\*, 25.2, 24.6, 24.0, 24.0, 24.0, 23.9, 23.3, 23.2\*, 21.5\*, 21.2\*. HRMS (ESI-TOF) Calcd for  $\text{C}_{27}\text{H}_{35}\text{F}_3\text{NS}$   $[\text{M}+\text{H}]^+$ : 462.2437; found: 462.2443.

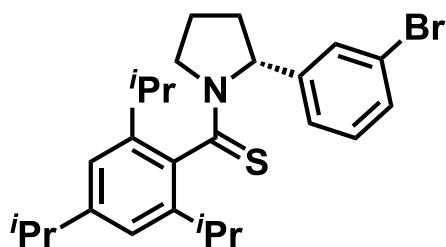

**(R)-2-(3-bromophenyl)pyrrolidin-1-yl(2,4,6-triisopropylphenyl)methanethione (3j)**

Following the general procedure for the enantioselective arylation, the title compound was obtained in 50% yield (47 mg). The er value was determined by HPLC analysis on two Chiralcel IC columns attached one after the other (5% isopropanol in hexanes, 0.5 mL/min) with  $t_r = 21.59$  min (minor), 27.316 min (major): 93:7 er.  $^1\text{H}$  NMR (600 MHz,  $\text{CDCl}_3$ ) (84:16 mixture of rotamers, peaks corresponding to minor rotamer starred)  $\delta$  7.42-7.39 (m, 0.84H), 7.39-7.37 (m, 0.84H), 7.33 (ddd,  $J = 8.0, 2.0, 1.0$  Hz, 0.16H)\*, 7.25-7.22 (m, 1.68H), 7.09 (t,  $J = 7.8$  Hz, 0.16H)\*, 7.01-6.98 (m, 1.68H), 6.98 – 6.96 (m, 0.32H)\*, 6.80-6.77 (m, 0.16H)\*, 6.71 (d,  $J = 1.7$  Hz, 0.16H)\*, 5.83 (dd,  $J = 8.4, 3.8$  Hz, 0.84H), 4.82 (d,  $J = 7.2$  Hz, 0.16H)\*, 4.33-4.27 (m, 0.16H)\*, 4.26-4.21 (m, 0.16H)\*, 3.57-3.46 (m, 1.68H), 2.96 (hept,  $J = 6.8$  Hz, 0.84H), 2.91-2.79 (m, 1.84H), 2.63 (hept,  $J = 6.8$  Hz, 0.16H)\*, 2.55-2.46 (m, 1.00H), 2.30-2.13 (m, 0.48H)\*, 2.12-2.00 (m, 1.68H), 1.98-1.89 (m, 0.84H), 1.83 (dd,  $J = 11.7, 5.6$  Hz, 0.16H)\*, 1.35 (d,  $J = 6.9$  Hz, 2.52H), 1.33 (d,  $J = 6.9$  Hz, 0.48H)\*, 1.29-1.22 (m, 10.56H), 1.20 (dd,  $J = 6.9, 3.0$  Hz, 0.96H)\*, 1.18 (d,  $J = 6.8$  Hz, 2.52H), 1.13 (d,  $J = 6.7$  Hz, 0.48H)\*, 0.23 (d,  $J = 6.8$  Hz, 0.48H)\*.  $^{13}\text{C}$  NMR (150 MHz,  $\text{CDCl}_3$ ) (mixture of rotamers, peaks corresponding to minor rotamer starred)  $\delta$  200.2\*, 199.6, 148.8\*, 148.7, 144.4, 143.6\*, 143.6\*, 142.6, 141.3, 141.0\*, 138.3, 137.8\*, 130.5\*, 130.2\*, 130.1, 130.1, 128.7\*, 128.6, 125.3, 124.3\*, 122.8\*, 122.7, 121.7, 121.5\*, 121.4, 120.9\*, 66.1\*, 65.5, 54.0, 53.1\*, 34.8\*, 34.6, 34.2, 34.1\*, 31.4\*, 30.9, 30.6\*, 30.3, 25.8\*, 25.6\*, 25.2, 24.6, 24.2, 24.0, 24.0, 23.9,\* 23.9, 23.3, 23.1\*, 21.6\*, 21.3\*. HRMS (ESI-TOF) Calcd for  $\text{C}_{26}\text{H}_{35}\text{BrNS}$   $[\text{M}+\text{H}]^+$ : 472.1668; found: 472.1674.

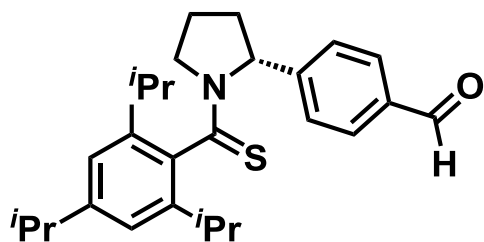

**(R)-4-(1-(2,4,6-triisopropylphenylcarbonothioyl)pyrrolidin-2-yl)benzaldehyde (3k)**

Following the general procedure for the enantioselective arylation with 2 equiv. of 1,4-BQ, the title compound was obtained in 71% yield (59.8 mg). The er value was determined by HPLC analysis on two Chiralcel IC columns attached one after the other (5% isopropanol in hexanes, 0.5 mL/min) with  $t_r$  = 86.21 min (minor), 93.86 min (major): 97:3 er.  $^1\text{H}$  NMR (600 MHz,  $\text{CDCl}_3$ ) (70:30 mixture of rotamers, peaks corresponding to minor rotamer starred)  $\delta$  10.02 (s, 0.70H), 9.96 (s, 0.30H)\*, 7.91-7.88 (m, 1.40H), 7.77-7.74 (m, 0.60H)\*, 7.45-7.42 (m, 1.40H), 7.06-7.03 (m, 0.60H)\*, 7.00-6.98 (m, 1.40H), 6.97 (d,  $J$  = 1.7 Hz, 0.30H)\*, 6.66 (d,  $J$  = 1.6 Hz, 0.30H)\*, 5.90 (dd,  $J$  = 8.5, 4.3 Hz, 0.70H), 4.93 (d,  $J$  = 7.7 Hz, 0.30H)\*, 4.36-4.26 (m, 0.60H)\*, 3.62-3.56 (m, 0.70H), 3.56-3.50 (m, 0.70H), 2.94 (hept,  $J$  = 6.9 Hz, 0.70H), 2.90-2.76 (m, 1.70H), 2.64 (hept,  $J$  = 6.8 Hz, 0.30H)\*, 2.60-2.53 (m, 0.70H), 2.46 (hept,  $J$  = 6.8 Hz, 0.30H)\*, 2.35-2.27 (m, 0.30H)\*, 2.22-2.15 (m, 0.60H)\*, 2.14-1.94 (m, 2.10H), 1.86-1.81 (m, 0.30H)\*, 1.34 (d,  $J$  = 6.9 Hz, 0.90H)\*, 1.32 (d,  $J$  = 7.0 Hz, 2.10H), 1.27 (d,  $J$  = 6.9 Hz, 2.10H), 1.26-1.22 (m, 7.20H), 1.18 (dd,  $J$  = 6.9, 4.1 Hz, 1.80H)\*, 1.14 (d,  $J$  = 6.8 Hz, 2.10H), 1.09 (d,  $J$  = 6.7 Hz, 0.90H)\*, 0.08-0.06 (m, 0.90H)\*.  $^{13}\text{C}$  NMR (150 MHz,  $\text{CDCl}_3$ ) (mixture of rotamers, peaks corresponding to minor rotamer starred)  $\delta$  200.4\*, 199.8, 191.7, 191.5\*, 149.3, 148.9, 148.8\*, 148.2\*, 143.4\*, 142.5, 141.4, 141.2\*, 138.2, 137.8\*, 135.6\*, 135.3, 130.1, 130.1\*, 126.7, 126.4\*, 121.7, 121.5, 121.5\*, 121.0\*, 66.5\*, 66.0, 54.2, 53.2\*, 34.7\*, 34.7, 34.2, 34.1\*, 31.3\*, 30.9, 30.7\*, 30.3, 25.7\*, 25.6\*, 25.3, 24.6, 24.1, 24.0, 24.0, 23.9\*, 23.3, 23.2\*, 21.6\*, 21.4\*. HRMS (ESI-TOF) Calcd for  $\text{C}_{27}\text{H}_{36}\text{NOS}$   $[\text{M}+\text{H}]^+$ : 422.2512; found: 422.2516.

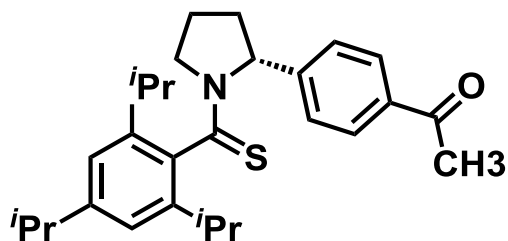

**(R)-1-(4-(1-(2,4,6-triisopropylphenylcarbonothioyl)pyrrolidin-2-yl)phenyl)ethan-1-one (3l)**

Following the general procedure for the enantioselective arylation with 2 equiv. of 1,4-BQ, the title compound was obtained in 79% yield (69 mg). The er value was determined by HPLC analysis on two columns attached one after the other with Chiralcel ADH followed by Chiralcel IC column (5% isopropanol in hexanes, 0.5 mL/min) with  $t_r$  = 52.00 min and 92.01 min (minor), 54.39 min (major): 97:3 er.  $^1\text{H}$  NMR (600 MHz,  $\text{CDCl}_3$ ) (66:34 mixture of rotamers, peaks corresponding to minor rotamer starred)  $\delta$  8.02-7.93 (m, 1.32H), 7.86-7.80 (m, 0.68H), 7.40-7.34 (m, 1.32H), 7.02-6.95 (m, 2.34H), 6.69-6.62 (m, 0.34H), 5.90 (dd,  $J$  = 8.4, 4.1 Hz, 0.66H), 4.92 (d,  $J$  = 7.6 Hz, 0.34H), 4.37-4.24 (m, 0.66H), 3.62-3.48 (m, 1.34H), 2.95 (p,  $J$  = 6.8 Hz, 0.66H), 2.92-2.75 (m, 1.65H), 2.69-2.42 (m, 4.4H), 2.34-2.24 (m, 0.34H), 2.45-2.13 (m, 0.66H), 2.15-1.91 (m, 1.95H), 1.84-1.80 (m, 0.34H), 1.35-1.31 (m, 3H), 1.31-1.22 (m, 9H), 1.22-1.17 (m, 2H), 1.15 (d,  $J$  = 6.7 Hz, 2H), 1.10 (d,  $J$  = 6.7 Hz, 1H), 0.08 (d,  $J$  = 6.8 Hz, 1H).  $^{13}\text{C}$  NMR (150 MHz,  $\text{CDCl}_3$ )  $\delta$  200.21\*, 199.75, 197.58, 197.38\*, 148.79, 147.68, 146.62\*, 143.45\*, 142.56, 141.34, 141.17\*, 138.28, 137.81\*, 136.25\*, 135.96, 128.79, 128.67\*, 126.25, 125.91\*, 121.74, 121.50, 120.95\*, 66.44\*, 65.98, 54.18, 53.19\*, 34.72\*, 34.66, 34.22, 34.14\*, 31.29, 30.89, 30.63, 30.29, 26.61, 25.71\*, 25.63\*, 25.26, 24.59, 24.08\*, 24.02, 23.99, 23.94\*, 23.29, 23.19\*, 21.54\*, 21.44. HRMS (ESI-TOF) Calcd for  $\text{C}_{28}\text{H}_{38}\text{NOS}$   $[\text{M}+\text{H}]^+$ : 436.2669; found:436.2664.

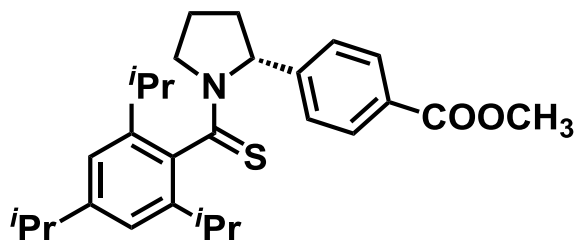

**Methyl (R)-4-(1-(2,4,6-triisopropylphenylcarbonothioyl)pyrrolidin-2-yl)benzoate (3m)**

Following the general procedure for the enantioselective arylation with 2 equiv. of 1,4-BQ, the title compound was obtained in 72% yield (65 mg). The er value was determined by HPLC analysis on two Chiralcel ADH columns attached one after the other (5% isopropanol in hexanes, 0.5 mL/min) with  $t_r$  = 16.15 min (minor), 18.43 min (major): 94.5:5.5 er.  $^1\text{H}$  NMR (600 MHz,  $\text{CDCl}_3$ ) (32:68 mixture of rotamers, peaks

corresponding to minor rotamer starred)  $\delta$  8.07-8.02 (m, 0.64H)\*, 7.92-7.87 (m, 1.36H), 7.37-7.31 (m, 0.64H)\*, 6.99 (s, 0.64H)\*, 6.96 (d,  $J = 1.6$  Hz, 0.68H), 6.96-6.93 (m, 1.36H), 6.66 (d,  $J = 1.8$  Hz, 0.68H), 5.90 (dd,  $J = 8.4, 4.0$  Hz, 0.32H)\*, 4.91 (d,  $J = 7.5$  Hz, 0.68H), 4.35-4.23 (m, 1.36H), 3.92 (s, 0.96H)\*, 3.90 (s, 2.04H), 3.60-3.54 (m, 0.32H)\*, 3.54-3.48 (m, 0.32H)\*, 2.94 (hept,  $J = 6.9$  Hz, 0.32H)\*, 2.90-2.75 (m, 1.32H), 2.64 (hept,  $J = 6.9$  Hz, 0.68H), 2.58-2.42 (m, 1.00H), 2.32-2.23 (m, 0.68H), 2.23-2.13 (m, 1.36H), 2.13-1.99 (m, 0.64H)\*, 2.00-1.91 (m, 0.32H)\*, 1.84-1.78 (m, 0.68H), 1.35-1.30 (m, 3.00H), 1.28-1.22 (m, 5.88H), 1.18 (dd,  $J = 6.9, 4.0$  Hz, 4.08H), 1.14 (d,  $J = 6.7$  Hz, 0.96H)\*, 1.09 (d,  $J = 6.7$  Hz, 2.04H), 0.09 (d,  $J = 6.8$  Hz, 2.04H).  $^{13}\text{C}$  NMR (150 MHz,  $\text{CDCl}_3$ ) (mixture of rotamers, peaks corresponding to minor rotamer starred)  $\delta$  200.2, 199.7\*, 166.8\*, 166.6, 148.8, 148.7\*, 147.4\*, 146.4, 143.5, 142.6\*, 141.3\*, 141.1, 138.3\*, 137.8, 130.0\*, 129.9, 129.3, 128.9\*, 126.1\*, 125.7, 121.7\*, 121.5, 121.5\*, 120.9, 66.5, 66.0\*, 54.1\*, 53.2, 52.2, 52.1\*, 34.7, 34.6\*, 34.2\*, 34.1, 31.3, 30.9\*, 30.6, 30.3\*, 25.7, 25.6, 25.3\*, 24.6\*, 24.1\*, 24.0, 23.9, 23.3\*, 23.2, 21.5, 21.5. HRMS (ESI-TOF) Calcd for  $\text{C}_{28}\text{H}_{38}\text{NO}_2\text{S}$   $[\text{M}+\text{H}]^+$ : 452.2618; found: 452.2616.

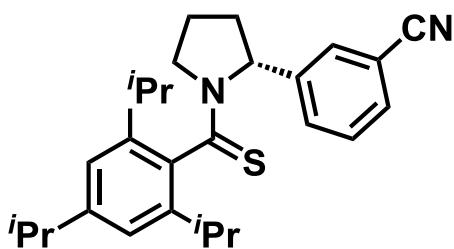

**(R)-3-(1-(2,4,6-triisopropylphenylcarbonothioyl)pyrrolidin-2-yl)benzonitrile (3n)**

Following the general procedure for the enantioselective arylation with 2 equiv. of 1,4-BQ, the title compound was obtained in 68% yield (57 mg). The er value was determined by HPLC analysis on two columns attached one after the other with Chiralcel ADH followed by Chiralcel IC column (5% isopropanol in hexanes, 0.5 mL/min) with  $t_r = 39.68$  min (major), 43.77 min and 55.29 min (minor): 87.5:12.5 er.  $^1\text{H}$  NMR (600 MHz,  $\text{CDCl}_3$ ) (72:28 mixture of rotamers, peaks corresponding to minor rotamer starred)  $\delta$  7.58 (dt,  $J = 7.5, 1.4$  Hz, 0.72H), 7.56-7.54 (m, 0.72H), 7.53-7.50 (m, 1.00H), 7.48 (td,  $J = 7.7, 0.6$  Hz, 0.72H), 7.36 (td,  $J = 7.7, 0.7$  Hz, 0.28H)\*, 7.14-7.10 (m, 0.56H)\*, 6.99 (d,  $J = 0.5$  Hz, 1.44H), 6.98 (d,  $J = 1.7$  Hz, 0.28H)\*, 6.68 (d,  $J = 1.7$  Hz, 0.28H)\*, 5.86 (dd,  $J = 8.4, 4.1$  Hz, 0.72H), 4.88 (d,  $J = 7.7$  Hz, 0.28H)\*, 4.36-4.22 (m, 0.56H)\*, 3.61-3.54 (m, 0.72H), 3.54-3.48 (m, 0.72H), 2.92-2.77 (m, 2.44H), 2.66-2.51 (m, 1.00H), 2.43 (hept,  $J$

= 6.8 Hz, 0.28H)\*, 2.35-2.25 (m, 0.28H)\*, 2.24-2.12 (m, 0.56H)\*, 2.12-1.94 (m, 2.16H), 1.82 (dd,  $J = 12.5, 6.1$  Hz, 0.28H)\*, 1.34 (dd,  $J = 7.0, 3.9$  Hz, 3.00H), 1.27 (d,  $J = 6.9$  Hz, 2.16H), 1.25-1.21 (m, 7.32H), 1.20 (dd,  $J = 6.9, 3.9$  Hz, 1.68H)\*, 1.16 (d,  $J = 6.7$  Hz, 2.16H), 1.11 (d,  $J = 6.7$  Hz, 0.84H)\*, 0.15 (d,  $J = 6.8$  Hz, 0.84H)\*.  $^{13}\text{C}$  NMR (150 MHz,  $\text{CDCl}_3$ ) (mixture of rotamers, peaks corresponding to minor rotamer starred)  $\delta$  200.6\*, 200.0, 149.0\*, 148.9, 143.7, 143.4\*, 143.1\*, 142.6, 141.3, 141.2\*, 138.1, 137.6\*, 131.2, 131.1\*, 130.8, 130.0\*, 129.5\*, 129.4, 129.4, 129.3\*, 121.8, 121.5, 121.5\*, 121.1\*, 118.7, 118.3\*, 112.9\*, 112.6, 65.9\*, 65.4, 54.1, 53.1\*, 34.8\*, 34.6, 34.2, 34.1\*, 31.3\*, 30.9, 30.7\*, 30.4, 25.7\*, 25.6\*, 25.2, 24.5, 24.1, 24.0, 24.0, 23.9\*, 23.3, 23.1\*, 21.6\*, 21.4\*. HRMS (ESI-TOF) Calcd for  $\text{C}_{27}\text{H}_{35}\text{N}_2\text{S}$   $[\text{M}+\text{H}]^+$ : 419.2515; found: 419.2524.

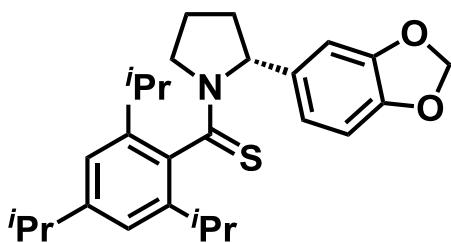

**(R)-2-(1,3-dihydroisobenzofuran-5-yl)pyrrolidin-1-yl(2,4,6-triisopropylphenyl)methanethione (3o)**

Following the general procedure for the enantioselective arylation, the title compound was obtained in 78% yield (68 mg). The er value was determined by HPLC analysis on two Chiralcel IC columns attached one after the other (5% isopropanol in hexanes, 0.5 mL/min) with  $t_r = 25.66$  min 41.48 min (minor), 27.13 min and 39.19 min (major): 93.5:6.5 er.  $^1\text{H}$  NMR (600 MHz,  $\text{CDCl}_3$ ) (60:40 mixture of rotamers, peaks corresponding to minor rotamer starred)  $\delta$  6.98 (s, 1.20H), 6.95 (d,  $J = 1.6$  Hz, 0.40H)\*, 6.79 (dd,  $J = 7.9, 0.5$  Hz, 0.60H), 6.76-6.73 (m, 1.00H), 6.73-6.71 (m, 0.60H), 6.63 (d,  $J = 8.0$  Hz, 0.40H)\*, 6.36 (d,  $J = 1.8$  Hz, 0.40H)\*, 6.26 (ddd,  $J = 8.1, 1.9, 0.6$  Hz, 0.40H)\*, 5.98-5.95 (m, 1.20H), 5.90 (dd,  $J = 10.0, 1.4$  Hz, 0.80H)\*, 5.81 (dd,  $J = 8.2, 3.7$  Hz, 0.60H), 4.77 (d,  $J = 6.5$  Hz, 0.40H)\*, 4.29-4.18 (m, 0.80H)\*, 3.54-3.43 (m, 1.20H), 2.95 (hept,  $J = 6.9$  Hz, 0.60H), 2.90-2.76 (m, 1.60H), 2.62 (hept,  $J = 6.8$  Hz, 0.40H)\*, 2.54 (hept,  $J = 6.7$  Hz, 0.40H)\*, 2.49-2.40 (m, 0.60H), 2.26-2.15 (m, 1.00H), 2.15-2.04 (m, 0.80H)\*, 2.03-1.97 (m, 0.60H), 1.95-1.87 (m, 0.60H), 1.84-1.76 (m, 0.40H)\*, 1.31 (d,  $J = 6.9$  Hz, 1.20H)\*, 1.29 (d,  $J = 6.9$  Hz, 1.80H), 1.25 (dd,  $J = 6.8, 0.9$  Hz, 3.60H), 1.24-1.21



(m, 4.80H), 1.20 (dd,  $J = 6.9, 3.4$  Hz, 2.40H)\*, 1.16 (d,  $J = 6.7$  Hz, 1.80H), 1.13 (d,  $J = 6.7$  Hz, 1.20H)\*, 0.31 (d,  $J = 6.7$  Hz, 1.20H)\*.  $^{13}\text{C}$  NMR (150 MHz,  $\text{CDCl}_3$ ) (mixture of rotamers, peaks corresponding to minor rotamer starred)  $\delta$  200.1\*, 199.5, 148.8, 148.8\*, 148.1, 148.1\*, 147.0\*, 146.7, 143.9\*, 142.8, 141.5, 141.3\*, 138.7, 138.1\*, 136.2, 135.6\*, 121.9, 121.7, 121.0\*, 119.3, 119.1\*, 108.5, 108.4\*, 107.0, 106.5\*, 101.3, 101.3\*, 66.7\*, 66.0, 54.1, 53.4\*, 35.2\*, 34.9, 34.4, 34.4\*, 31.6\*, 31.1, 30.8\*, 30.4, 25.9\*, 25.9\*, 25.5, 24.9, 24.3\*, 24.2, 24.2, 24.2\*, 24.0, 23.5, 23.4\*, 21.8\*, 21.8\*. HRMS (ESI-TOF) Calcd for  $\text{C}_{27}\text{H}_{36}\text{NO}_2\text{S}$   $[\text{M}+\text{H}]^+$ : 438.2461; found: 438.2466.

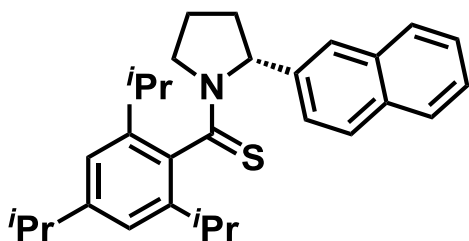

**(*R*)-2-(naphthalen-2-yl)pyrrolidin-1-yl(2,4,6-triisopropylphenyl)methanethione (3p)**

Following the general procedure for the enantioselective arylation, the title compound was obtained in 78% yield (69 mg). The er value was determined by HPLC analysis on two Chiralcel IC columns attached one after the other (1% isopropanol in hexanes, 0.5 mL/min) with  $t_r = 32.43$  min and 57.35 min (minor), 33.75 min and 40.76 min (major): 98:2 er.  $^1\text{H}$  NMR (600 MHz,  $\text{CDCl}_3$ ) (83:17 mixture of rotamers, peaks corresponding to minor rotamer starred)  $\delta$  7.88-7.86 (m, 0.83H), 7.86-7.83 (m, 0.83H), 7.80-7.75 (m, 1.00H), 7.73-7.69 (m, 0.34H)\*, 7.68 (dd,  $J = 1.8, 0.8$  Hz, 0.83H), 7.51-7.44 (m, 2.00H), 7.42 (dd,  $J = 8.4, 1.9$  Hz, 0.83H), 7.27 (s, 0.17H)\*, 7.01 (q,  $J = 1.7$  Hz, 1.66H), 6.98 (dd,  $J = 8.0, 1.8$  Hz, 0.34H)\*, 6.58 (d,  $J = 1.7$  Hz, 0.17H)\*, 6.07 (dd,  $J = 8.3, 3.3$  Hz, 0.83H), 5.03 (d,  $J = 7.0$  Hz, 0.17H)\*, 4.36 (dd,  $J = 9.3, 5.1$  Hz, 0.34H)\*, 3.64-3.55 (m, 1.66H), 3.11 (hept,  $J = 6.8$  Hz, 0.83H), 2.90 (dhept,  $J = 24.0, 6.9$  Hz, 1.66H), 2.78 (hept,  $J = 6.9$  Hz, 0.17H)\*, 2.71 (hept,  $J = 6.8$  Hz, 0.17H)\*, 2.59-2.49 (m, 1.00H), 2.36-2.22 (m, 0.34H)\*, 2.21-2.07 (m, 1.83H), 2.01-1.89 (m, 1.00H), 1.42 (d,  $J = 7.0$  Hz, 2.49H), 1.38 (d,  $J = 6.9$  Hz, 0.51H)\*, 1.28 (dd,  $J = 11.3, 6.8$  Hz, 4.98H), 1.26-1.23 (m, 5.49H), 1.18 (dd,  $J = 6.9, 5.1$  Hz, 1.02H)\*, 1.14 (d,  $J = 6.7$  Hz, 2.49H), 1.06 (d,  $J = 6.7$  Hz, 0.51H)\*, - 0.25 (d,  $J = 6.8$  Hz, 0.51H)\*.  $^{13}\text{C}$  NMR (150 MHz,  $\text{CDCl}_3$ ) (mixture of rotamers, peaks corresponding to minor rotamer starred)  $\delta$  200.0\*, 199.3, 148.6, 148.6\*, 143.7\*, 142.6,

141.4, 141.1\*, 139.4, 138.6\*, 138.5, 137.9\*, 133.4, 133.2\*, 132.6, 132.5\*, 128.5, 128.4\*, 127.8, 127.7, 127.5\*, 126.4\*, 126.2, 126.0\*, 125.7, 124.7, 124.4\*, 124.2, 123.7\*, 121.7, 121.5, 121.4\*, 120.8\*, 66.9\*, 66.2, 54.1, 53.3\*, 34.7\*, 34.5, 34.2, 34.1\*, 31.2\*, 30.9, 30.6\*, 30.3, 25.7\*, 25.7\*, 25.3, 24.7, 24.3, 24.0, 24.0, 23.9\*, 23.9, 23.3, 23.2\*, 21.6\*, 21.2\*. HRMS (ESI-TOF) Calcd for C<sub>30</sub>H<sub>38</sub>NS [M+H]<sup>+</sup>: 444.2719; found: 444.2710.

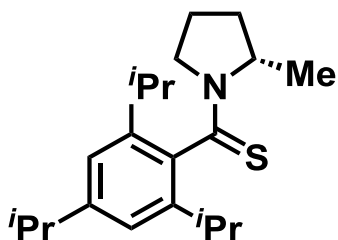

**(S)-(2-methylpyrrolidin-1-yl)(2,4,6-triisopropylphenyl)methanethione (3q)**

Following the general procedure for the enantioselective arylation with Na<sub>2</sub>CO<sub>3</sub> as the base (instead of KHCO<sub>3</sub>), 12 equiv. of MeB(OH)<sub>2</sub> at 0.05M concentration at 80 °C under air, the title compound was obtained in 47% yield (31.2 mg). The er value was determined by HPLC analysis on Chiralcel IC column (1% isopropanol in hexanes, 0.5 mL/min) with t<sub>r</sub> = 12.30 min (major), 13.26 min (minor): 87.5:12.5 er. <sup>1</sup>H NMR (600 MHz, CDCl<sub>3</sub>) (75:25 mixture of rotamers, peaks corresponding to minor rotamer starred) δ 6.98-6.95 (m, 2.00H), 5.05-4.97 (m, 0.75H), 4.15-4.07 (m, 0.25H)\*, 4.00-3.94 (m, 0.25H)\*, 3.91 (p, J = 6.8 Hz, 0.25H)\*, 3.28-3.19 (m, 1.50H), 2.93-2.81 (m, 2.75H), 2.58 (hept, J = 6.8 Hz, 0.25H)\*, 2.24-2.08 (m, 1.25H), 2.06-1.95 (m, 1.00H), 1.90-1.83 (m, 0.75H), 1.83-1.77 (m, 0.75H), 1.73-1.67 (m, 0.25H)\*, 1.49 (d, J = 6.4 Hz, 2.25H), 1.31 (d, J = 6.6 Hz, 0.75H)\*, 1.28-1.21 (m, 9.75H), 1.19 (dd, J = 7.0, 5.3 Hz, 4.50H), 0.97 (d, J = 6.6 Hz, 0.75H)\*. <sup>13</sup>C NMR (150 MHz, CDCl<sub>3</sub>) (mixture of rotamers, peaks corresponding to minor rotamer starred) δ 197.2, 197.2\*, 148.5\*, 148.4, 143.3\*, 142.0, 141.3\*, 141.2, 138.7, 137.8\*, 121.5, 121.4, 121.4\*, 121.2\*, 58.7\*, 57.7, 52.4, 51.6\*, 34.2, 34.2\*, 32.7\*, 32.0, 31.2\*, 30.7, 30.6\*, 30.1, 26.2\*, 25.6\*, 25.2, 24.8, 24.0, 24.0, 24.0\*, 23.7, 23.6, 23.4, 22.9\*, 22.6\*, 22.0\*, 19.1\*, 17.2. HRMS (ESI-TOF) Calcd for C<sub>21</sub>H<sub>34</sub>NS [M+H]<sup>+</sup>: 332.2406; found: 332.2409.

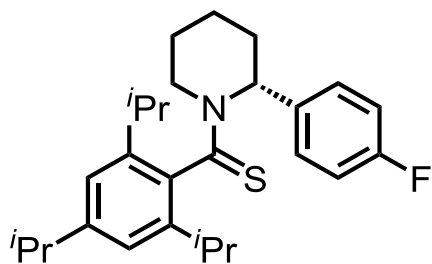

**(R)-2-(4-fluorophenyl)piperidin-1-yl(2,4,6-triisopropylphenyl)methanethione (4a)**

Following the general procedure for the enantioselective arylation with 3 equiv. of arylboronic acid, 5 equiv. of 1,4-BQ at 85 °C, the title compound was obtained in 48% yield (40.7 mg). The er value was determined by HPLC analysis on a Chiralcel ADH column (5% isopropanol in hexanes, 0.5 mL/min) with  $t_r$  = 9.37 min (major), 14.85 min (minor): 94.5:5.5 er.  $^1\text{H}$  NMR (600 MHz,  $\text{CDCl}_3$ ) (82:18 mixture of rotamers, peaks corresponding to minor rotamer starred)  $\delta$  7.49-7.41 (m, 1.64H), 7.38 (d,  $J$  = 4.7 Hz, 0.18H)\*, 7.16-7.12 (m, 2H), 7.04-6.95 (m, 2.18H), 6.82-6.81 (m, 0.18H)\*, 5.25-5.22 (m, 0.18H)\*, 3.74 (d,  $J$  = 14.4 Hz, 0.82H), 3.42-3.36 (m, 0.18H)\*, 3.05-2.95 (m, 2.46H), 2.91-2.76 (m, 1.18H), 2.51 (d,  $J$  = 18.0 Hz, 0.82H), 2.19 (d,  $J$  = 18.0 Hz, 0.18H)\*, 2.15-2.06 (m, 1H), 1.85-1.71 (m, 2H), 1.69-1.65 (m 0.36H)\*, 1.61-1.46 (m, 2H), 1.36-1.15 (m, 16H), 1.12 (d,  $J$  = 7.0 Hz, 2.31H), 0.55 (d,  $J$  = 6.8 Hz, 0.54H)\*.  $^{13}\text{C}$  NMR (150 MHz,  $\text{CDCl}_3$ )  $\delta$  202.62\*, 201.18, 161.88 (d,  $J$  = 246.2 Hz), 161.59\* (d,  $J$  = 246.7 Hz), 148.49, 148.28\*, 142.99\*, 142.25, 142.09\*, 141.88, 136.97, 136.61\*, 134.00\*, 133.82, 128.72\* (d,  $J$  = 7.8 Hz), 128.32 (d,  $J$  = 7.9 Hz), 125.50\*, 121.90\*, 121.66, 121.50, 121.31\*, 115.54 (d,  $J$  = 21.3 Hz), 115.52\* (d,  $J$  = 20.9 Hz)\*, 60.99\*, 56.53, 47.56, 45.47\*, 34.14, 31.92\*, 31.15\*, 30.85, 30.61, 30.31, 29.70, 29.66\*, 27.40, 26.02, 25.94\*, 25.77, 25.60\*, 25.51\*, 24.52, 23.98, 23.89\*, 23.59, 23.49, 23.39\*, 23.01\*, 22.69\*, 19.20, 19.12\*. HRMS (ESI-TOF) Calcd for  $\text{C}_{27}\text{H}_{37}\text{FN}$   $[\text{M}+\text{H}]^+$ : 426.2625; found: 426.2628.

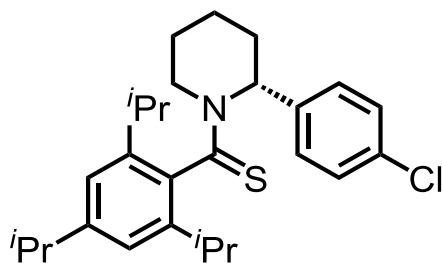

**(R)-2-(4-chlorophenyl)piperidin-1-yl(2,4,6-triisopropylphenyl)methanethione (4b)**

Following the general procedure for the enantioselective arylation with 3 equiv. of aryl boronic acid, 5 equiv. of 1,4-BQ at 85 °C, the title compound was obtained in 53% yield (46.8 mg). The er value was determined by HPLC analysis on a Chiralcel ADH column (2% isopropanol in hexanes, 0.5 mL/min) with  $t_r$ = 12.25 min (major), 24.05 min (minor): 94.5:5.5 er.  $^1\text{H}$  NMR (600 MHz,  $\text{CDCl}_3$ ) (70:30 mixture of rotamers, peaks corresponding to minor rotamer starred)  $\delta$  7.42-7.35 (m, 3.3H), 7.32-7.29 (m, 0.7H), 7.13-7.10 (m, 0.7H), 7.01-6.95 (m, 1.7H), 6.82 (d,  $J$  = 1.7 Hz, 0.3H)\*, 6.03 (d,  $J$  = 13.8 Hz, 0.3H)\*, 5.23 (brs, 0.3H)\*, 4.32-4.24 (m, 0.3H)\*, 4.17-4.09 (m, 0.3H)\*, 3.75 (d,  $J$  = 13.3 Hz, 0.7H), 3.41-3.33 (m, 0.3H)\*, 3.04-2.95 (m, 2.1H), 2.91-2.78 (m, 1.3H), 2.50 (d,  $J$  = 14.6 Hz, 0.7H), 2.32-2.29 (m, 0.3H)\*, 2.19 (d,  $J$  = 14.0 Hz, 0.3H)\*, 2.14-1.44 (m, 5H), 1.37-1.11 (16H) 0.88-0.89 (m, 0.9H)\*, 0.56 (d,  $J$  = 6.8 Hz, 0.9H)\*.  $^{13}\text{C}$  NMR (150 MHz,  $\text{CDCl}_3$ )  $\delta$  202.72\*, 201.39, 148.53, 148.33\*, 142.99\*, 142.25, 142.11\*, 141.90, 136.91, 136.87\*, 136.63, 136.55\*, 133.95\*, 133.02, 132.83\*, 128.86, 128.77\*, 128.44, 128.12\*, 121.92\*, 121.67, 121.52, 121.33\*, 61.02\*, 56.67, 47.66, 45.51\*, 34.23\*, 34.15, 34.06\*, 34.03\*, 31.93, 31.15\*, 30.85, 30.68, 30.46\*, 29.71, 29.66, 27.35, 25.97, 25.94\*, 25.77, 25.60\*, 25.47\*, 24.52, 23.98, 23.92\*, 23.88\*, 23.64, 23.48, 23.39\*, 23.0\*9, 22.69\*, 19.18, 14.12\*. HRMS (ESI-TOF) Calcd for  $\text{C}_{27}\text{H}_{37}\text{ClNS}$   $[\text{M}+\text{H}]^+$ : 442.2330; found: 442.2333.

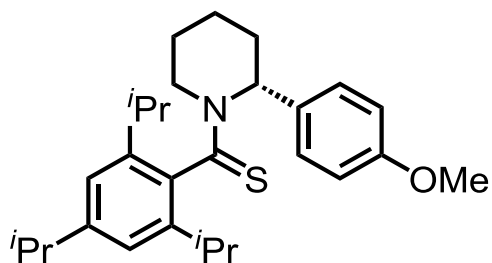

**(R)-2-(2-(4-methoxyphenyl)piperidin-1-yl)(2,4,6-triisopropylphenyl)methanethione  
(4c)**

Following the general procedure for the enantioselective arylation with 3 equiv. of aryl boronic acid, 5 equiv. of 1,4-BQ at 85 °C, the title compound was obtained in 66% yield (58 mg). The er value was determined by HPLC analysis on a Chiralcel ADH column (5% isopropanol in hexanes, 0.5 mL/min) with  $t_r$ = 17.40 min (major), 26.05 min (minor): 96:4 er.  $^1\text{H}$  NMR (600 MHz,  $\text{CDCl}_3$ ) (89:11 mixture of rotamers, peaks corresponding to minor rotamer starred)  $\delta$  7.40 (d,  $J$  = 8.6 Hz, 1.78H), 7.36 (d,  $J$  = 4.5 Hz, 0.89H), 7.08 (d,

$J = 8.6$  Hz, 0.22H)\*, 6.99 (s, 0.89H), 6.97-6.95 (m, 1H), 6.92 (d,  $J = 8.7$  Hz, 0.89H), 6.87-6.81 (m, 0.33H)\*, 6.03-5.98 (m, 0.11H)\*, 5.23-5.20 (m, 0.11)\*, 3.83 (s, 2.67H), 3.79 (s, 0.33H)\*, 3.71 (d,  $J = 12.5$  Hz, 0.89H), 3.10-2.97 (m, 2.67H), 2.93-2.78 (m, 1H), 2.51 (d,  $J = 14.2$  Hz, 0.89H), 2.34-2.38 (m, 0.11H)\*, 2.13-2.00 (m, 1.11H), 1.88-1.47 (m, 3.33H), 1.37-1.17 (m, 17H), 1.12 (d,  $J = 6.9$  Hz, 2.67H), 0.59 (d,  $J = 6.8$  Hz, 0.33H)\*.  $^{13}\text{C}$  NMR (150 MHz,  $\text{CDCl}_3$ )  $\delta$  200.72, 158.63, 158.35\*, 148.35, 148.33\*, 143.03\*, 142.26, 142.10\*, 141.90, 137.16, 136.74, 130.01, 128.21, 127.79\*, 121.88\*, 121.62, 121.46, 121.23\*, 114.03, 56.64, 55.29, 47.51, 34.14, 31.92, 31.15, 30.83, 30.56, 29.70, 27.38, 26.13, 25.96\*, 25.78\*, 25.64, 24.55, 23.99, 23.64, 23.52, 19.26, 19.16\*. HRMS (ESI-TOF) Calcd for  $\text{C}_{28}\text{H}_{40}\text{NOS}$   $[\text{M}+\text{H}]^+$ : 438.2825; found: 438.2832.

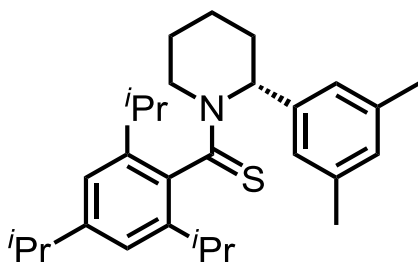

**(R)-2-(2-(3,5-dimethylphenyl)piperidin-1-yl)(2,4,6-triisopropylphenyl)methanethione**

**(4d)**

Following the general procedure for the enantioselective arylation with 3 equiv. of aryl boronic acid, 5 equiv. of 1,4-BQ at 85°C, the title compound was obtained in 76% yield (66 mg). The er value was determined by HPLC analysis on a Chiralcel ADH column (0.5% isopropanol in hexanes, 0.5 mL/min) with  $t_r = 9.41$  min (minor), 12.07 min (major): 92.5:7.5 er.  $^1\text{H}$  NMR (600 MHz,  $\text{CDCl}_3$ ) (73:27 mixture of rotamers, peaks corresponding to minor rotamer starred)  $\delta$  7.35 (d,  $J = 4.1$  Hz, 0.73H), 7.05 (s, 1.46H), 7.00 (d,  $J = 1.6$  Hz, 0.73 H), 6.98 (d,  $J = 1.6$  Hz, 0.73H), 6.95 (d,  $J = 1.6$  Hz, 0.27H)\*, 6.93 (s, 0.73H), 6.84 (s, 0.27H)\*, 6.81 (d,  $J = 1.6$  Hz, 0.27H)\*, 6.74 (s, 0.54H)\*, 6.02 (d,  $J = 12.8$  Hz, 0.27H)\*, 5.18 (s, 0.27H)\*, 3.74 (d,  $J = 12.9$  Hz, 0.73H), 3.49-3.42 (m, 0.27H)\*, 3.16 (hept,  $J = 6.9$  Hz, 0.73H), 3.11-2.91 (m, 2H), 2.90-2.76 (m 1H), 2.59-2.50 (m, 0.73H), 2.34 (s, 4.38H), 2.28 (s, 1.62H), 2.10-2.01 (m, 0.73H), 1.97-1.89 (m, 0.27H)\*, 1.84-1.48 (m, 4.16H), 1.36-1.16 (m, 17.19), 0.58 (d,  $J = 6.8$  Hz, 0.81H).  $^{13}\text{C}$  NMR (150 MHz,  $\text{CDCl}_3$ )  $\delta$  202.02\*, 200.72, 148.35, 148.09\*, 142.93\*, 142.28, 142.07\*,

141.85, 138.22, 138.09\*, 137.94\*, 137.72, 137.18, 136.70\*, 128.64, 128.43\*, 124.61, 124.37\*, 121.88\*, 121.66, 121.46, 121.17\*, 61.64\*, 57.27, 47.73, 45.62\*, 34.14, 34.03\*, 31.15\*, 30.81, 30.68\*, 30.64, 30.36\*, 27.39, 26.11, 25.94\*, 25.80, 25.76\*, 25.51\*, 24.67, 23.99, 23.92\*, 23.71, 23.52, 23.38\*, 22.74\*, 21.55, 21.50\*, 19.35\*, 19.28. HRMS (ESI-TOF) Calcd for C<sub>29</sub>H<sub>42</sub>NS [M+H]<sup>+</sup>: 436.3032; found: 436.3032.

#### Removal of the directing group:

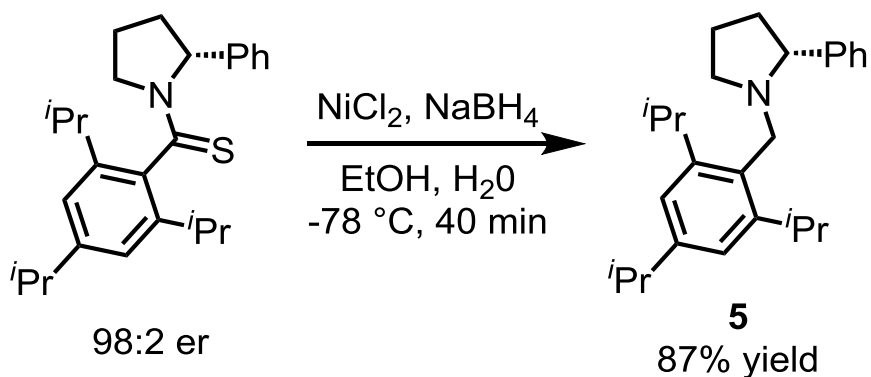

#### (*R*)-2-phenyl-1-(2,4,6-triisopropylbenzyl)pyrrolidine (**5**)

The thioamide (0.1mmol, 39.3 mg) and NiCl<sub>2</sub>·6H<sub>2</sub>O (0.8mmol, 190 mg) were taken in a reaction vial with a stir bar and 2 ml of ethanol was added. Then the vial was cooled to -78 °C . NaBH<sub>4</sub> (2.5 mmol, 94.6 mg) was dissolved in 0.4ml of water and immediately added drop wise (over 10 sec) to the solution, at this stage the solution turns black and was kept at -78°C for 40 min. Then ethyl acetate was added (at low temp) and the reaction mixture was quickly filtered through pad of Celite. The solvent was then removed under reduced pressure and the residue was purified on a preparative TLC with ethyl acetate and hexanes (1:20) as the eluent. The dethiolated product was obtained as an oil in 87% yield (31.5 mg). <sup>1</sup>H NMR (600 MHz, CDCl<sub>3</sub>) δ 7.44-7.41 (m, 2H), 7.33 (t, *J* = 7.6 Hz, 2H), 7.28-7.23 (m, 1H), 6.91 (s, 2H), 3.50 (d, *J* = 12.7 Hz, 1H), 3.37-3.25 (m, 4H), 2.91-2.78 (m, 2H), 2.30 (q, *J* = 8.4, 7.5 Hz, 1H), 2.25-2.16 (m, 1H), 1.85-1.66 (m, 3H), 1.22 (d, *J* = 6.9 Hz, 6H), 1.16 (d, *J* = 6.8 Hz, 6H), 1.05 (d, *J* = 6.9 Hz, 6H). <sup>13</sup>C NMR (150 MHz, CDCl<sub>3</sub>) δ 148.15, 146.94, 144.03, 130.29, 128.24, 127.96, 127.06, 120.63, 70.64, 52.94, 49.12, 34.76, 34.04, 28.49, 25.03, 24.04, 23.95, 23.50, 23.04. HRMS (ESI-TOF) Calcd for C<sub>26</sub>H<sub>38</sub>N [M+H]<sup>+</sup>: 364.2999; found: 364.2990.

Note: When the dethiolation was done at room temperature partial racemization of the final product was observed.

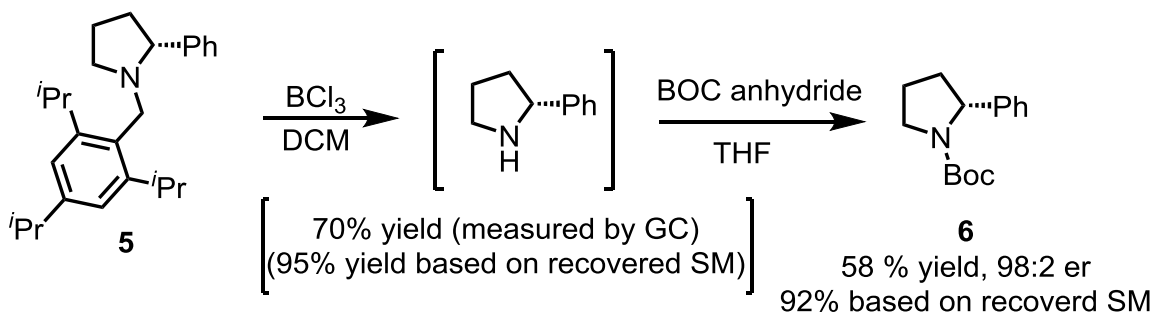

### *t*-butyl (*R*)-2-phenylpyrrolidine-1-carboxylate (**6**)

The benzyl amine (0.1 mmol, 36 mg) and 2 ml dichloromethane were taken in a reaction vial equipped with a stir bar. Then boron trichloride, 0.2 mmol, 0.19 ml of 1 M solution (from a fresh bottle of 1M solution of boron trichloride in dichloromethane) was added at room temperature and the solution was stirred at this temperature for 24 hrs. (The reaction was monitored on GC after base workup). Then 1 ml of 1M HCl was added carefully and stirred for 2 min, followed by addition of saturated NaHCO<sub>3</sub> solution to make the pH >10. Then the organic layer was separated and the aqueous layer was extracted with more dichloromethane. The organic layers were combined, dried over Na<sub>2</sub>SO<sub>4</sub>, and the solvent was removed under reduced pressure. Then 1ml of THF was added along with 2 equiv of Boc anhydride and the reaction was stirred for 8 hours. Then the solvent was removed and the residue was purified over preparative TLC with ethyl acetate and hexanes (1:10) as eluent to obtain the title compound in 58% yield (14.2 mg) as colorless oil. The er value was determined by HPLC analysis on a Chiralcel IC column (5% isopropanol in hexanes, 0.5 mL/min) with  $t_r = 17.92$  min (major), 21.72 min (minor): 98:2 er. <sup>1</sup>H NMR (600 MHz, CDCl<sub>3</sub>) (70:30 mixture of rotamers, peaks corresponding to minor rotamer starred)  $\delta$  7.29 (t,  $J = 7.6$  Hz, 2H), 7.23-7.14 (m, 3H), 4.96 (s, 0.3H), 4.76 (s, 0.7H), 3.71-3.44 (m, 2H), 2.38-2.20 (m, 1H), 1.96-1.77 (m, 3H), 1.46 (s, 3H), 1.18 (s, 6H). <sup>13</sup>C NMR (150 MHz, CDCl<sub>3</sub>)  $\delta$  154.55, 145.11, 144.02\*, 128.06, 126.43, 125.47, 79.12, 61.31, 60.60\*, 47.06, 35.99, 34.78\*, 28.49\*, 28.10, 23.41\*, 23.16. HRMS (ESI-TOF) Calcd for C<sub>15</sub>H<sub>22</sub>NO<sub>2</sub> [M+H]<sup>+</sup>: 248.1645; found: 248.1648.

Application towards synthesis of CERC-501

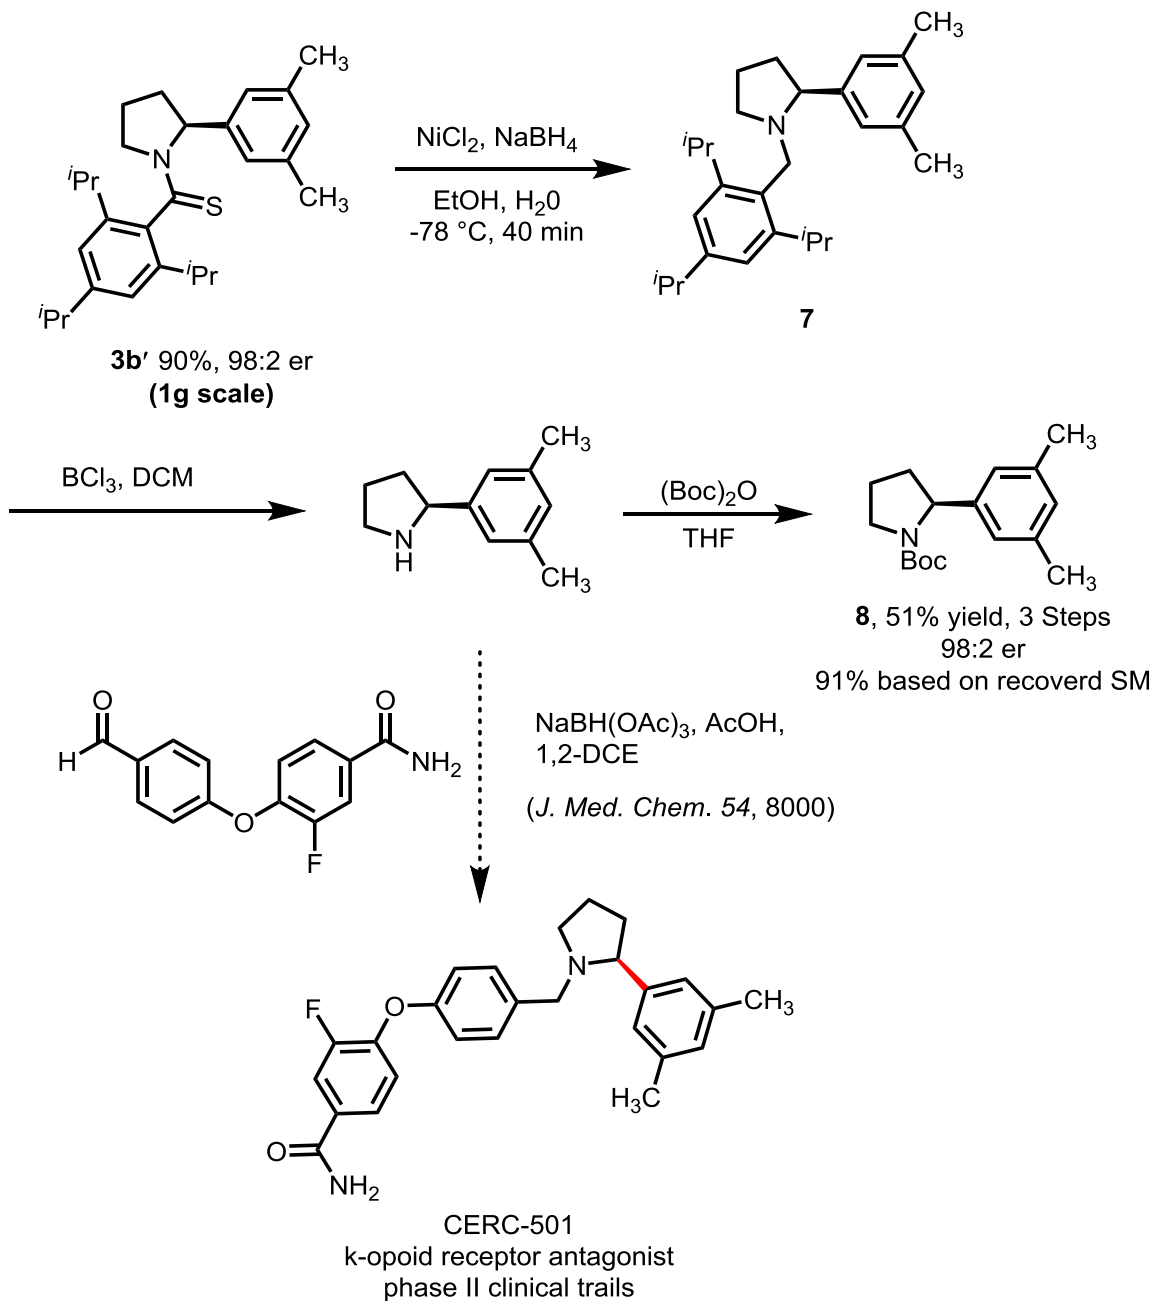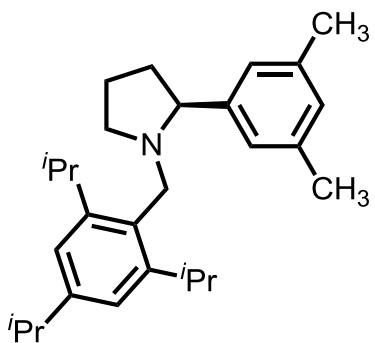



**(S)-2-(3,5-dimethylphenyl)-1-(2,4,6-triisopropylbenzyl)pyrrolidine (7)**

The title compound was obtained by following the method used to synthesize compound **5**. The dethiolated product was obtained as an oil in 85% yield.  $^1\text{H}$  NMR (600 MHz,  $\text{CDCl}_3$ )  $\delta$  7.07 (s, 2H), 6.95-6.89 (m, 3H), 3.54 (d,  $J = 12.7$  Hz, 1H), 3.40 (m, 2H), 3.32 (d,  $J = 12.7$  Hz, 1H), 3.21 (t,  $J = 8.0$  Hz, 1H), 2.92 – 2.80 (m, 2H), 2.36 (s, 6H), 2.32 – 2.14 (m, 2H), 1.85 – 1.65 (m, 3H), 1.22 (m, 12H), 1.10 (d,  $J = 6.9$  Hz, 6H).  $^{13}\text{C}$  NMR (150 MHz,  $\text{CDCl}_3$ )  $\delta$  148.16, 146.87, 143.96, 137.41, 130.42, 128.60, 125.91, 120.60, 70.78, 52.80, 49.21, 34.85, 34.03, 28.57, 25.20, 23.95, 23.56, 22.84, 21.33.

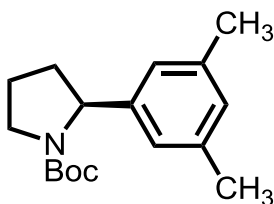

***t*-butyl (S)-2-(3,5-dimethylphenyl)pyrrolidine-1-carboxylate (8)**

The title compound was obtained by following the method used to synthesize compound **6**. The BOC protected product **8** was obtained as a yellow oil in 59 % yield (2 steps). The er value was determined by HPLC analysis on a Chiralcel IC column (5% isopropanol in hexanes, 0.5 mL/min) with  $t_r = 27.36$  min (minor), 38.87 min (major): 98:2 er.  $^1\text{H}$  NMR (600 MHz,  $\text{CDCl}_3$ ) (2:1 mixture of rotamers, peaks corresponding to minor rotamer starred)  $\delta$  6.83 (s, 1H), 6.76 (s, 2H), 4.87 (brs, 0.33H)\*, 4.69 (s, 0.66H), 3.67-3.43 (m, 2H), 2.36-2.18 (m, 7H), 1.98 – 1.73 (m, 3H), 1.46 (s, 3H)\*, 1.19 (s, 6H).  $^{13}\text{C}$  NMR (150 MHz,  $\text{CDCl}_3$ )  $\delta$  154.66, 154.48\*, 144.99, 144.06\*, 137.66\*, 137.44, 128.27\*, 127.95, 123.37, 123.12\*, 79.05, 61.19, 60.63\*, 47.35\*, 47.01, 35.90, 34.87\*, 28.51\*, 28.13, 23.49\*, 23.22, 21.29.

HPLC data:

Please note: Due to restricted C-N thioamide bond rotation the HPLC spectrum can show four peaks.

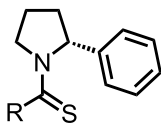

2a

Data File: C:\EZChrom Elite\Enterprise\Projects\Default\Data\Pankaj\89B-0.5%IPA

Method: C:\EZChrom Elite\Enterprise\Projects\Default\Method\untitled.met

Acquired: 3/25/2015 11:06:46 AM

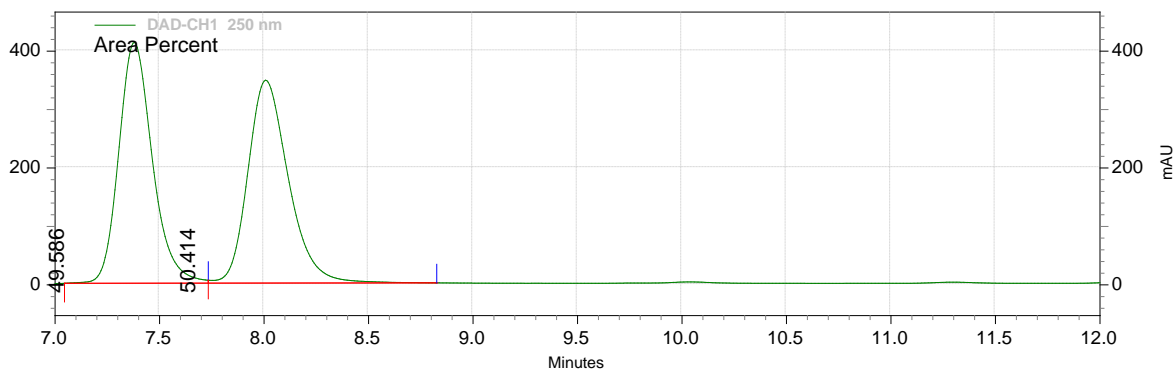

### DAD-CH1 250 nm Results

| Retention Time | Area            | Area %        |
|----------------|-----------------|---------------|
| 7.380          | 18407109        | 49.59         |
| 8.007          | 18714453        | 50.41         |
| <b>Totals</b>  | <b>37121562</b> | <b>100.00</b> |

### Area % Report

Method: C:\EZChrom Elite\Enterprise\Projects\Default\Method\A 30 min without fc 0.5 ml per min.met

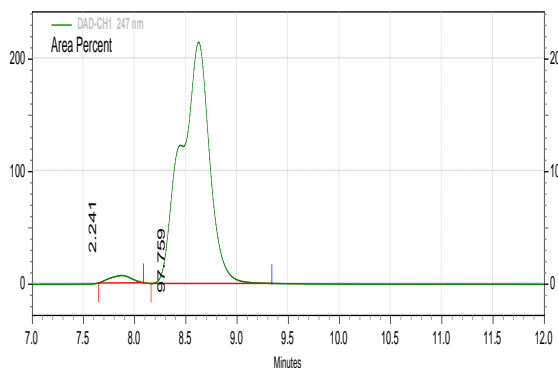

**R-isomer**

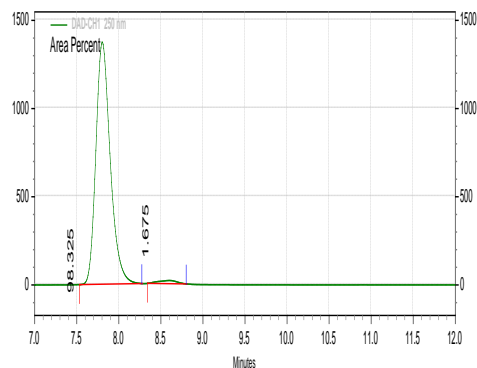

**S-isomer**

| Retention Time | Area            | Area %        | Retention Time | Area            | Area %        |
|----------------|-----------------|---------------|----------------|-----------------|---------------|
| 7.873          | 377549          | 2.24          | 7.800          | 65129513        | 98.33         |
| 8.627          | 16467183        | 97.76         | 8.600          | 1109477         | 1.67          |
| <b>Totals</b>  | <b>16844732</b> | <b>100.00</b> | <b>Totals</b>  | <b>66238990</b> | <b>100.00</b> |

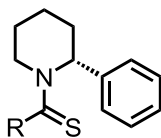

**2b**

Data File: C:\EZChrom Elite\Enterprise\Projects\Default\Data\Pankaj\95Fre-pure-ADH

Method: C:\EZChrom Elite\Enterprise\Projects\Default\Method\untitled.met

Acquired: 6/8/2015 1:40:59 PM

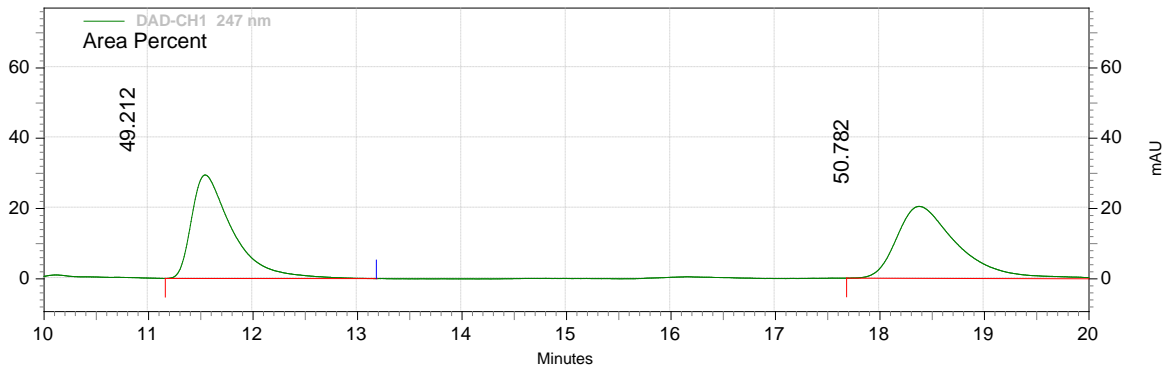

**DAD-CH1 247 nm Results**

| Retention Time | Area           | Area %        |
|----------------|----------------|---------------|
| 11.540         | 3205788        | 49.21         |
| 18.373         | 3308053        | 50.78         |
| <b>Totals</b>  | <b>6514185</b> | <b>100.00</b> |

Data File: C:\EZChrom Elite\Enterprise\Projects\Default\Data\Pankaj\134Dre-ADH  
 Method: C:\EZChrom Elite\Enterprise\Projects\Default\Method\untitled.met  
 Acquired: 6/10/2015 4:00:49 PM  
 Printed: 2/3/2016 11:51:51 AM

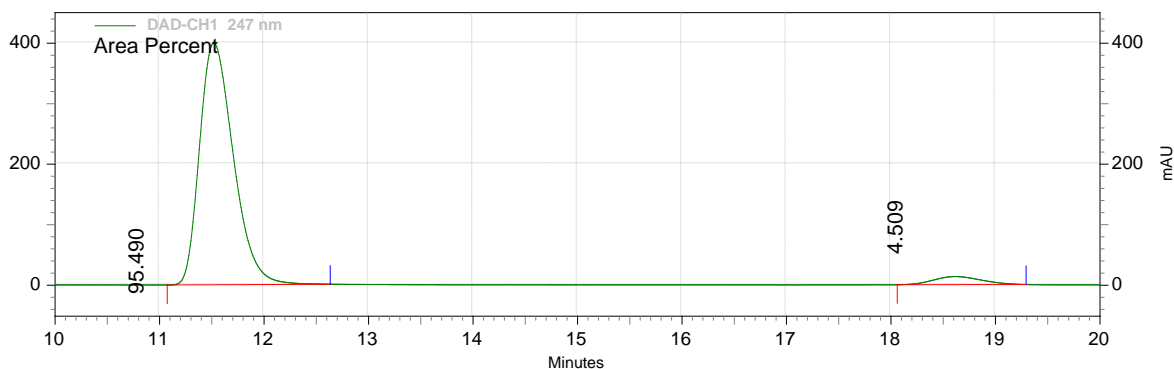

**DAD-CH1 247 nm Results**

| Retention Time | Area            | Area %        |
|----------------|-----------------|---------------|
| 11.520         | 35939602        | 95.49         |
| 18.613         | 1697228         | 4.51          |
| <b>Totals</b>  | <b>37637176</b> | <b>100.00</b> |

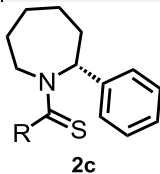

**Area % Report**

Data File: C:\EZChrom Elite\Enterprise\Projects\Default\Data\Pankaj\pritha\pv-05-740-4-5%IPA-0.5ml.min-30min-IC-IC

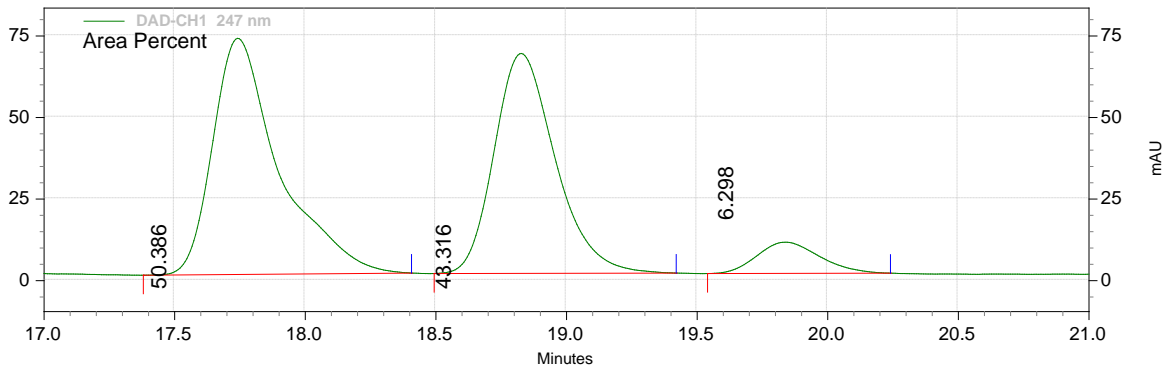

**DAD-CH1 247 nm Results**

| Retention Time | Area     | Area % |
|----------------|----------|--------|
| 17.740         | 5092772  | 50.39  |
| 18.827         | 4378176  | 43.32  |
| 19.840         | 636588   | 6.30   |
| Totals         | 10107536 | 100.00 |

Data File: C:\EZChrom Elite\Enterprise\Projects\Default\Data\Pankaj\pritha\pv-05-709-4-5% IPA-0.5ml.min-30min-IC-IC

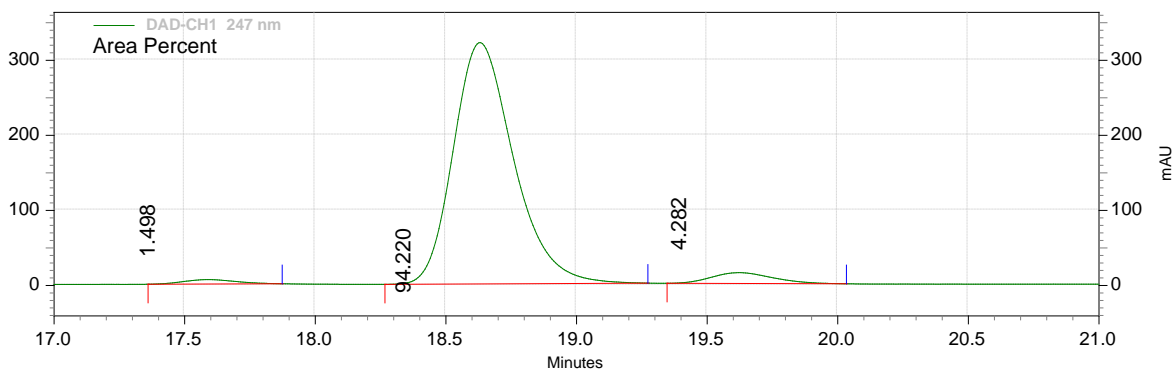

**DAD-CH1 247 nm Results**

| Retention Time | Area     | Area % |
|----------------|----------|--------|
| 17.587         | 327839   | 1.50   |
| 18.633         | 20617508 | 94.22  |
| 19.620         | 936927   | 4.28   |
| Totals         | 21882274 | 100.00 |

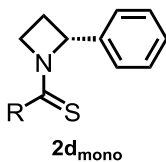

**Area % Report**

Data File: C:\EZChrom Elite\Enterprise\Projects\Default\Data\Pankaj\145C-lower-ODH  
Method: C:\EZChrom Elite\Enterprise\Projects\Default\Method\untitled.met

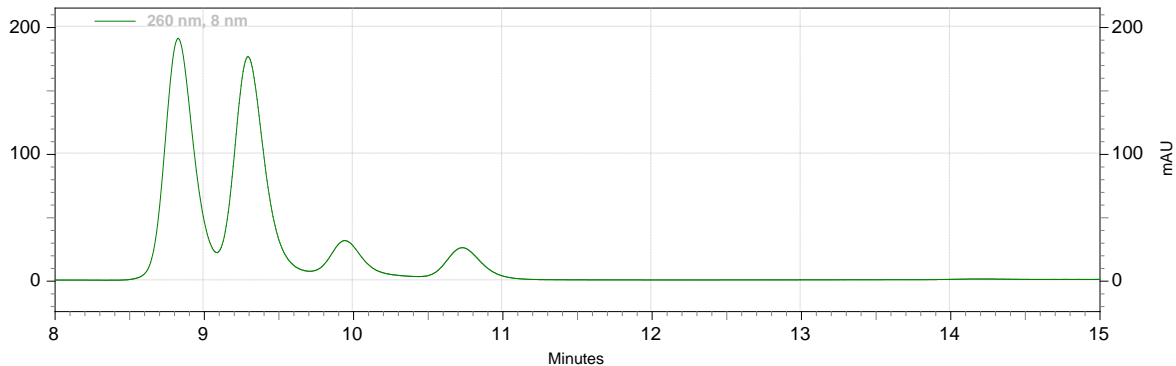

|        |          |       |
|--------|----------|-------|
| 8.827  | 33369517 | 35.97 |
| 9.293  | 32295605 | 34.82 |
| 9.947  | 10161730 | 10.95 |
| 10.727 | 7708026  | 8.31  |

**Area % Report**

Data File: C:\EZChrom Elite\Enterprise\Projects\Default\Data\Pankaj\145Bre-lower ODH

Method: C:\EZChrom Elite\Enterprise\Projects\Default\Method\A 30 min without fc 0.5 ml per min.met

Acquired: 7/1/2015 1:18:03 PM

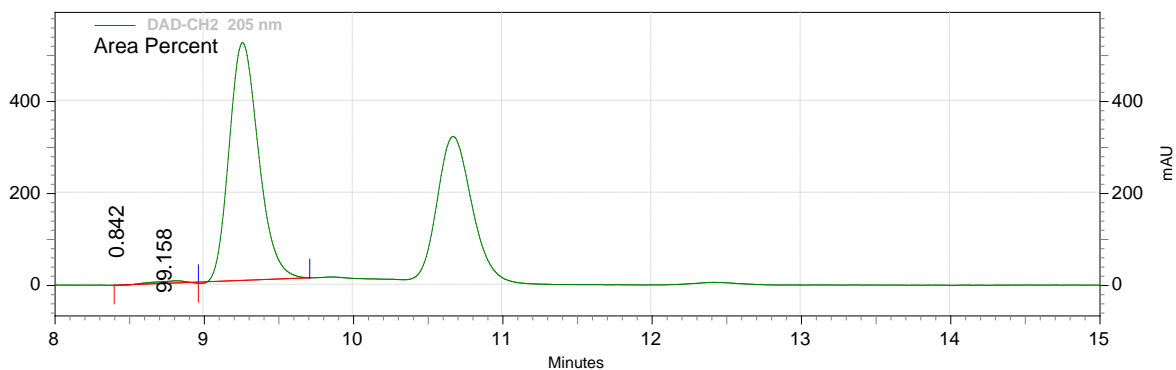

**DAD-CH2 205 nm Results**

| Retention Time | Area     | Area % |
|----------------|----------|--------|
| 8.813          | 239650   | 0.84   |
| 9.253          | 28236062 | 99.16  |
| Totals         | 28475712 | 100.00 |

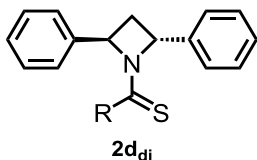

**Area % Report**

Data File: C:\EZChrom Elite\Enterprise\Projects\Default\Data\Pankaj\145C-higher-ODH

Method: C:\EZChrom Elite\Enterprise\Projects\Default\Method\A 45 min without fc 0.5 ml per min.met

Acquired: 7/1/2015 5:09:12 PM

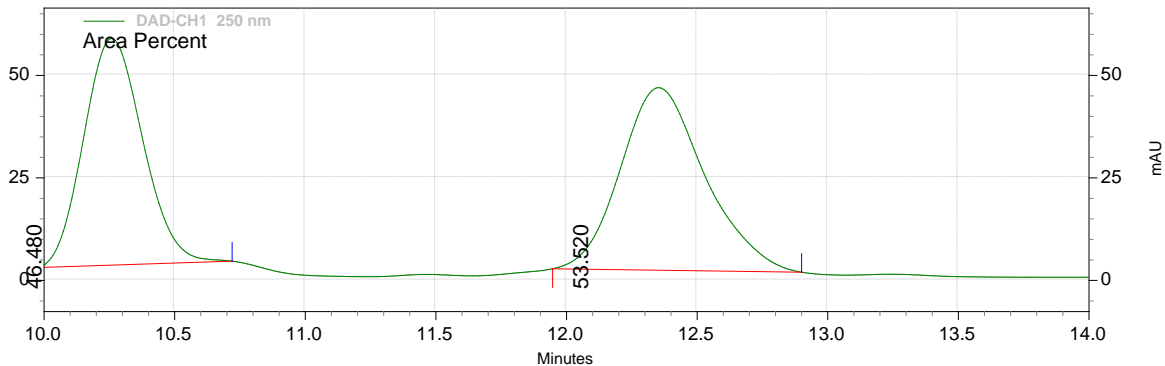

| Retention Time | Area    | Area % |
|----------------|---------|--------|
| 10.260         | 3470420 | 46.48  |
| 12.353         | 3996080 | 53.52  |
| Totals         | 7466500 | 100.00 |

Data File: C:\EZChrom Elite\Enterprise\Projects\Default\Data\Pankaj\145B-higher-ODH  
 Method: C:\EZChrom Elite\Enterprise\Projects\Default\Method\A 45 min without fc 0.5 ml per min.met  
 Acquired: 7/1/2015 5:38:01 PM

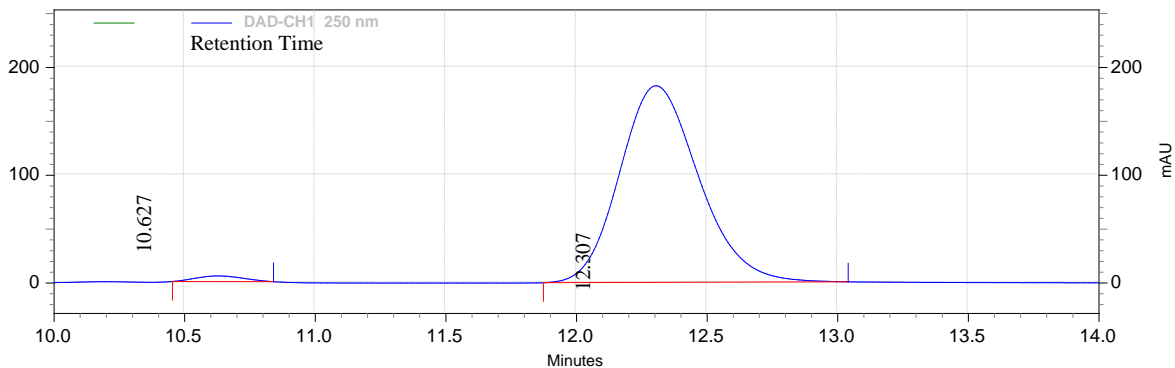

| Retention Time | Area     | Area % | Height | Height % |
|----------------|----------|--------|--------|----------|
| 10.627         | 262966   | 1.68   | 20964  | 2.79     |
| 12.307         | 15361317 | 98.32  | 729785 | 97.21    |
| Totals         | 15624283 | 100.00 | 750749 | 100.00   |

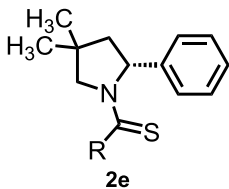

**Area % Report**

Data File: C:\EZChrom Elite\Enterprise\Projects\Default\Data\Pankaj\X-1-48-1re2-IC-IC-1-0.5  
 Method: C:\EZChrom Elite\Enterprise\Projects\Default\Method\untitled.met

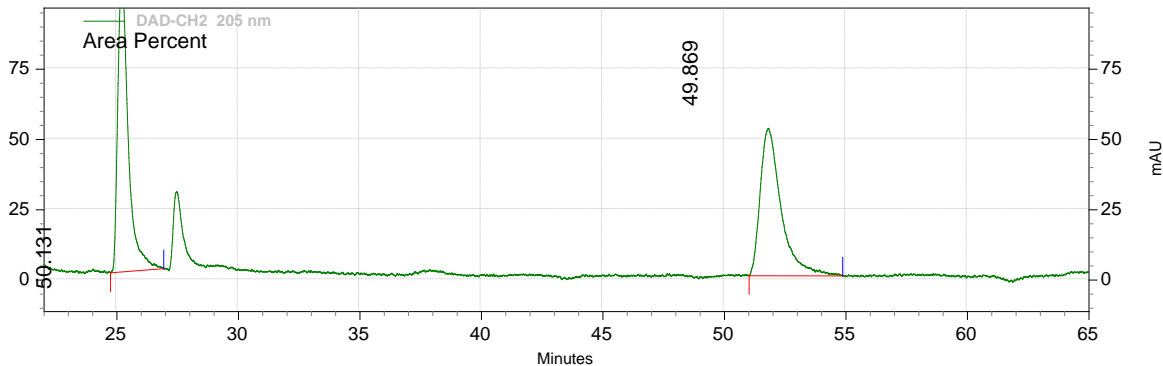

**DAD-CH2 205 nm Results**

| Retention Time | Area            | Area %        |
|----------------|-----------------|---------------|
| 25.200         | 12616586        | 50.13         |
| 51.800         | 12550729        | 49.87         |
| <b>Totals</b>  | <b>25167315</b> | <b>100.00</b> |

Data File: C:\EZChrom Elite\Enterprise\Projects\Default\Data\Pankaj\X-1-48-2-IC-IC-1-0.5  
 Method: C:\EZChrom Elite\Enterprise\Projects\Default\Method\untitled.met  
 Acquired: 12/15/2015 7:49:03 PM  
 Printed: 2/3/2016 3:00:24 PM

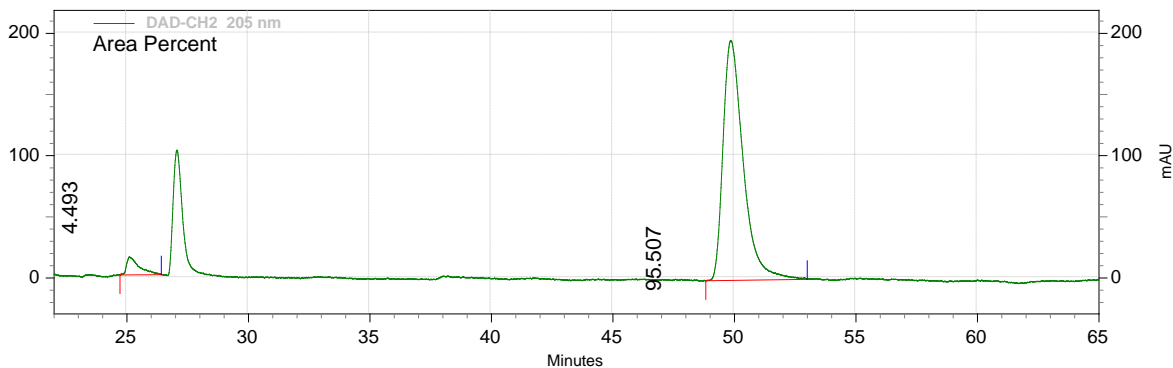

**DAD-CH2 205 nm Results**

| Retention Time | Area            | Area %        |
|----------------|-----------------|---------------|
| 25.100         | 2134294         | 4.49          |
| 49.860         | 45366926        | 95.51         |
| <b>Totals</b>  | <b>47501220</b> | <b>100.00</b> |

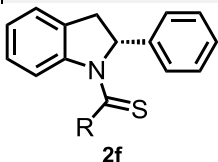

**Area % Report**

Data File: C:\EZChrom Elite\Enterprise\Projects\Default\Data\Pankaj\XG-1-29-2-ODH-IC-1-0.5  
 Method: C:\EZChrom Elite\Enterprise\Projects\Default\Method\A 40 min without fc 0.5 ml per min.met



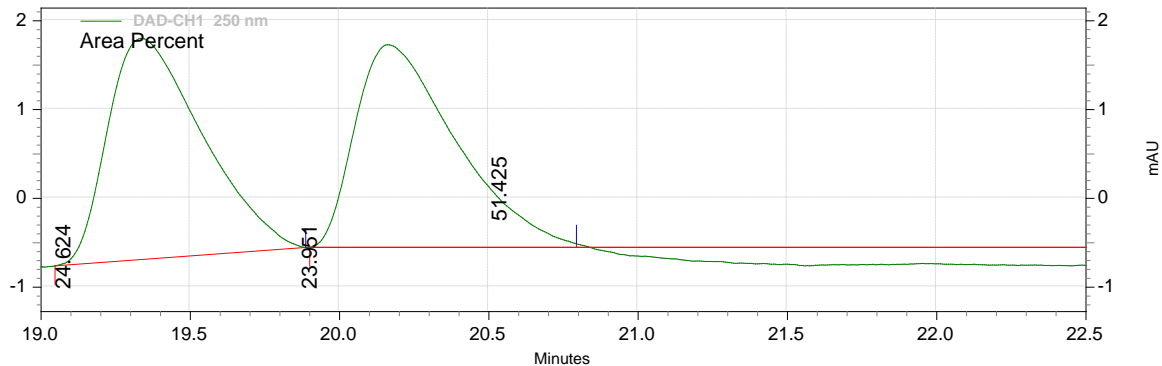

### DAD-CH1 250 nm Results

| Retention Time | Area          | Area %        |
|----------------|---------------|---------------|
| 19.333         | 219287        | 24.62         |
| 20.160         | 213298        | 23.95         |
| 20.793         | 457962        | 51.42         |
| <b>Totals</b>  | <b>890547</b> | <b>100.00</b> |

### Area % Report

Data File: C:\EZChrom Elite\Enterprise\Projects\Default\Data\Pankaj\XG-1-38-ODH-IC-1-0.5

Method: C:\EZChrom Elite\Enterprise\Projects\Default\Method\A 40 min without fc 0.5 ml per min.met

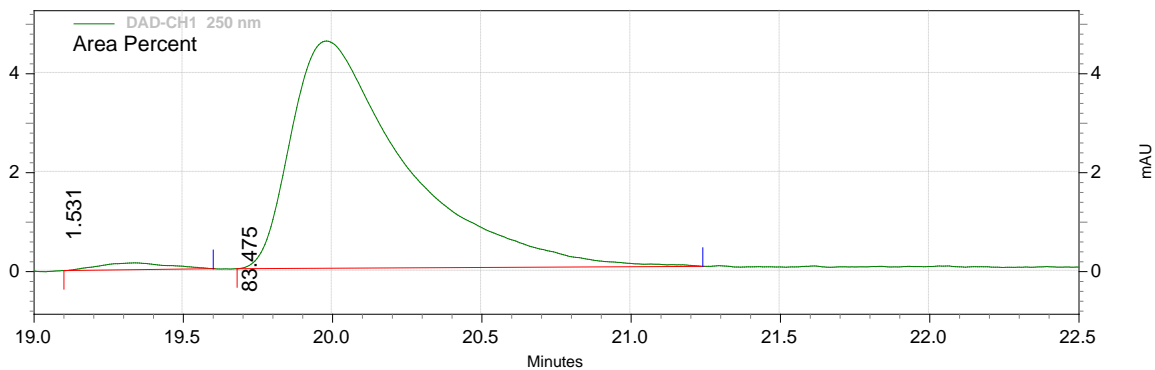

### DAD-CH1 250 nm Results

| Retention Time | Area          | Area %        |
|----------------|---------------|---------------|
| 19.333         | 8968          | 1.53          |
| 19.980         | 489047        | 83.47         |
| <b>Totals</b>  | <b>585862</b> | <b>100.00</b> |

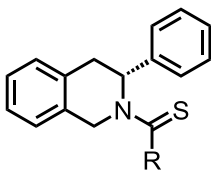

2g

### Area % Report

Data File: C:\EZChrom Elite\Enterprise\Projects\Default\Data\Pankaj\x-1-51-2-IC-IC-1-0.5

Method: C:\EZChrom Elite\Enterprise\Projects\Default\Method\A 60 min without fc 0.5 ml per min.met

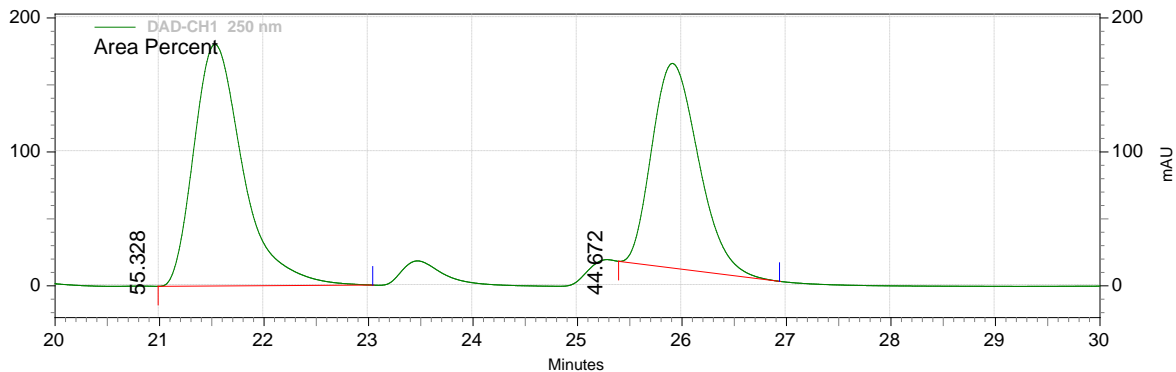

### DAD-CH1 250 nm Results

| Retention Time | Area     | Area % |
|----------------|----------|--------|
| 21.533         | 23542079 | 55.33  |
| 25.907         | 19007697 | 44.67  |
| Totals         | 42549776 | 100.00 |

Data File: C:\EZChrom Elite\Enterprise\Projects\Default\Data\Pankaj\x-1-57-2(1)-IC-IC-1-0.5

Method: C:\EZChrom Elite\Enterprise\Projects\Default\Method\untitled.met

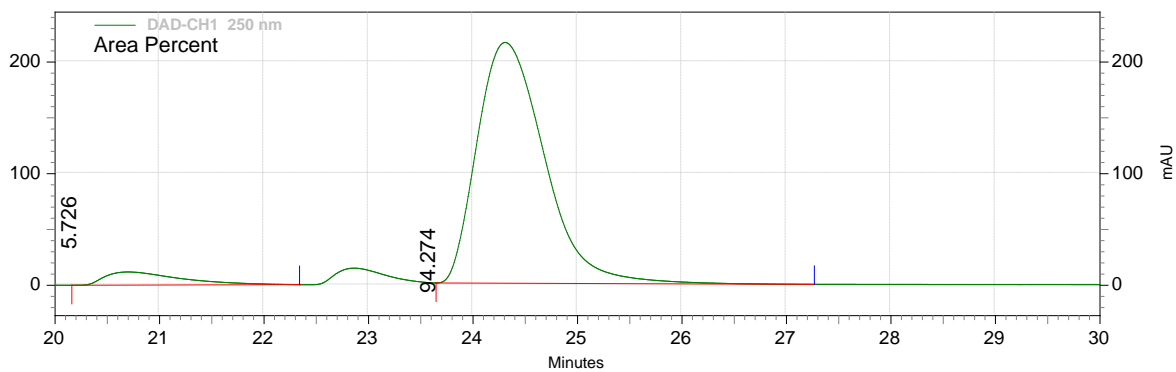

### DAD-CH1 250 nm Results

| Retention Time | Area     | Area % |
|----------------|----------|--------|
| 20.700         | 2344156  | 5.73   |
| 24.307         | 38591343 | 94.27  |
| Totals         | 40935499 | 100.00 |

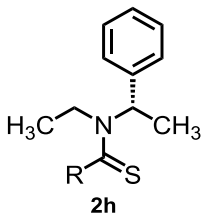

### Area % Report

Data File: C:\EZChrom Elite\Enterprise\Projects\Default\Data\Pankaj\pj3-70Bre-rac-5-0.5-IC-IC

Method: C:\EZChrom Elite\Enterprise\Projects\Default\Method\untitled.met

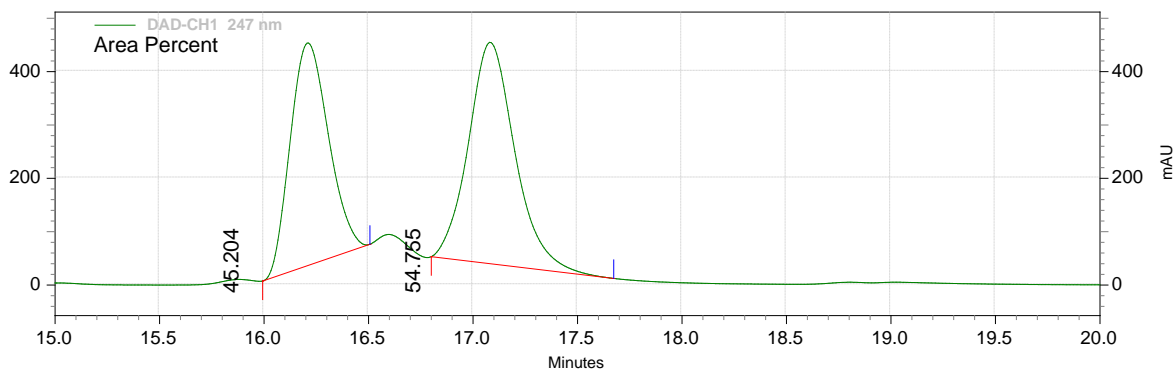

**DAD-CH2 205 nm Results**

| Retention Time | Area            | Area %        |
|----------------|-----------------|---------------|
| 16.213         | 30654718        | 44.43         |
| 17.080         | 38345249        | 55.57         |
| <b>Totals</b>  | <b>68999967</b> | <b>100.00</b> |

**Area % Report**

Data File: C:\EZChrom Elite\Enterprise\Projects\Default\Data\Pankaj\pj3-76C-chiral-5-0.5-IC-IC  
 Method: C:\EZChrom Elite\Enterprise\Projects\Default\Method\untitled.met

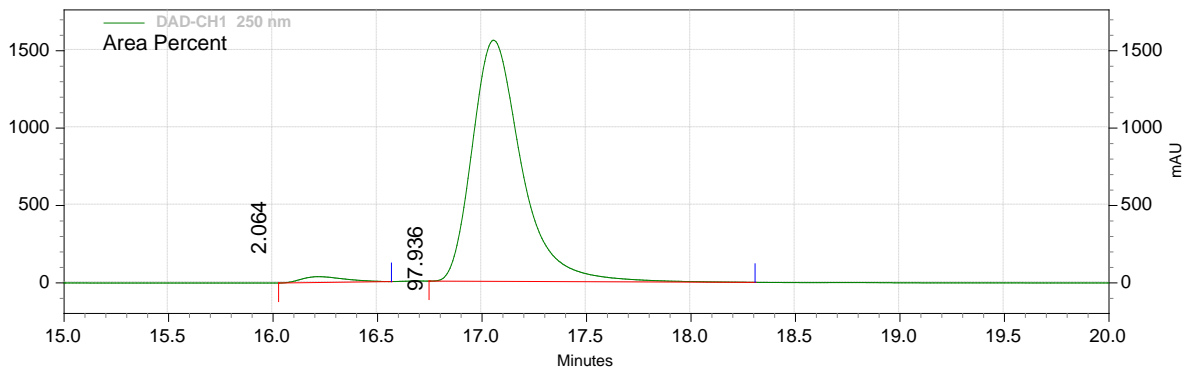

| Retention Time | Area             | Area %        |
|----------------|------------------|---------------|
| 16.220         | 2152338          | 2.06          |
| 17.053         | 102137556        | 97.94         |
| <b>Totals</b>  | <b>104289894</b> | <b>100.00</b> |

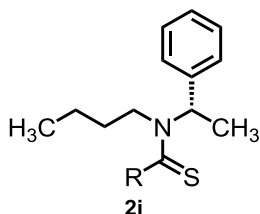

**Area % Report**

Data File: C:\EZChrom Elite\Enterprise\Projects\Default\Data\Pankaj\pj3-81A-IC-IC-2-0.5  
 Method: C:\EZChrom Elite\Enterprise\Projects\Default\Method\untitled.met

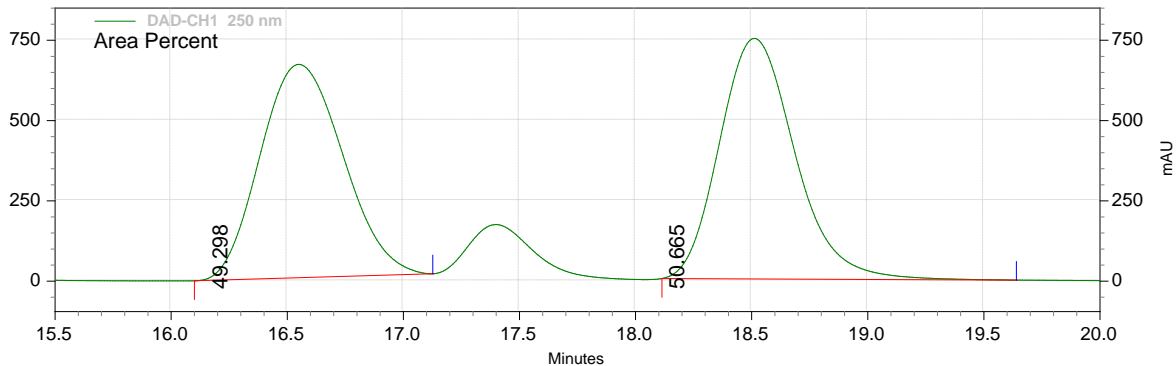

### DAD-CH2 205 nm Results

| Retention Time | Area      | Area % |
|----------------|-----------|--------|
| 16.553         | 94715396  | 49.30  |
| 18.513         | 97422812  | 50.70  |
| Totals         | 192138208 | 100.00 |

Data File: C:\EZChrom Elite\Enterprise\Projects\Default\Data\Pankaj\pj3-81B-IC-IC-2-0.5

Method: C:\EZChrom Elite\Enterprise\Projects\Default\Method\untitled.met

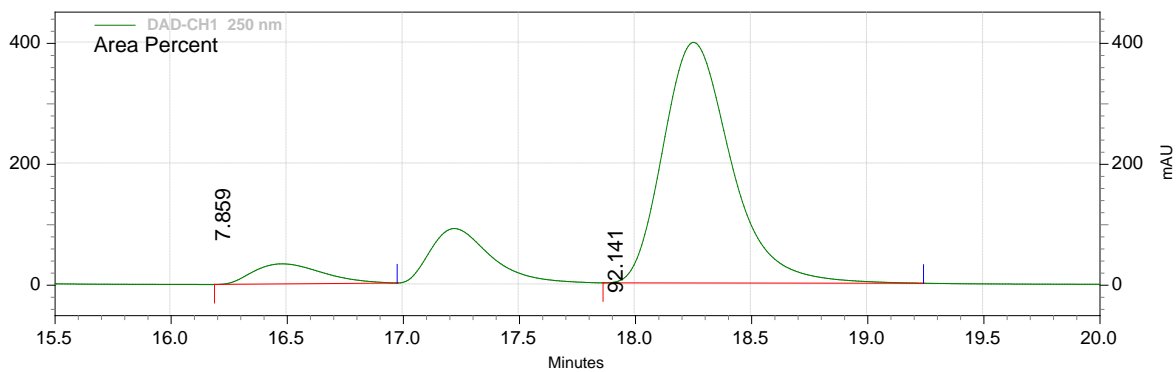

| Retention Time | Area     | Area % |
|----------------|----------|--------|
| 16.480         | 2763811  | 7.86   |
| 18.247         | 32403059 | 92.14  |
| Totals         | 35166870 | 100.00 |

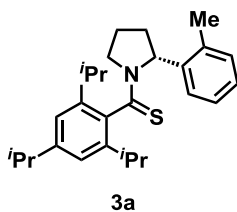

Data File: C:\EZChrom Elite\Enterprise\Projects\Default\Data\Pankaj\pritha\pv-04-673-rac-670-3-1%IPA-0.5ml.min-75min-IC-IC

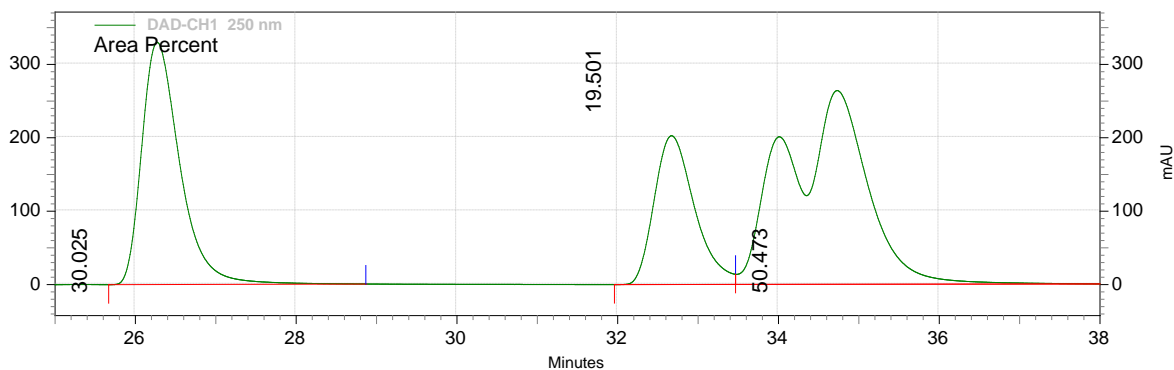

#### DAD-CH1 250 nm Results

| Retention Time | Area             | Area %        |
|----------------|------------------|---------------|
| 26.273         | 43479896         | 30.03         |
| 32.667         | 28240403         | 19.50         |
| 34.733         | 73091564         | 50.47         |
| <b>Totals</b>  | <b>144811863</b> | <b>100.00</b> |

#### Area % Report

Data File: C:\EZChrom Elite\Enterprise\Projects\Default\Data\Pankaj\pritha\pv-04-673-3-1% IPA-0.5ml.min-75min-IC-IC

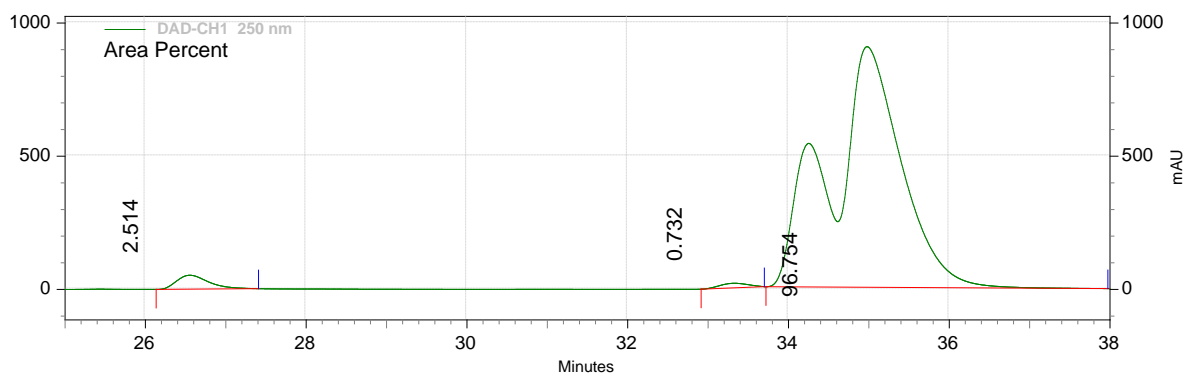

#### DAD-CH1 250 nm Results

| Retention Time | Area             | Area %        |
|----------------|------------------|---------------|
| 26.553         | 5783370          | 2.51          |
| 33.327         | 1683241          | 0.73          |
| 34.980         | 222536525        | 96.75         |
| <b>Totals</b>  | <b>230003136</b> | <b>100.00</b> |

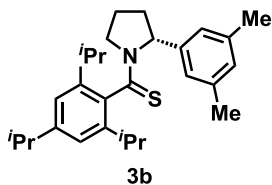

#### Area % Report

Data File: C:\EZChrom Elite\Enterprise\Projects\Default\Data\Pankaj\pritha\pv-04-671-1-1% IPA-0.5ml.min-90min-IC-IC

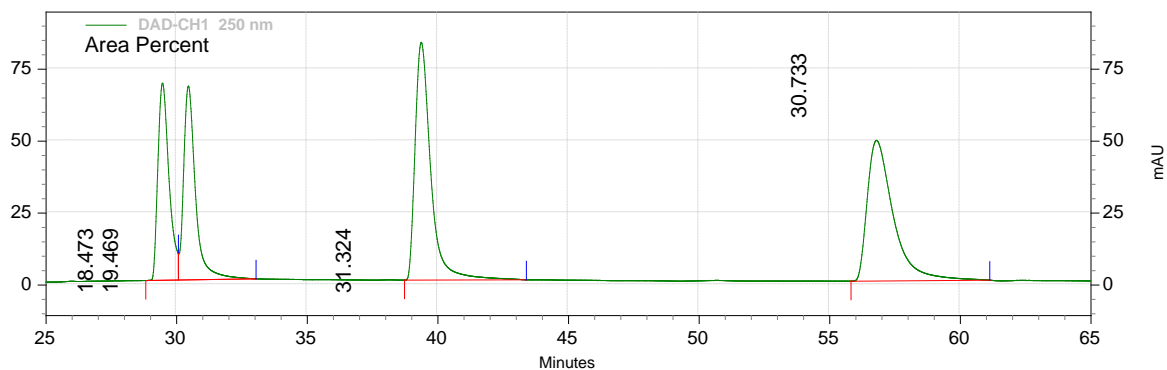

### DAD-CH1 250 nm Results

| Retention Time | Area            | Area %        |
|----------------|-----------------|---------------|
| 29.460         | 8122943         | 18.47         |
| 30.447         | 8561302         | 19.47         |
| 39.367         | 13774311        | 31.32         |
| 56.793         | 13514423        | 30.73         |
| <b>Totals</b>  | <b>43972979</b> | <b>100.00</b> |

Data File: C:\EZChrom Elite\Enterprise\Projects\Default\Data\Pankaj\pritha\pv-04-676-1-1%IPA-0.5ml.min-90min-IC-IC

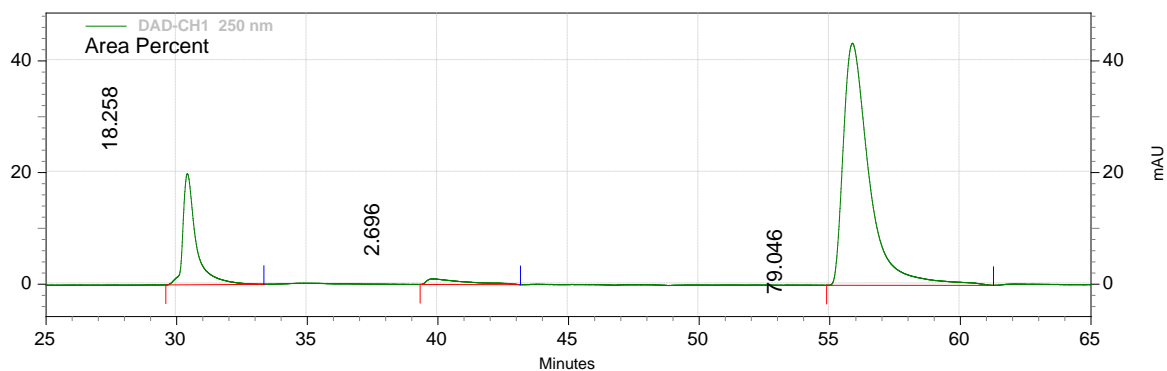

### DAD-CH1 250 nm Results

| Retention Time | Area            | Area %        |
|----------------|-----------------|---------------|
| 30.413         | 2768633         | 18.26         |
| 39.767         | 408841          | 2.70          |
| 55.867         | 11986692        | 79.05         |
| <b>Totals</b>  | <b>15164166</b> | <b>100.00</b> |

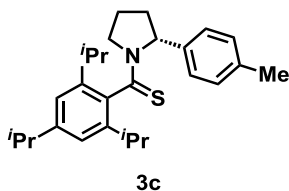

### Area % Report

Data File: C:\EZChrom Elite\Enterprise\Projects\Default\Data\Pankaj\pritha\pv-04-672-rac-569-1-1%IPA-0.5ml.min-60min-IC-IC

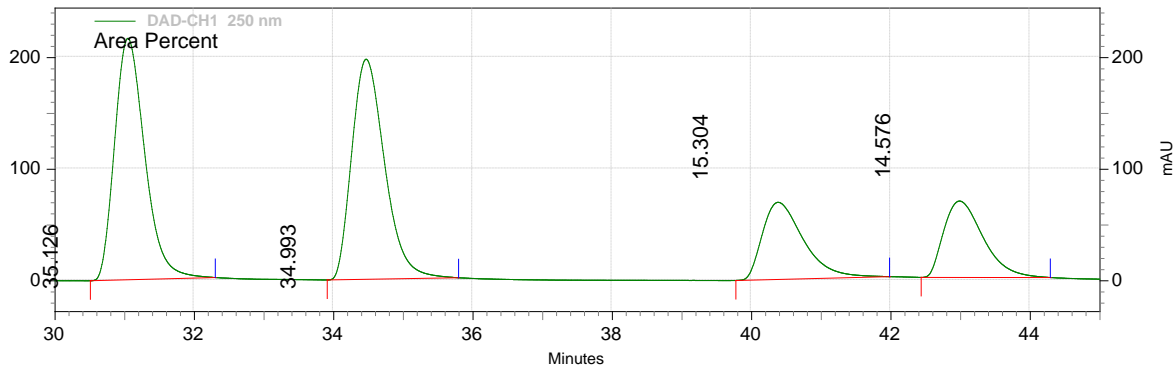

**DAD-CH1 250 nm Results**

| Retention Time | Area            | Area %        |
|----------------|-----------------|---------------|
| 31.047         | 25984462        | 35.13         |
| 34.467         | 25886243        | 34.99         |
| 40.380         | 11321337        | 15.30         |
| 42.987         | 10782455        | 14.58         |
| <b>Totals</b>  | <b>73974497</b> | <b>100.00</b> |

Data File: C:\EZChrom Elite\Enterprise\Projects\Default\Data\Pankaj\pritha\pv-04-672-1-1%IPA-0.5ml.min-60min-IC-IC

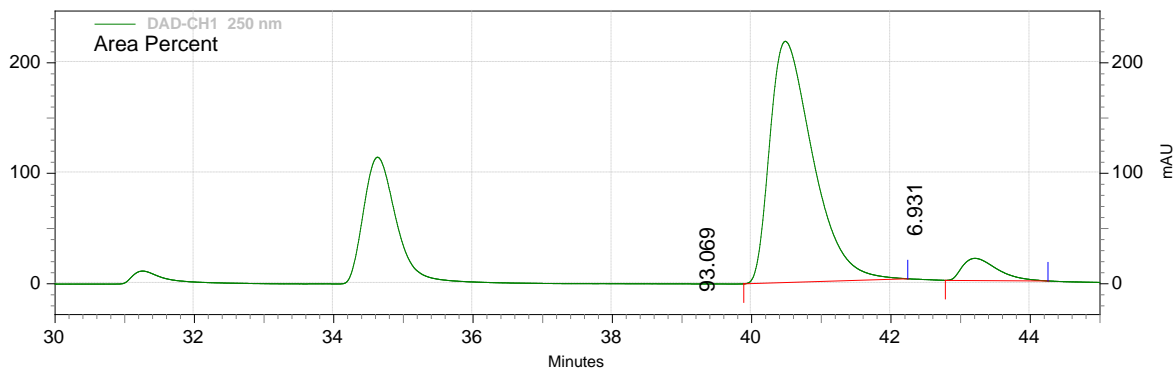

**DAD-CH1 250 nm Results**

| Retention Time | Area            | Area %        |
|----------------|-----------------|---------------|
| 40.487         | 37552590        | 93.07         |
| 43.207         | 2796590         | 6.93          |
| <b>Totals</b>  | <b>40349180</b> | <b>100.00</b> |

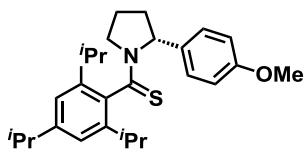

3d

**Area % Report**

Data File: C:\EZChrom Elite\Enterprise\Projects\Default\Data\Pankaj\pritha\pv-04-581-rac-570-3-1%IPA-0.5ml.min-90min-IC-IC

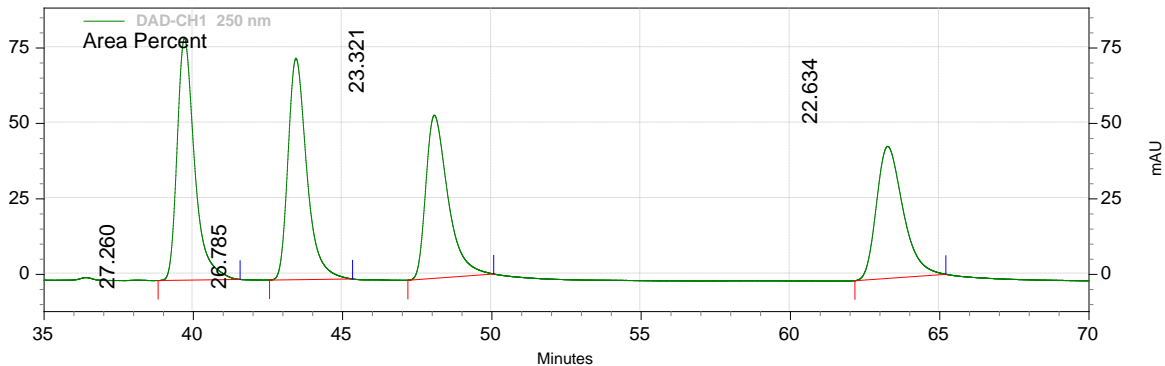

**DAD-CH1 250 nm Results**

| Retention Time | Area     | Area % |
|----------------|----------|--------|
| 39.700         | 13040534 | 27.26  |
| 43.440         | 12813209 | 26.79  |
| 48.073         | 11155982 | 23.32  |
| 63.260         | 10827253 | 22.63  |
| Totals         | 47836978 | 100.00 |

Data File: C:\EZChrom Elite\Enterprise\Projects\Default\Data\Pankaj\pritha\pv-04-581-3-1%IPA-0.5ml.min-90min-IC-IC

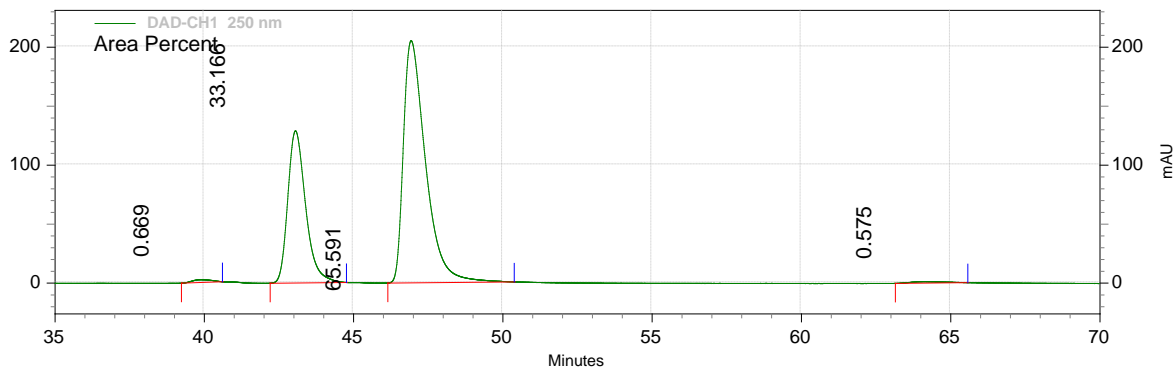

| Retention Time | Area     | Area % |
|----------------|----------|--------|
| 39.900         | 431654   | 0.67   |
| 43.053         | 21411535 | 33.17  |
| 46.927         | 42345338 | 65.59  |
| 64.080         | v371071  | 0.57   |
| Totals         | 64559598 | 100.00 |

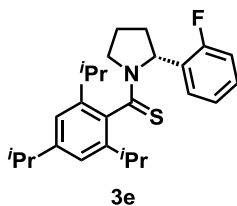

**Area % Report**

Data File: C:\EZChrom Elite\Enterprise\Projects\Default\Data\Pankaj\pritha\pv-04-660-rac-656-0.5%IPA-0.5ml.min-75min-ADH-IC



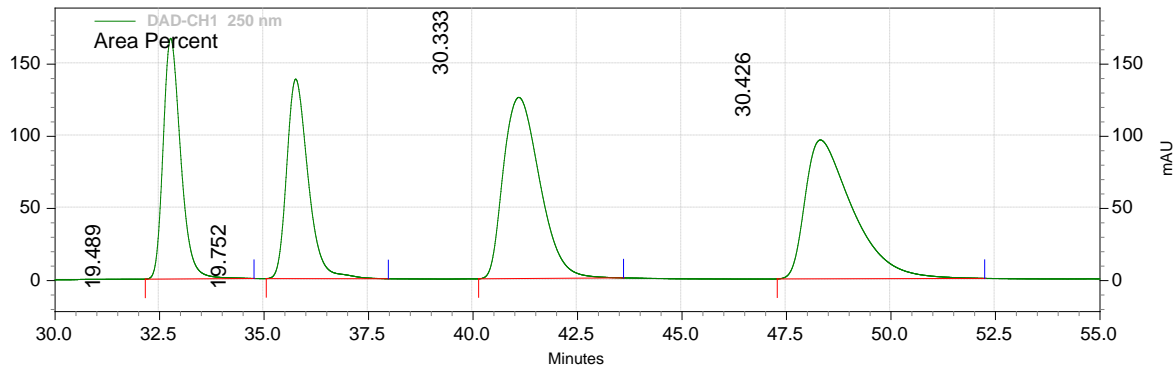

**DAD-CH1 250 nm Results**

| Retention Time | Area            | Area %        |
|----------------|-----------------|---------------|
| 32.767         | 19470143        | 19.49         |
| 35.760         | 19732825        | 19.75         |
| 41.100         | 30304428        | 30.33         |
| 48.313         | 30396973        | 30.43         |
| <b>Totals</b>  | <b>99904369</b> | <b>100.00</b> |

Data File: C:\EZChrom Elite\Enterprise\Projects\Default\Data\Pankaj\pritha\pv-04-660-1-0.5%IPA-0.5ml.min-75min-ADH-IC

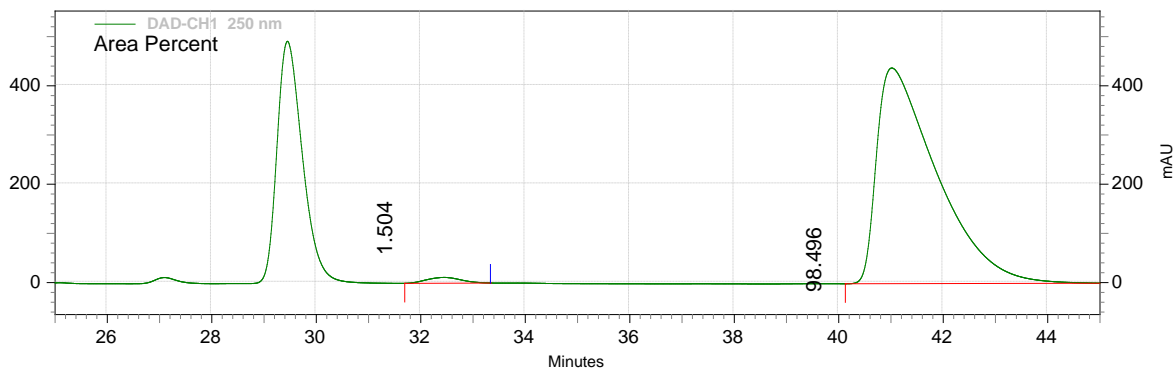

**DAD-CH1 250 nm Results**

| Retention Time | Area             | Area %        |
|----------------|------------------|---------------|
| 32.453         | 2138274          | 1.50          |
| 41.020         | 140064803        | 98.50         |
| <b>Totals</b>  | <b>142203077</b> | <b>100.00</b> |

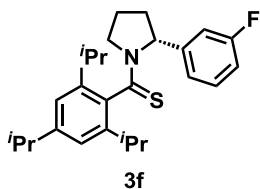

**Area % Report**

Data File: C:\EZChrom Elite\Enterprise\Projects\Default\Data\Pankaj\pritha\pv-04-661-1-rac-572-n-0.5%IPA-0.5ml.min-120min-ADH-IC

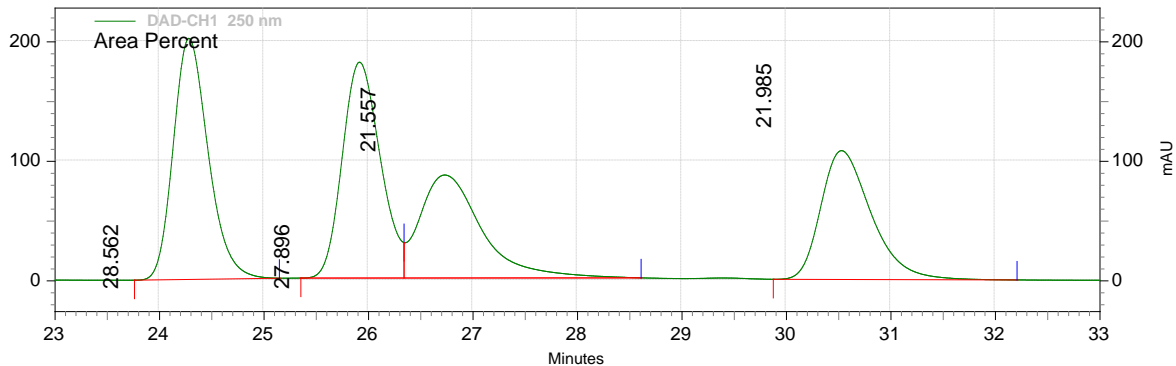

**DAD-CH1 250 nm Results**

| Retention Time | Area            | Area %        |
|----------------|-----------------|---------------|
| 24.280         | 18746537        | 28.56         |
| 25.913         | 18309077        | 27.90         |
| 26.733         | 14148859        | 21.56         |
| 30.527         | 14429503        | 21.98         |
| <b>Totals</b>  | <b>65633976</b> | <b>100.00</b> |

Data File: C:\EZChrom Elite\Enterprise\Projects\Default\Data\Pankaj\pritha\pv-04-661-1-0.5%IPA-0.5ml.min-120min-ADH-IC

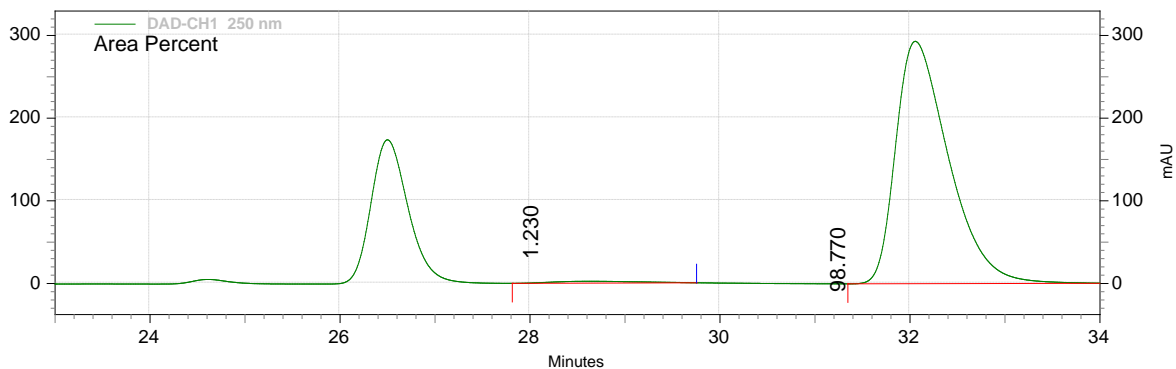

**DAD-CH1 250 nm Results**

| Retention Time | Area            | Area %        |
|----------------|-----------------|---------------|
| 28.640         | 564453          | 1.23          |
| 32.053         | 45321782        | 98.77         |
| <b>Totals</b>  | <b>45886235</b> | <b>100.00</b> |

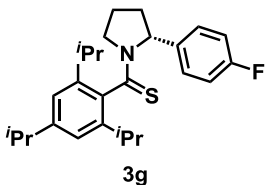

**Area % Report**

Data File: C:\EZChrom Elite\Enterprise\Projects\Default\Data\Pankaj\pritha\pv-04-662-1-rac-655-0.5%IPA-0.5ml.min-120min-ADH-IC

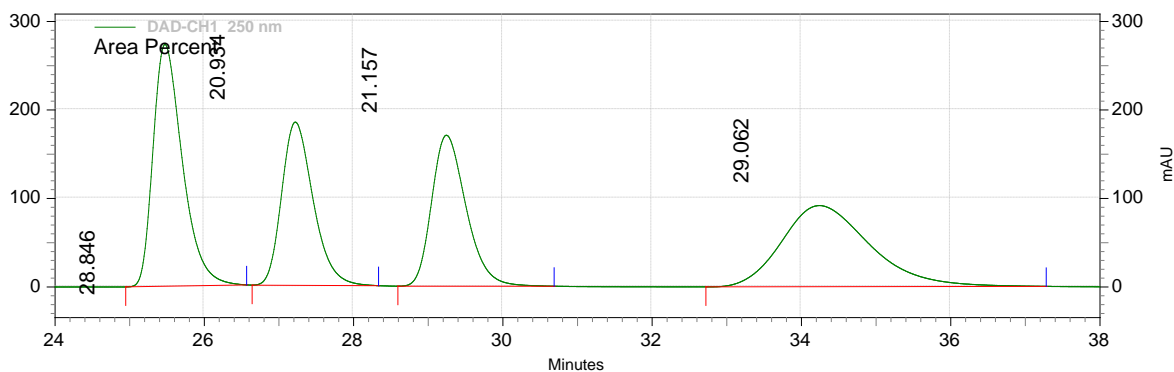

**DAD-CH1 250 nm Results**

| Retention Time | Area             | Area %        |
|----------------|------------------|---------------|
| 25.473         | 29826477         | 28.85         |
| 27.220         | 21645613         | 20.93         |
| 29.247         | 21876573         | 21.16         |
| 34.240         | 30050324         | 29.06         |
| <b>Totals</b>  | <b>103398987</b> | <b>100.00</b> |

Data File: C:\EZChrom Elite\Enterprise\Projects\Default\Data\Pankaj\pritha\pv-04-662-1-0.5%IPA-0.5ml.min-120min-ADH-IC

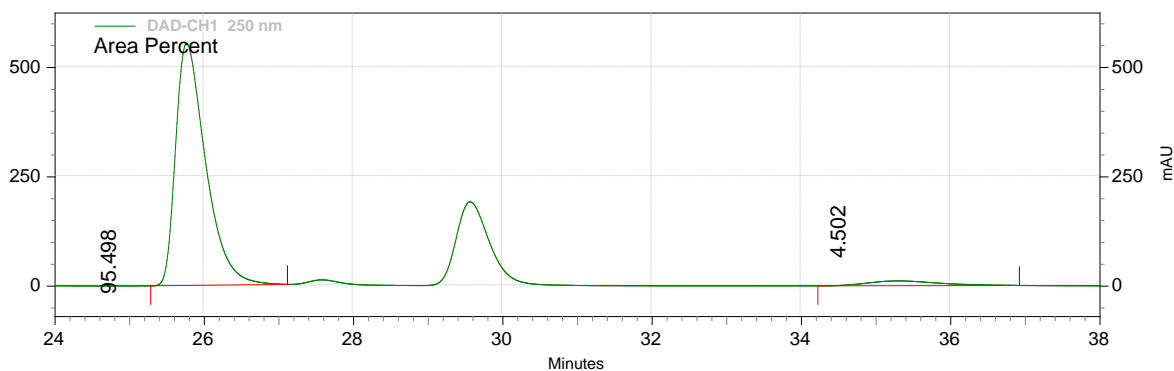

**DAD-CH1 250 nm Results**

| Retention Time | Area            | Area %        |
|----------------|-----------------|---------------|
| 25.760         | 61874506        | 95.50         |
| 35.293         | 2917242         | 4.50          |
| <b>Totals</b>  | <b>64791748</b> | <b>100.00</b> |

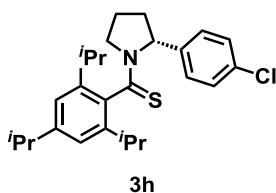

**Area % Report**

Data File: C:\EZChrom Elite\Enterprise\Projects\Default\Data\Pankaj\pritha\pv-04-609-571-rac-1-0.5%IPA-0.5ml.min-120min-ADH-IC

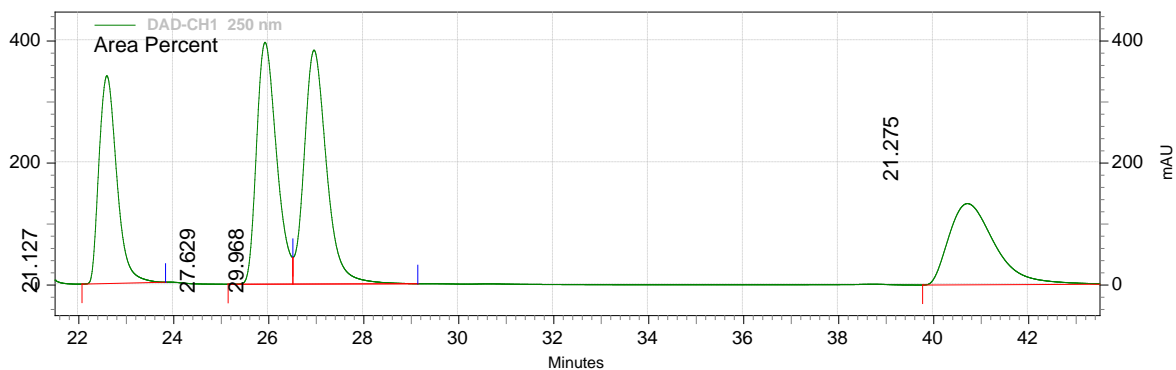

**DAD-CH1 250 nm Results**

| Retention Time | Area             | Area %        |
|----------------|------------------|---------------|
| 22.593         | 35479071         | 21.13         |
| 25.920         | 46397797         | 27.63         |
| 26.953         | 50325587         | 29.97         |
| 40.713         | 35727575         | 21.28         |
| <b>Totals</b>  | <b>167930030</b> | <b>100.00</b> |

Data File: C:\EZChrom Elite\Enterprise\Projects\Default\Data\Pankaj\pritha\pv-04-609-1-0.5%IPA-0.5ml.min-120min-ADH-IC

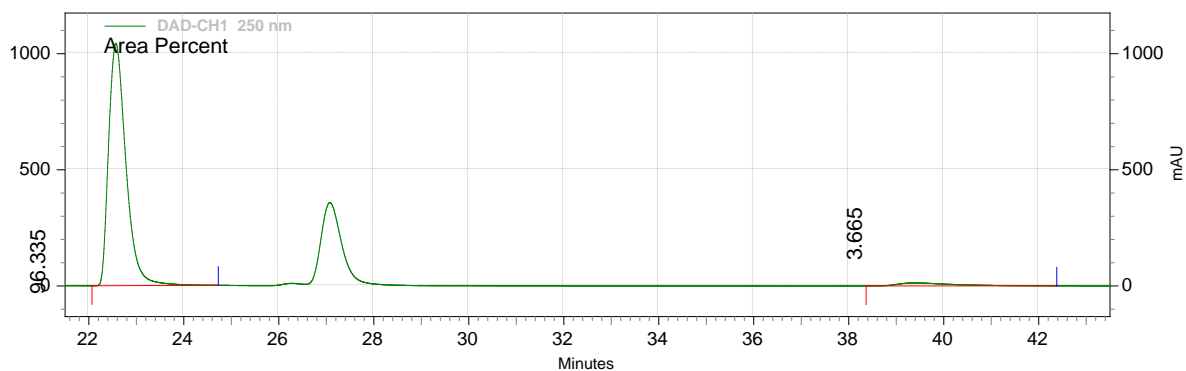

**DAD-CH1 250 nm Results**

| Retention Time | Area             | Area %        |
|----------------|------------------|---------------|
| 22.573         | 105762029        | 96.33         |
| 39.387         | 4023694          | 3.67          |
| <b>Totals</b>  | <b>109785723</b> | <b>100.00</b> |

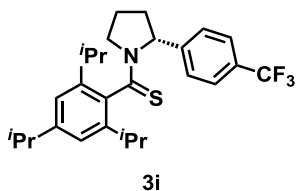

**Area % Report**

Data File: C:\EZChrom Elite\Enterprise\Projects\Default\Data\Pankaj\pritha\pv-04-645-2-rac-448-0.5%IPA-0.5ml.min-120min-ADH-IC

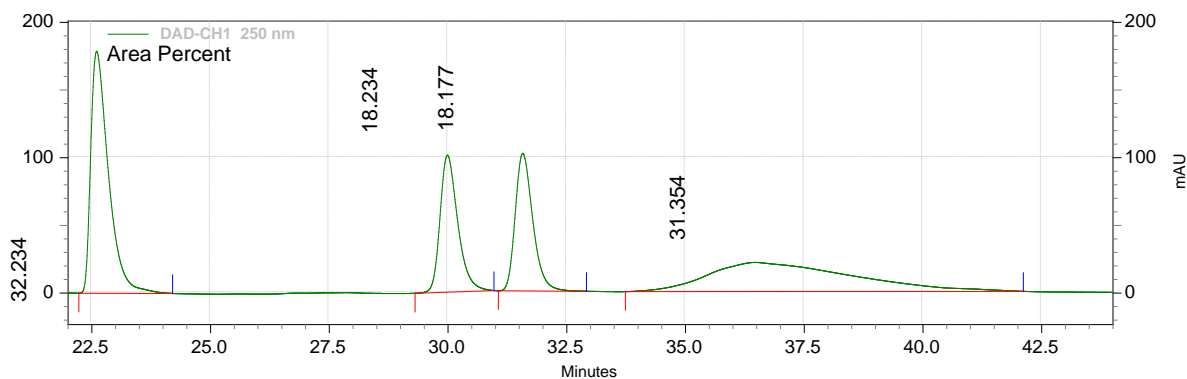

### DAD-CH1 250 nm Results

| Retention Time | Area            | Area %        |
|----------------|-----------------|---------------|
| 22.600         | 18566076        | 32.23         |
| 29.987         | 10502587        | 18.23         |
| 31.573         | 10469571        | 18.18         |
| 36.467         | 18059364        | 31.35         |
| <b>Totals</b>  | <b>57597598</b> | <b>100.00</b> |

Data File: C:\EZChrom Elite\Enterprise\Projects\Default\Data\Pankaj\pritha\pv-04-645-2-0.5% IPA-0.5ml.min-120min-ADH-IC

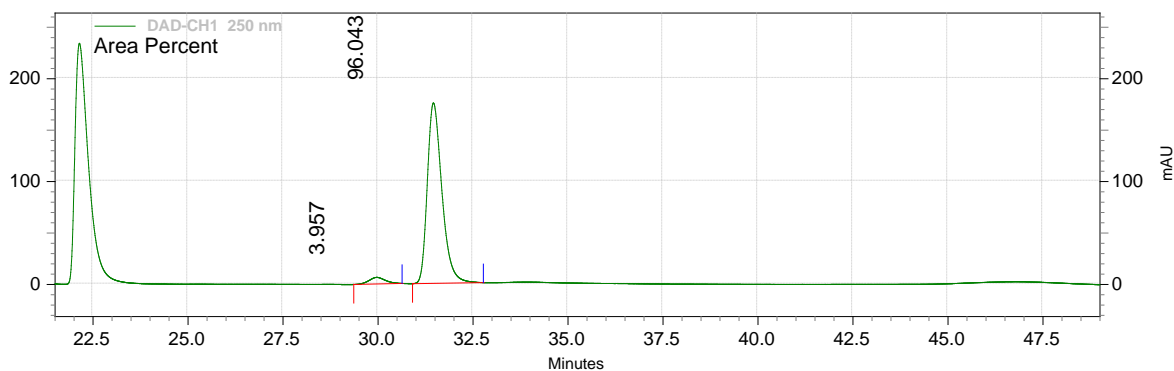

### DAD-CH1 250 nm Results

| Retention Time | Area            | Area %        |
|----------------|-----------------|---------------|
| 29.967         | 770805          | 3.96          |
| 31.460         | 18709828        | 96.04         |
| <b>Totals</b>  | <b>19480633</b> | <b>100.00</b> |

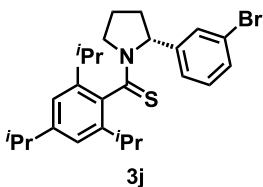

### Area % Report

Data File: C:\EZChrom Elite\Enterprise\Projects\Default\Data\Pankaj\pritha\pv-04-610-1-5% IPA-0.5ml.min-40min-IC-IC

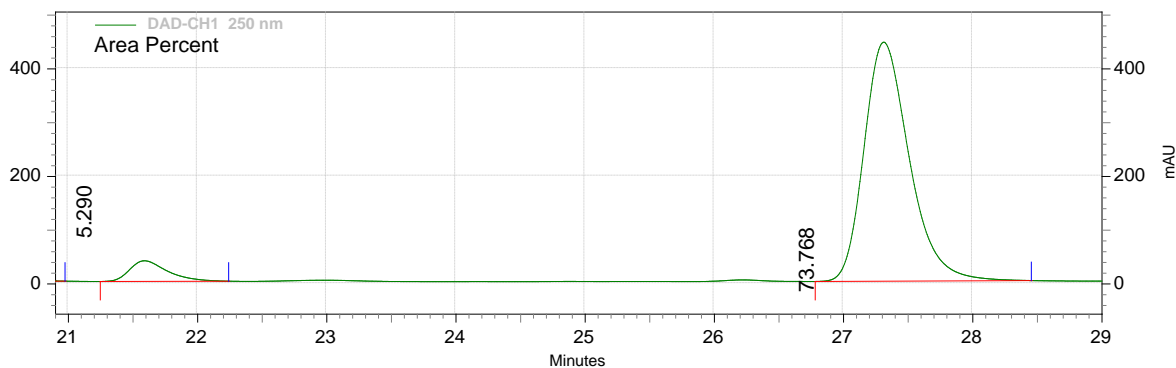

**DAD-CH1 250 nm Results**

| Retention Time | Area            | Area %        |
|----------------|-----------------|---------------|
| 21.587         | 3101923         | 5.29          |
| 27.313         | 43256034        | 73.77         |
| <b>Totals</b>  | <b>58637811</b> | <b>100.00</b> |

Data File: C:\EZChrom Elite\Enterprise\Projects\Default\Data\Pankaj\pritha\pv-04-591-1-5%IPA-0.5ml.min-150min-IC

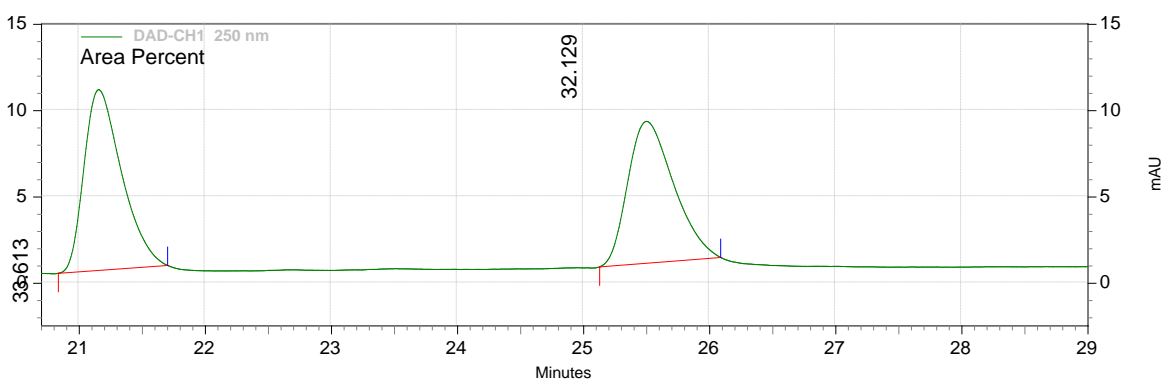

**DAD-CH1 250 nm Results**

| Retention Time | Area           | Area %        |
|----------------|----------------|---------------|
| 21.153         | 868721         | 33.61         |
| 25.500         | 830376         | 32.13         |
| <b>Totals</b>  | <b>2584511</b> | <b>100.00</b> |

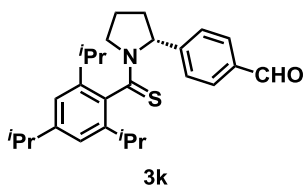

**Area % Report**

Data File: C:\EZChrom Elite\Enterprise\Projects\Default\Data\Pankaj\pritha\pv-04-612-1-5%IPA-0.5ml.min-120min-IC

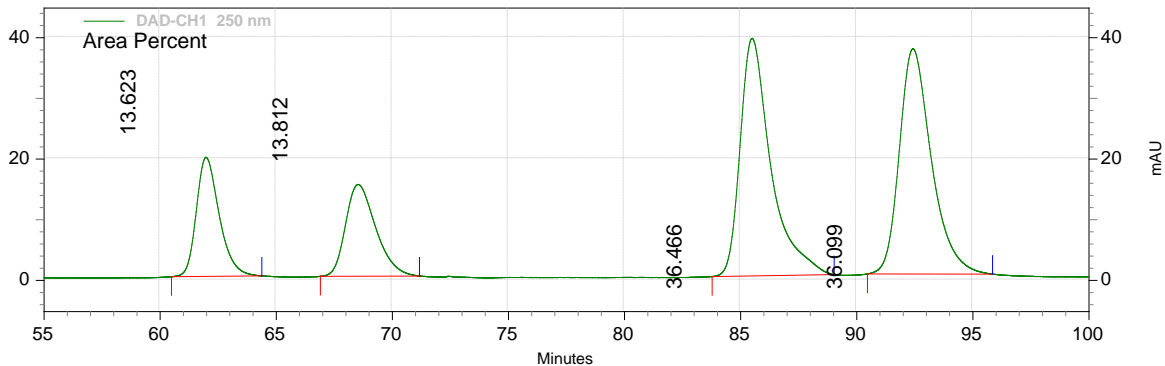

**DAD-CH1 250 nm Results**

| Retention Time | Area            | Area %        |
|----------------|-----------------|---------------|
| 61.973         | 5382274         | 13.62         |
| 68.527         | 5456785         | 13.81         |
| 85.493         | 14406892        | 36.47         |
| 92.420         | 14262209        | 36.10         |
| <b>Totals</b>  | <b>39508160</b> | <b>100.00</b> |

Data File: C:\EZChrom Elite\Enterprise\Projects\Default\Data\Pankaj\pritha\pv-04-621-1-5% IPA-0.5ml.min-120min-IC

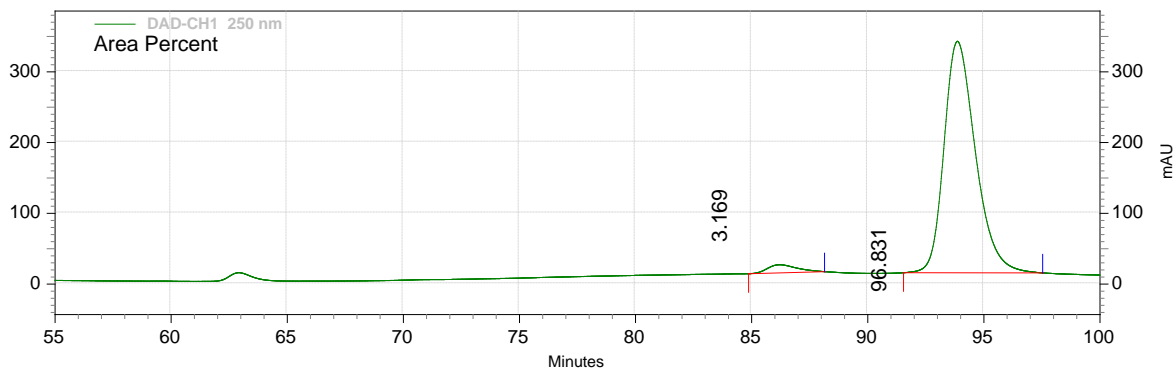

**DAD-CH1 250 nm Results**

| Retention Time | Area             | Area %        |
|----------------|------------------|---------------|
| 86.207         | 4023522          | 3.17          |
| 93.860         | 122959007        | 96.83         |
| <b>Totals</b>  | <b>126982529</b> | <b>100.00</b> |

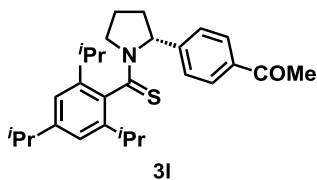

**Area % Report**

Data File: C:\EZChrom Elite\Enterprise\Projects\Default\Data\Pankaj\pritha\pv-04-646-4-rac-590-5% IPA-0.5ml.min-150min-ADH-IC

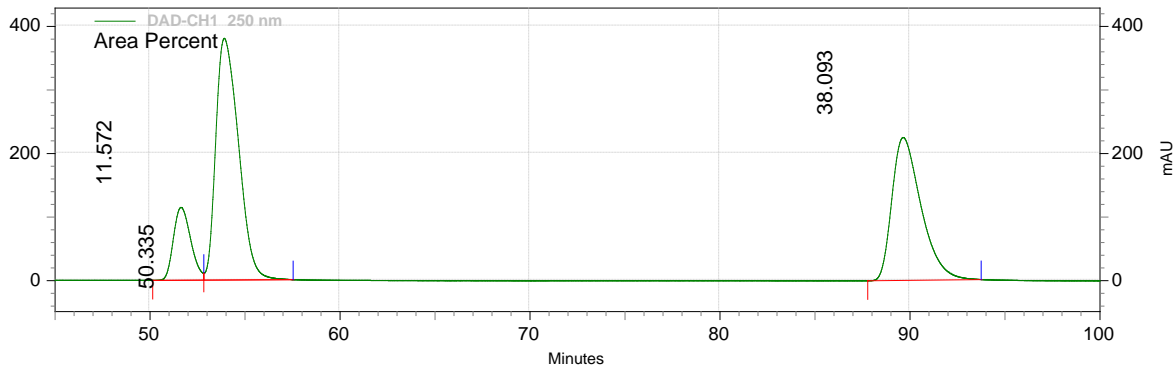

### DAD-CH1 250 nm Results

| Retention Time | Area             | Area %        |
|----------------|------------------|---------------|
| 51.633         | 29083244         | 11.57         |
| 53.907         | 126503815        | 50.34         |
| 89.640         | 95735506         | 38.09         |
| <b>Totals</b>  | <b>251322565</b> | <b>100.00</b> |

Data File: C:\EZChrom Elite\Enterprise\Projects\Default\Data\Pankaj\pritha\pv-04-646-3-5%IPA-0.5ml.min-150min-ADH-IC

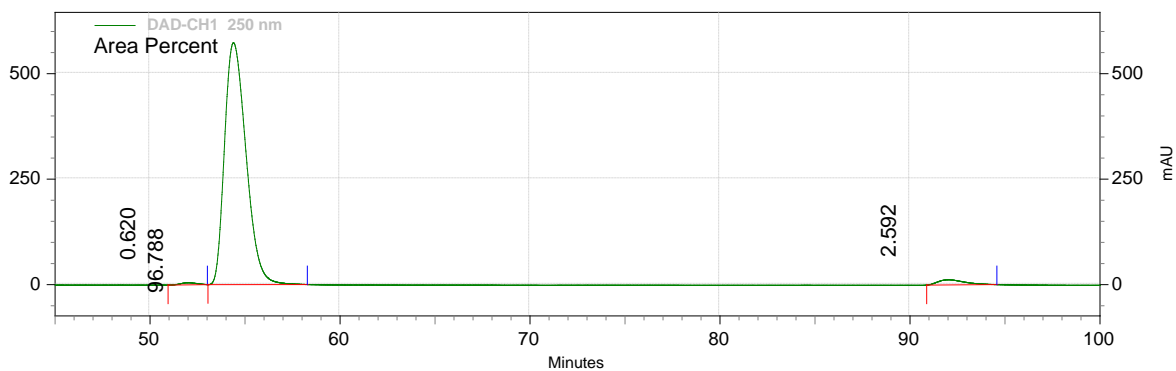

### DAD-CH1 250 nm Results

| Retention Time | Area             | Area %        |
|----------------|------------------|---------------|
| 52.000         | 1154839          | 0.62          |
| 54.393         | 180164566        | 96.79         |
| 92.013         | 4824093          | 2.59          |
| <b>Totals</b>  | <b>186143498</b> | <b>100.00</b> |

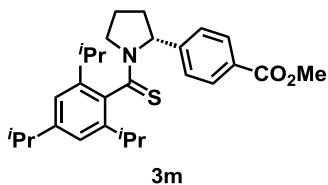

### Area % Report

Data File: C:\EZChrom Elite\Enterprise\Projects\Default\Data\Pankaj\pritha\pv-04-657-1-5%IPA-0.5ml.min-90min-ADH-ADH



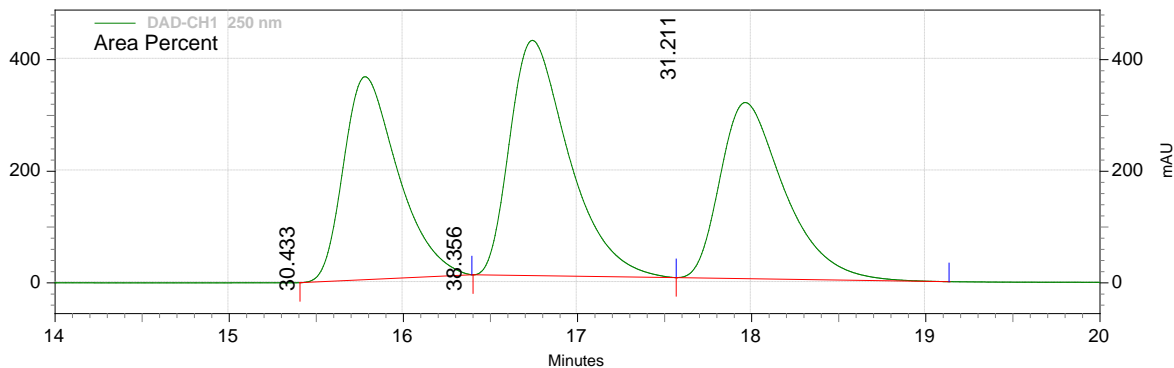

**DAD-CH1 250 nm Results**

| Retention Time | Area      | Area % |
|----------------|-----------|--------|
| 15.780         | 31572650  | 30.43  |
| 16.740         | 39792203  | 38.36  |
| 17.967         | 32380145  | 31.21  |
| Totals         | 103744998 | 100.00 |

Data File: C:\EZChrom Elite\Enterprise\Projects\Default\Data\Pankaj\pritha\pv-04-667-2-5%IPA-0.5ml.min-90min-ADH-ADH

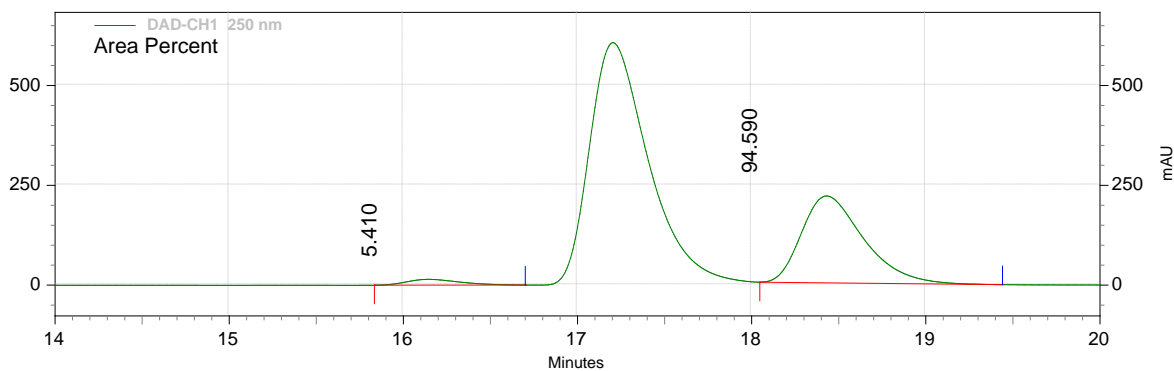

**DAD-CH1 250 nm Results**

| Retention Time | Area     | Area % |
|----------------|----------|--------|
| 16.147         | 1229846  | 5.41   |
| 18.433         | 21501226 | 94.59  |
| Totals         | 22731072 | 100.00 |

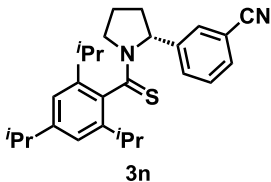

**Area % Report**

Data File: C:\EZChrom Elite\Enterprise\Projects\Default\Data\Pankaj\pritha\pv-04-664-1-rac-615-5%IPA-0.5ml.min-75min-ADH-IC

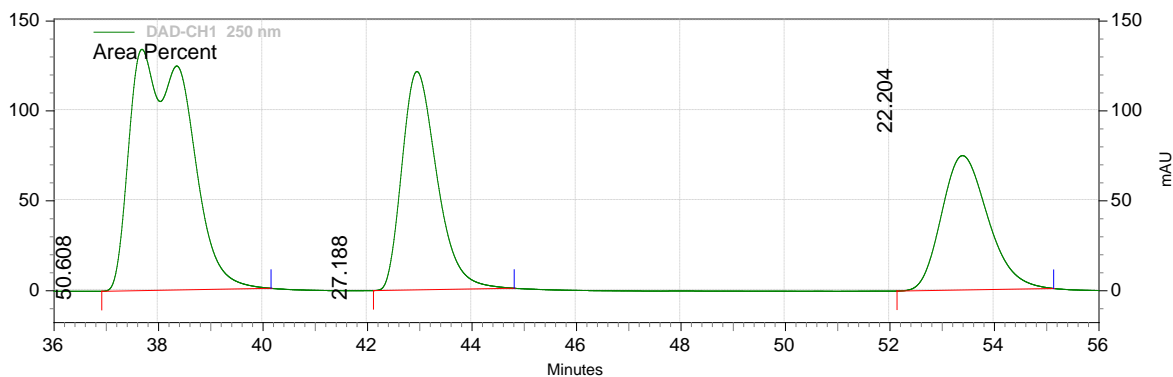

**DAD-CH1 250 nm Results**

| Retention Time | Area     | Area % |
|----------------|----------|--------|
| 37.680         | 42106719 | 50.61  |
| 42.947         | 22621055 | 27.19  |
| 53.387         | 18474257 | 22.20  |
| Totals         | 83202031 | 100.00 |

Data File: C:\EZChrom Elite\Enterprise\Projects\Default\Data\Pankaj\pritha\pv-04-664-1-5%IPA-0.5ml.min-75min-ADH-IC

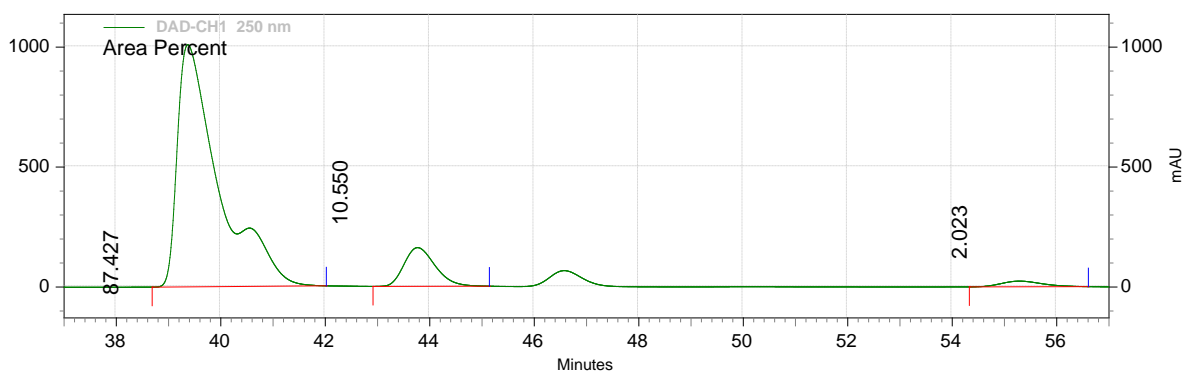

**DAD-CH1 250 nm Results**

| Retention Time | Area      | Area % |
|----------------|-----------|--------|
| 39.367         | 221294207 | 87.43  |
| 43.767         | 26704346  | 10.55  |
| 55.287         | 5120296   | 2.02   |
| Totals         | 253118849 | 100.00 |

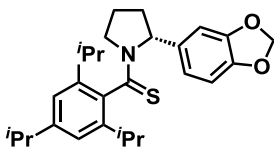

3o

**Area % Report**

Data File: C:\EZChrom Elite\Enterprise\Projects\Default\Data\Pankaj\pritha\pv-04-614-2-5%IPA-0.5ml.min-120min-IC-IC

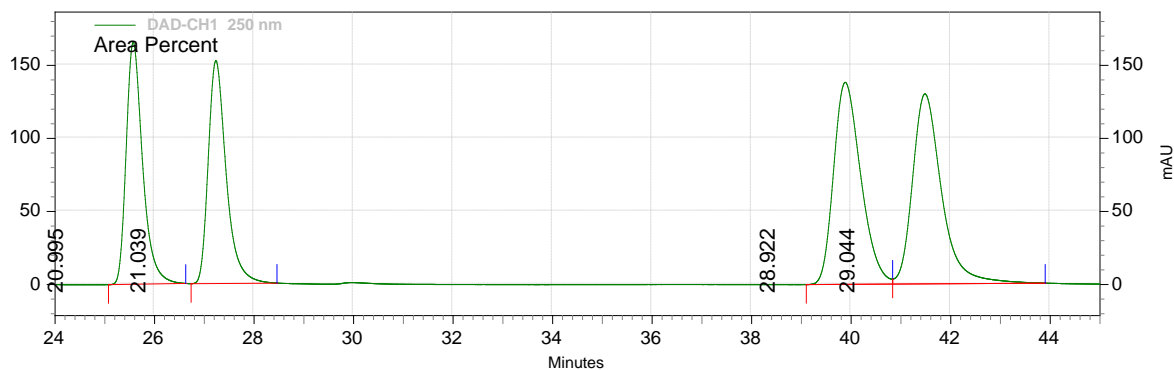

**DAD-CH1 250 nm Results**

| Retention Time | Area            | Area %        |
|----------------|-----------------|---------------|
| 25.573         | 15233920        | 20.99         |
| 27.233         | 15266057        | 21.04         |
| 39.880         | 20986174        | 28.92         |
| 41.480         | 21074387        | 29.04         |
| <b>Totals</b>  | <b>72560538</b> | <b>100.00</b> |

Data File: C:\EZChrom Elite\Enterprise\Projects\Default\Data\Pankaj\pritha\pv-04-622-1-5% IPA-0.5ml.min-120min-IC-IC

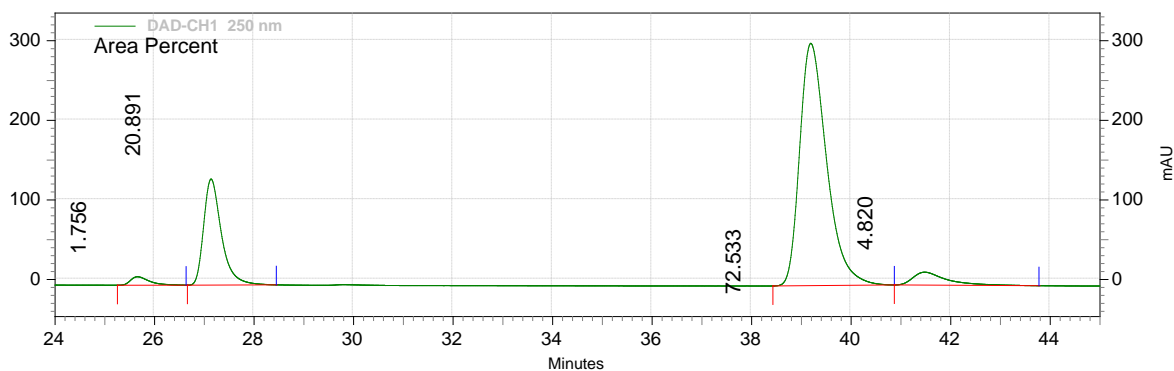

**DAD-CH1 250 nm Results**

| Retention Time | Area            | Area %        |
|----------------|-----------------|---------------|
| 25.660         | 1111742         | 1.76          |
| 27.133         | 13228584        | 20.89         |
| 39.187         | 45929882        | 72.53         |
| 41.480         | 3052269         | 4.82          |
| <b>Totals</b>  | <b>63322477</b> | <b>100.00</b> |

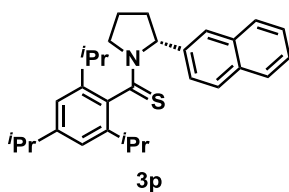

**Area % Report**

Data File: C:\EZChrom Elite\Enterprise\Projects\Default\Data\Pankaj\pritha\pv-04-675-rac-669-1-1%IPA-0.5ml.min-60min-IC-IC

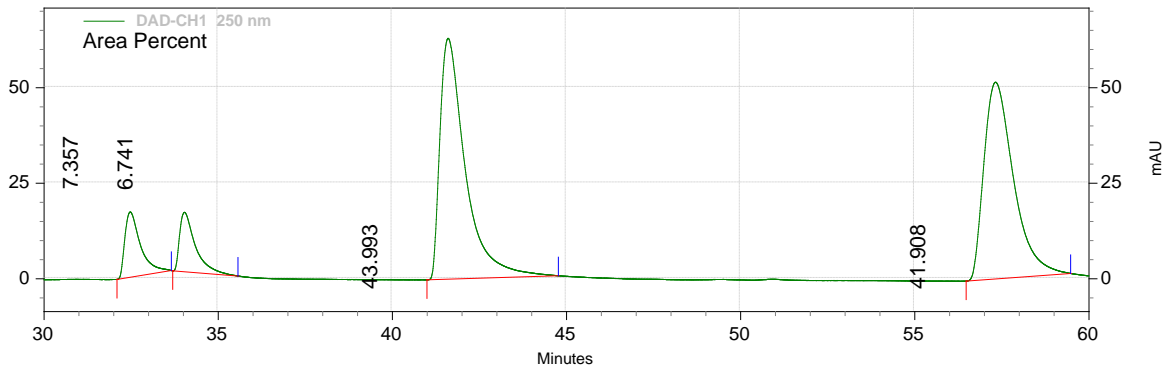

#### DAD-CH1 250 nm Results

| Retention Time | Area            | Area %        |
|----------------|-----------------|---------------|
| 32.473         | 2136277         | 7.36          |
| 34.033         | 1957312         | 6.74          |
| 41.600         | 12773658        | 43.99         |
| 57.320         | 12168351        | 41.91         |
| <b>Totals</b>  | <b>29035598</b> | <b>100.00</b> |

Data File: C:\EZChrom Elite\Enterprise\Projects\Default\Data\Pankaj\pritha\pv-04-675-1-1%IPA-0.5ml.min-60min-IC-IC

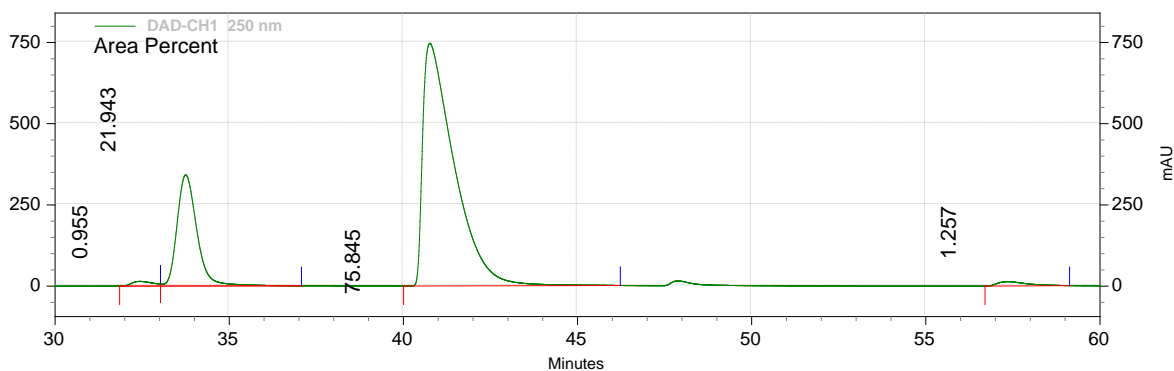

#### DAD-CH1 250 nm Results

| Retention Time | Area             | Area %        |
|----------------|------------------|---------------|
| 32.433         | 2349216          | 0.96          |
| 33.753         | 53961097         | 21.94         |
| 40.760         | 186514787        | 75.84         |
| 57.353         | 3090692          | 1.26          |
| <b>Totals</b>  | <b>245915792</b> | <b>100.00</b> |

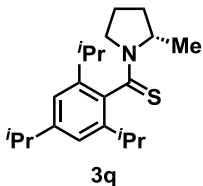

#### Area % Report

Data File: C:\EZChrom Elite\Enterprise\Projects\Default\Data\Pankaj\pritha\pv-05-681-recent-1%IPA-0.5ml.min-40min-IC

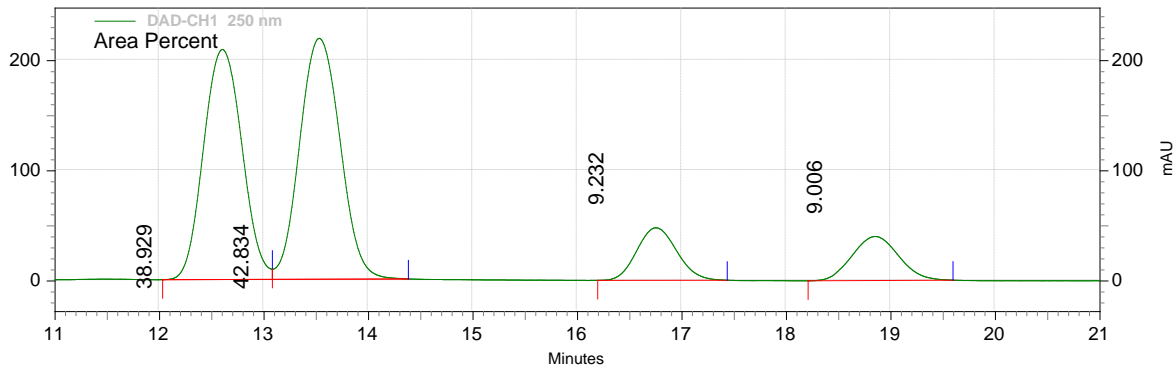

**DAD-CH1 250 nm Results**

| Retention Time | Area            | Area %        |
|----------------|-----------------|---------------|
| 12.600         | 21400445        | 38.93         |
| 13.527         | 23547316        | 42.83         |
| 16.753         | 5074922         | 9.23          |
| 18.847         | 4950849         | 9.01          |
| <b>Totals</b>  | <b>54973532</b> | <b>100.00</b> |

Data File: C:\EZChrom Elite\Enterprise\Projects\Default\Data\Pankaj\pritha\pv-05-754-1-1%IPA-0.5ml.min-40min-IC

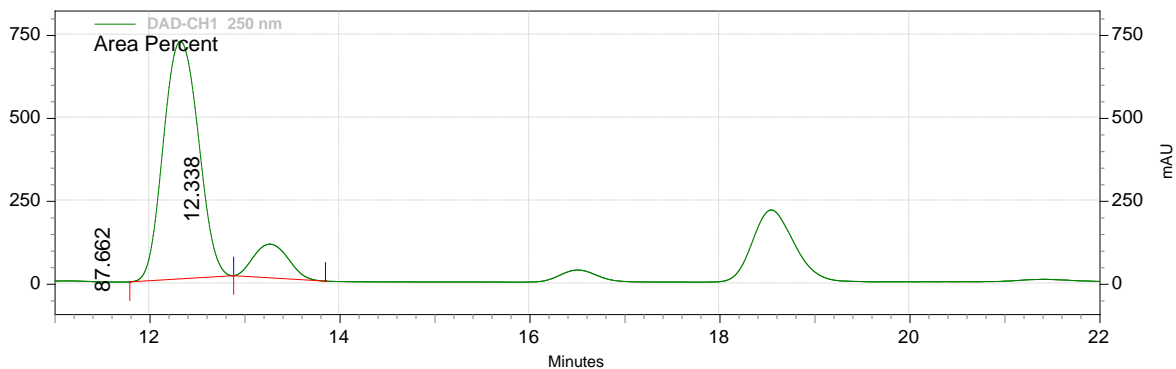

**DAD-CH1 250 nm Results**

| Retention Time | Area            | Area %        |
|----------------|-----------------|---------------|
| 12.320         | 73337621        | 87.66         |
| 13.260         | 10321513        | 12.34         |
| <b>Totals</b>  | <b>83659134</b> | <b>100.00</b> |

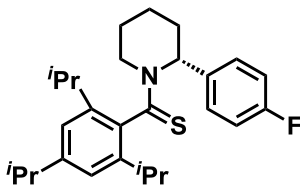

**Area % Report**

Data File: C:\EZChrom Elite\Enterprise\Projects\Default\Data\Pankaj\pritha\pv-03-543-1-5%IPA-0.5ml.min-60min-ADH

Method: C:\EZChrom Elite\Enterprise\Projects\Default\Method\A 60 min without fc 0.5 ml per min.met

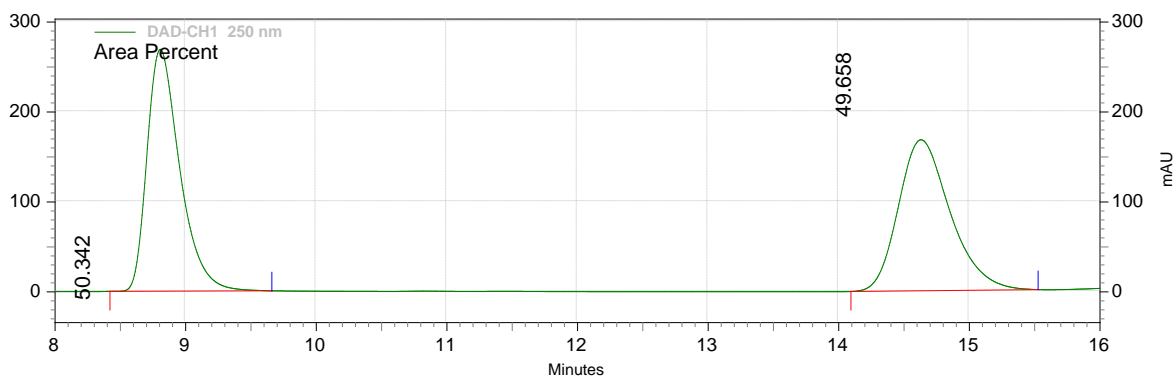

**DAD-CH1 250 nm Results**

| Retention Time | Area            | Area %        |
|----------------|-----------------|---------------|
| 8.807          | 18720025        | 50.34         |
| 14.633         | 18465987        | 49.66         |
| <b>Totals</b>  | <b>37186012</b> | <b>100.00</b> |

Data File: C:\EZChrom Elite\Enterprise\Projects\Default\Data\Pankaj\pritha\pv-04-559-1-5% IPA-0.5ml.min-60min-ADH

Method: C:\EZChrom Elite\Enterprise\Projects\Default\Method\A 60 min without fc 0.5 ml per min.met

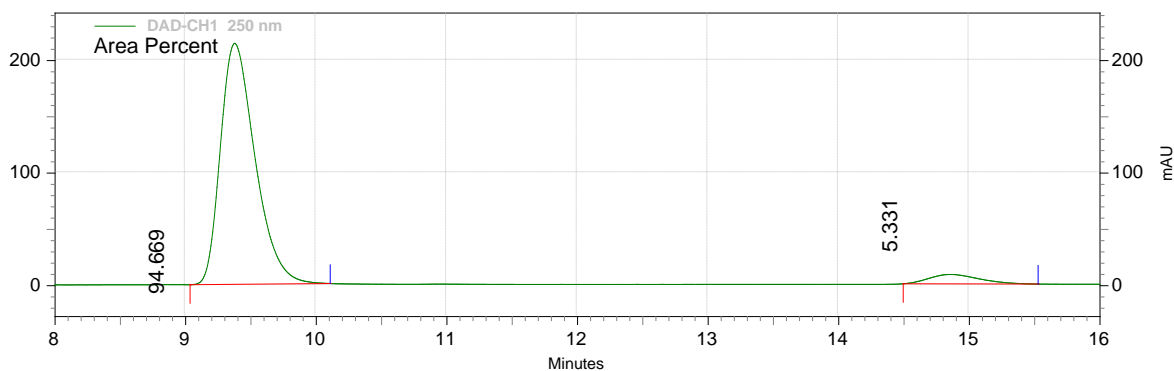

**DAD-CH1 250 nm Results**

| Retention Time | Area            | Area %        |
|----------------|-----------------|---------------|
| 9.373          | 15781094        | 94.67         |
| 14.853         | 888740          | 5.33          |
| <b>Totals</b>  | <b>16669834</b> | <b>100.00</b> |

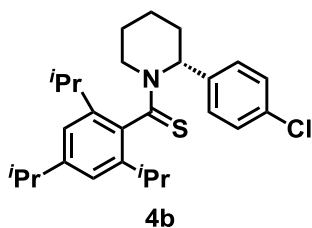

**Area % Report**

Data File: C:\EZChrom Elite\Enterprise\Projects\Default\Data\Pankaj\pj3-84AArac-CORR--ADH-2-0.5

Method: C:\EZChrom Elite\Enterprise\Projects\Default\Method\A 50 min without fc 0.5 ml per min.met

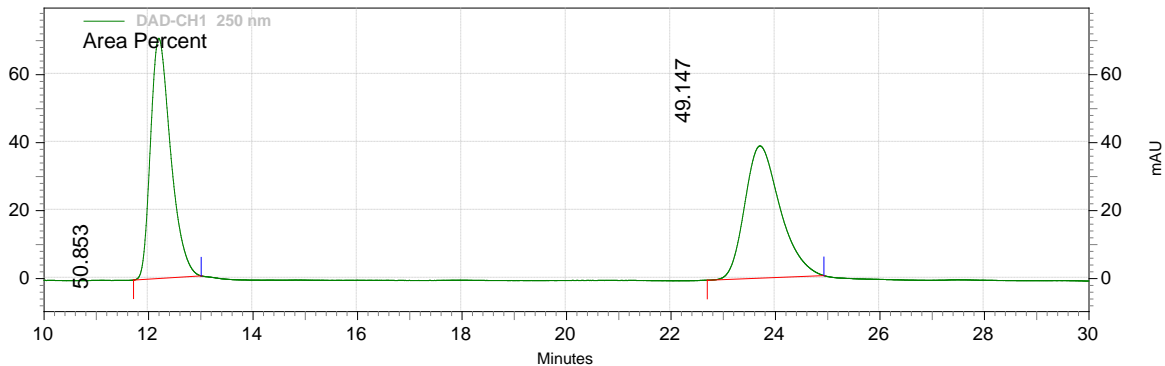

### DAD-CH1 250 nm Results

| Retention Time | Area     | Area % |
|----------------|----------|--------|
| 12.193         | 7573190  | 50.85  |
| 23.707         | 7319151  | 49.15  |
| Totals         | 14892341 | 100.00 |

Data File: C:\EZChrom Elite\Enterprise\Projects\Default\Data\Pankaj\pj3-84Dchiral--ADH-2-0.5

Method: C:\EZChrom Elite\Enterprise\Projects\Default\Method\A 50 min without fc 0.5 ml per min.met

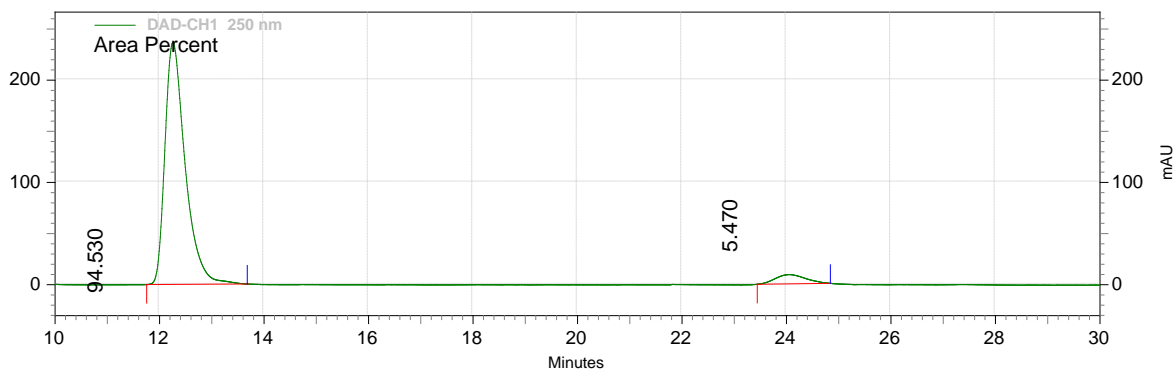

### DAD-CH1 250 nm Results

| Retention Time | Area     | Area % |
|----------------|----------|--------|
| 12.253         | 25452983 | 94.53  |
| 24.053         | 1472813  | 5.47   |
| Totals         | 26925796 | 100.00 |

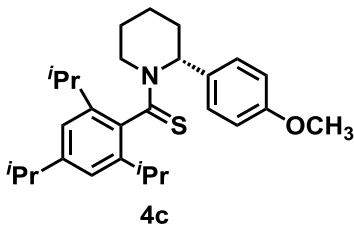

Data File: C:\EZChrom Elite\Enterprise\Projects\Default\Data\Pankaj\pj3-38A-racemic-ADH

Method: C:\EZChrom Elite\Enterprise\Projects\Default\Method\A 40 min without fc 0.5 ml per min.met

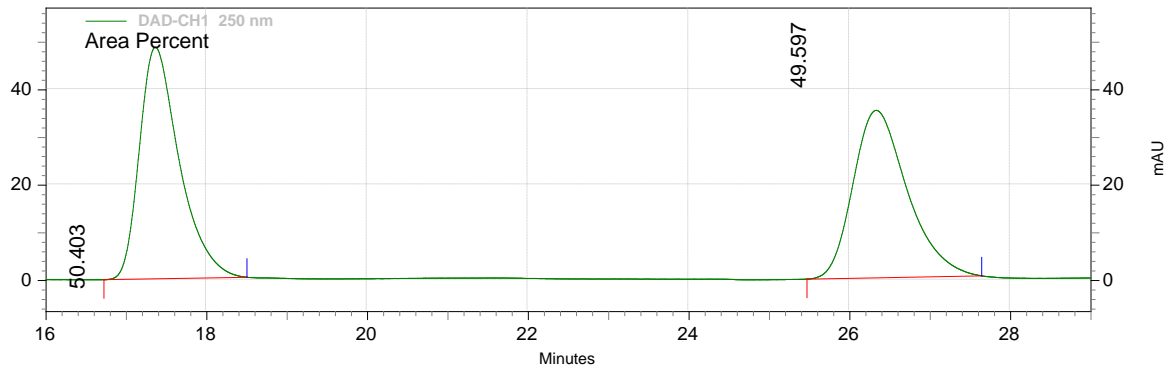

### DAD-CH1 250 nm Results

| Retention Time | Area     | Area % |
|----------------|----------|--------|
| 17.360         | 6698812  | 50.40  |
| 26.327         | 6591598  | 49.60  |
| Totals         | 13290410 | 100.00 |

Data File: C:\EZChrom Elite\Enterprise\Projects\Default\Data\Pankaj\pj3-38A-ADH

Method: C:\EZChrom Elite\Enterprise\Projects\Default\Method\A 40 min without fc 0.5 ml per min.met

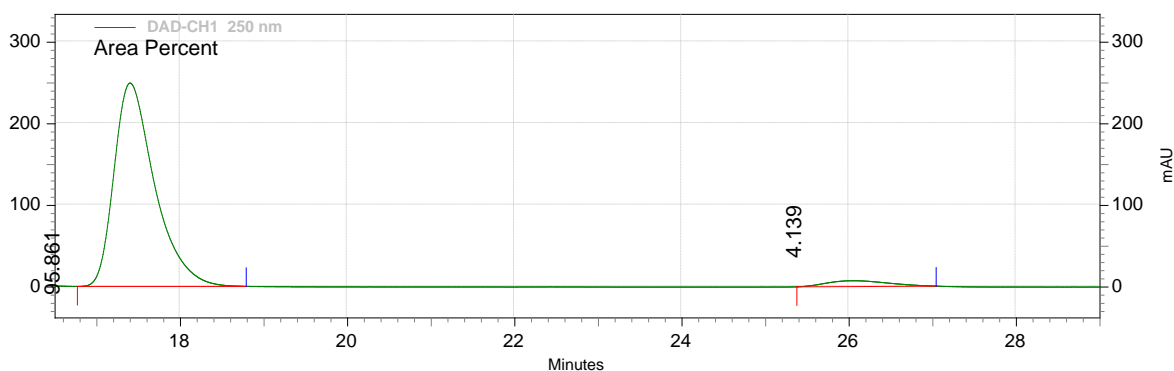

### DAD-CH1 250 nm Results

| Retention Time | Area     | Area % |
|----------------|----------|--------|
| 17.400         | 33593865 | 95.86  |
| 26.053         | 1450632  | 4.14   |
| Totals         | 35044497 | 100.00 |

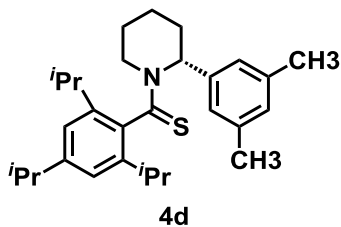

### Area % Report

Data File: C:\EZChrom Elite\Enterprise\Projects\Default\Data\Pankaj\pj3-84BArac-COR--ADH-0.5-0.5

Method: C:\EZChrom Elite\Enterprise\Projects\Default\Method\A 50 min without fc 0.5 ml per min.met



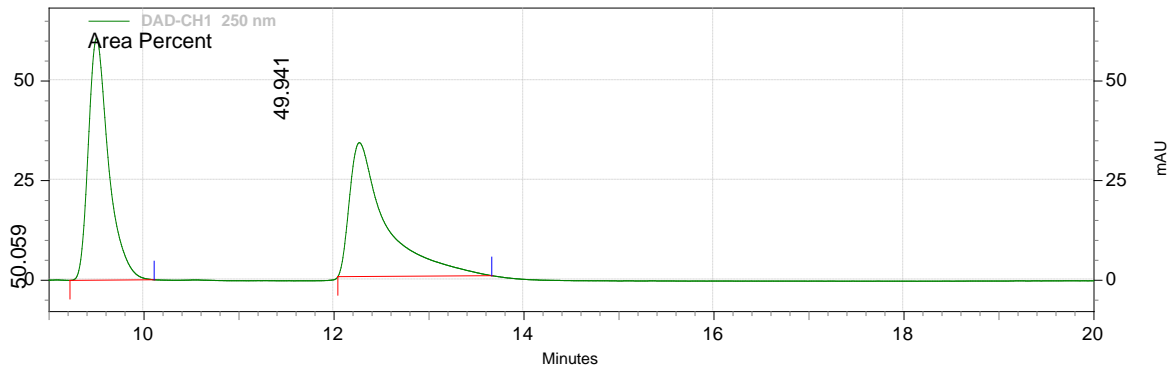

**DAD-CH1 250 nm Results**

| Retention Time | Area           | Area %        |
|----------------|----------------|---------------|
| 9.500          | 3593412        | 50.06         |
| 12.267         | 3584970        | 49.94         |
| <b>Totals</b>  | <b>7178382</b> | <b>100.00</b> |

Data File: C:\EZChrom Elite\Enterprise\Projects\Default\Data\Pankaj\pj3-84Echiral--ADH-0.5-0.5  
 Method: C:\EZChrom Elite\Enterprise\Projects\Default\Method\A 50 min without fc 0.5 ml per min.met

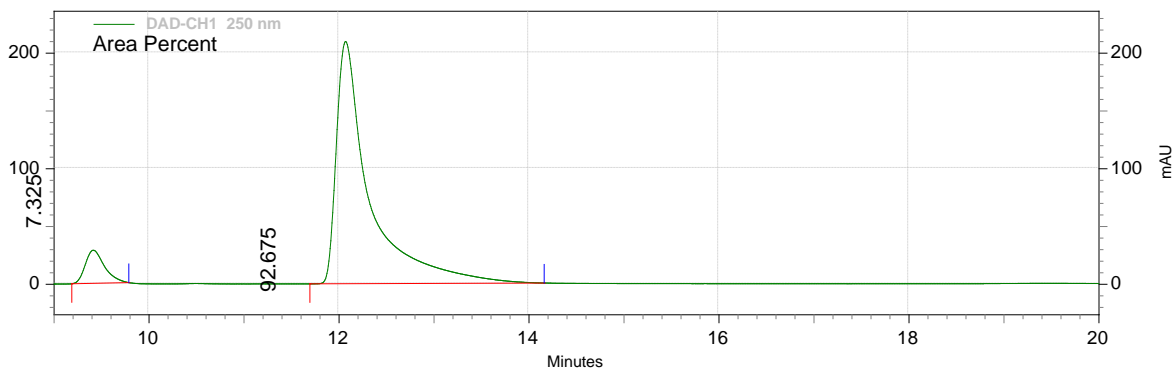

| Retention Time | Area            | Area %        |
|----------------|-----------------|---------------|
| 9.413          | 1608020         | 7.33          |
| 12.067         | 20343985        | 92.67         |
| <b>Totals</b>  | <b>21952005</b> | <b>100.00</b> |

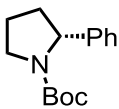

**6**

**Area % Report**

Data File: C:\EZChrom Elite\Enterprise\Projects\Default\Data\Pankaj\PPBoc-pure-IC-5-0.5  
 Method: C:\EZChrom Elite\Enterprise\Projects\Default\Method\untitled.met

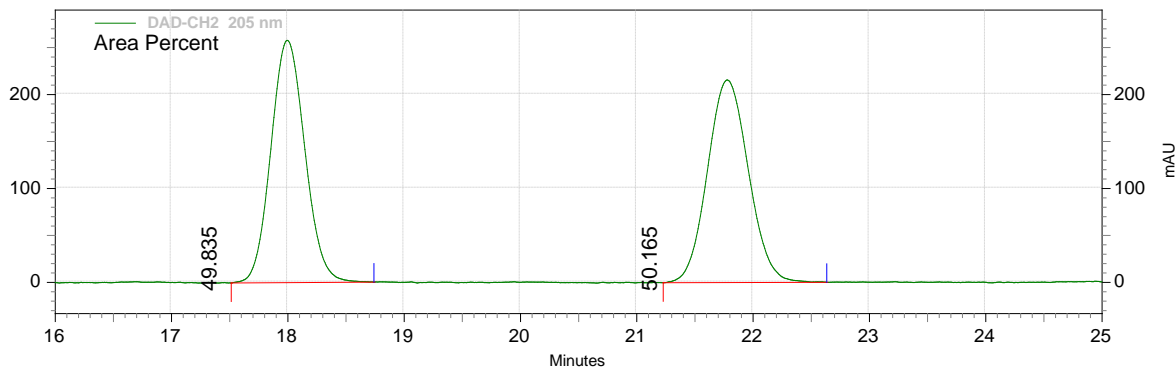

### DAD-CH2 205 nm Results

| Retention Time | Area     | Area % |
|----------------|----------|--------|
| 17.993         | 20986575 | 49.83  |
| 21.780         | 21125754 | 50.17  |
| Totals         | 42112329 | 100.00 |

Data File: C:\EZChrom Elite\Enterprise\Projects\Default\Data\Pankaj\52B-IC-5-0.5  
 Method: C:\EZChrom Elite\Enterprise\Projects\Default\Method\untitled.met

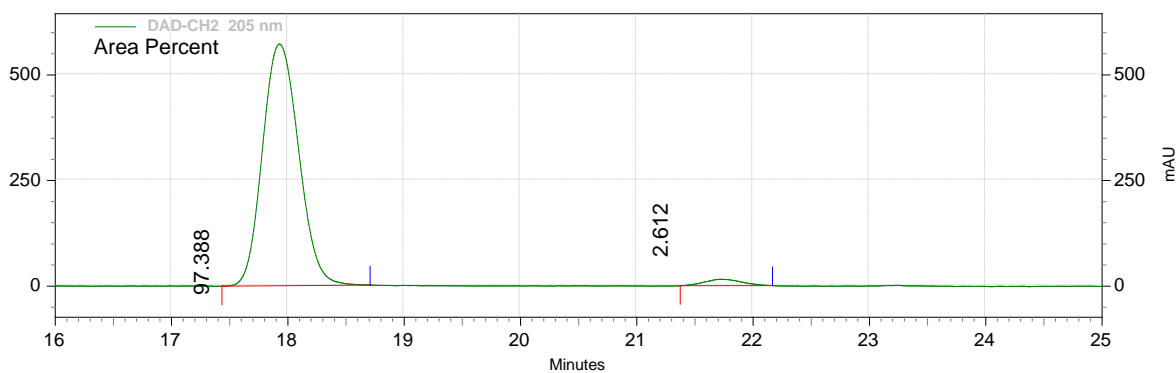

### DAD-CH2 205 nm Results

| Retention Time | Area     | Area % |
|----------------|----------|--------|
| 17.927         | 49458439 | 97.39  |
| 21.720         | 1326334  | 2.61   |
| Totals         | 50784773 | 100.00 |

Datafile: C:\YuLabData\GangChen\Pankaj112Chiral-3.dat Method:  
 C:\YuLabData\wqf\method\2% 0.5 90 min.met

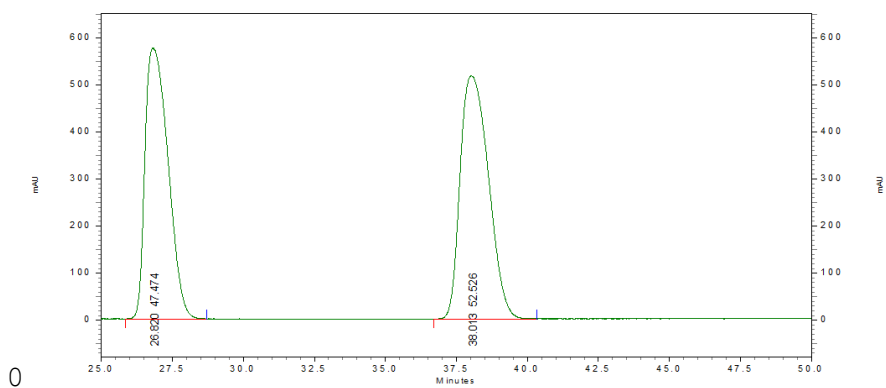

| Name        | RT (min) | Area Percent |
|-------------|----------|--------------|
| Sample Data | 26.820   | 47.474       |
|             | 38.013   | 52.526       |

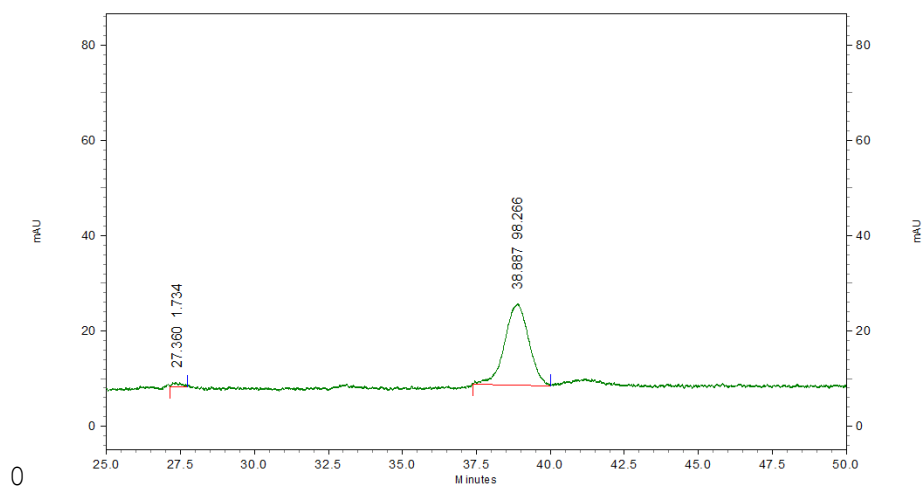

| Name        | RT (min) | Conc (ng) |
|-------------|----------|-----------|
| Sample Data | 27.360   | 1.734     |
|             | 38.887   | 98.266    |

## <sup>1</sup>H and <sup>13</sup>C NMR Spectra

pj3-58 batch2.1.fid

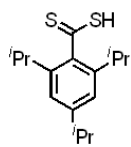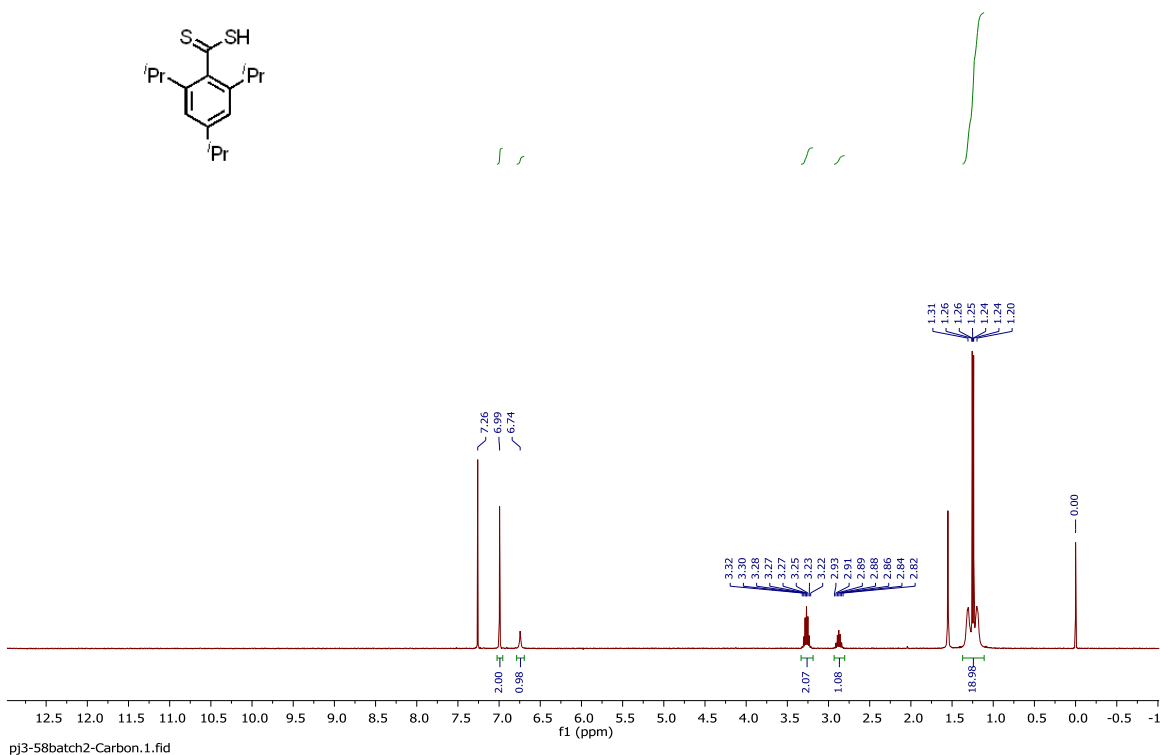

pj3-58batch2-Carbon.1.fid

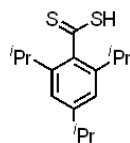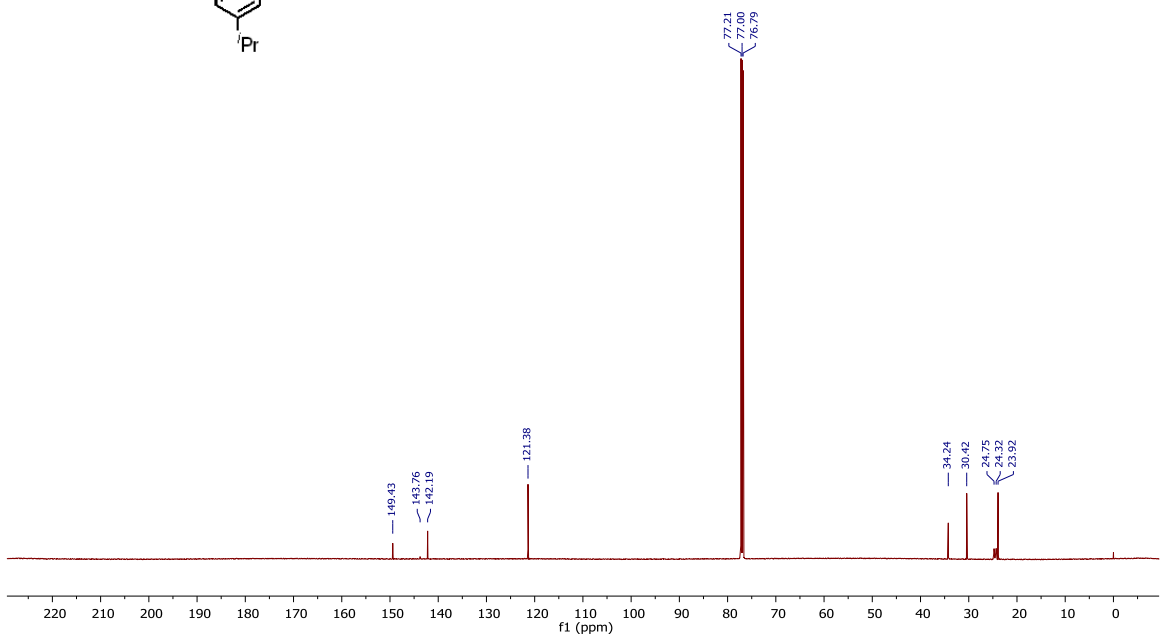

pj3-59batch2.1.fid

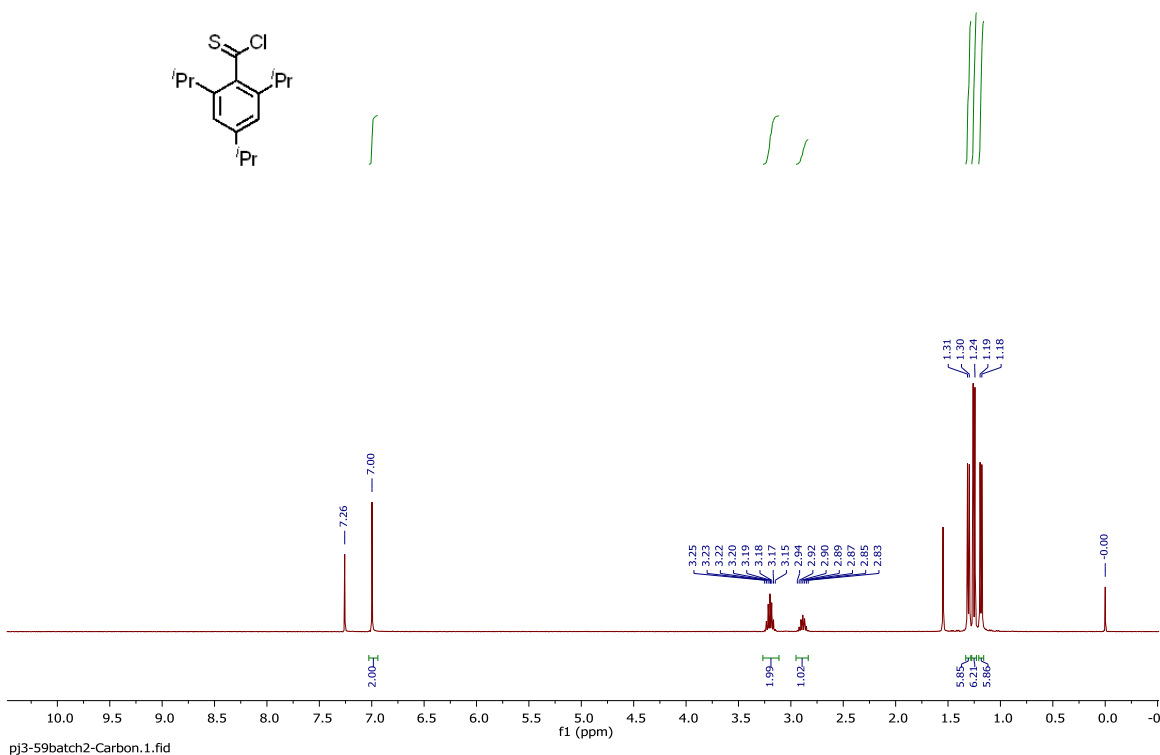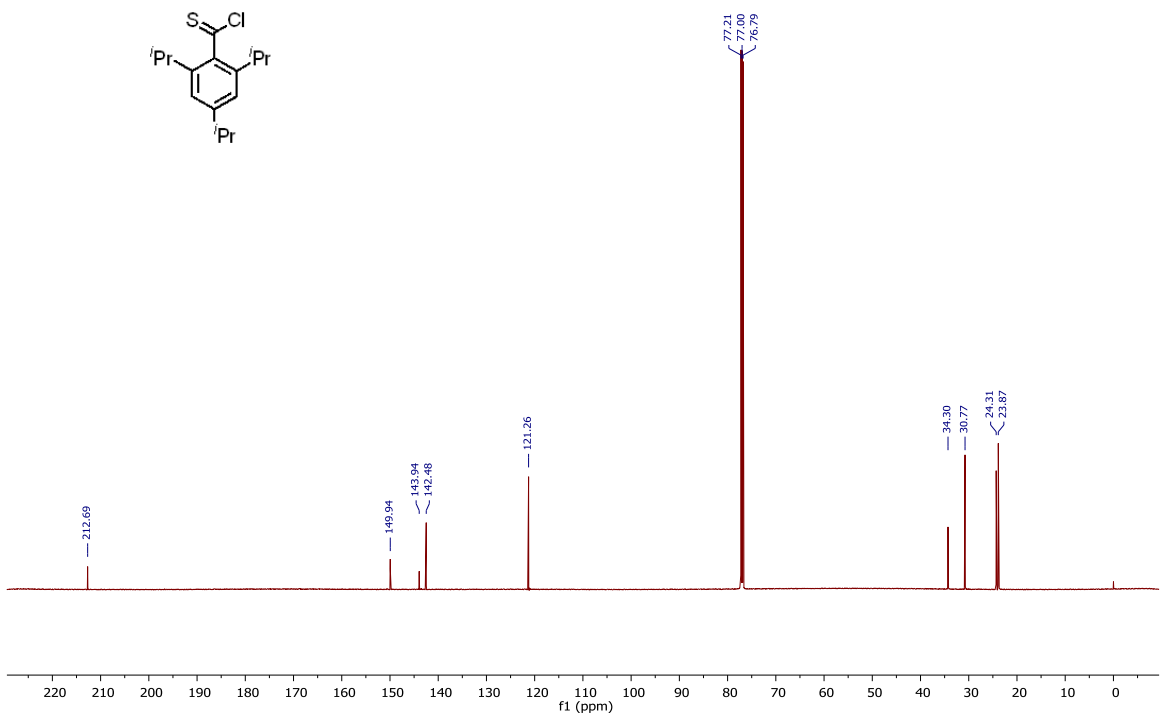

pj-pyrrolidine-SM-paper.1.fid

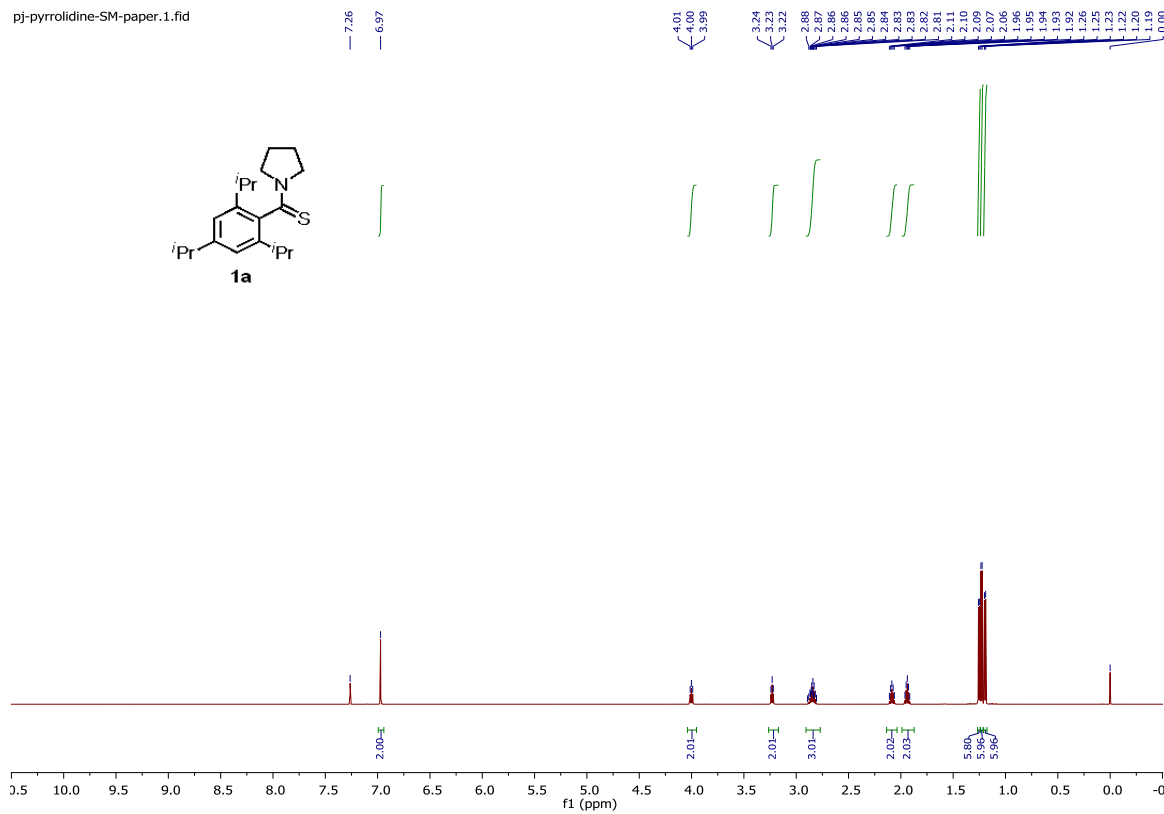

pj-pyrrolidine-SM-paper.2.fid

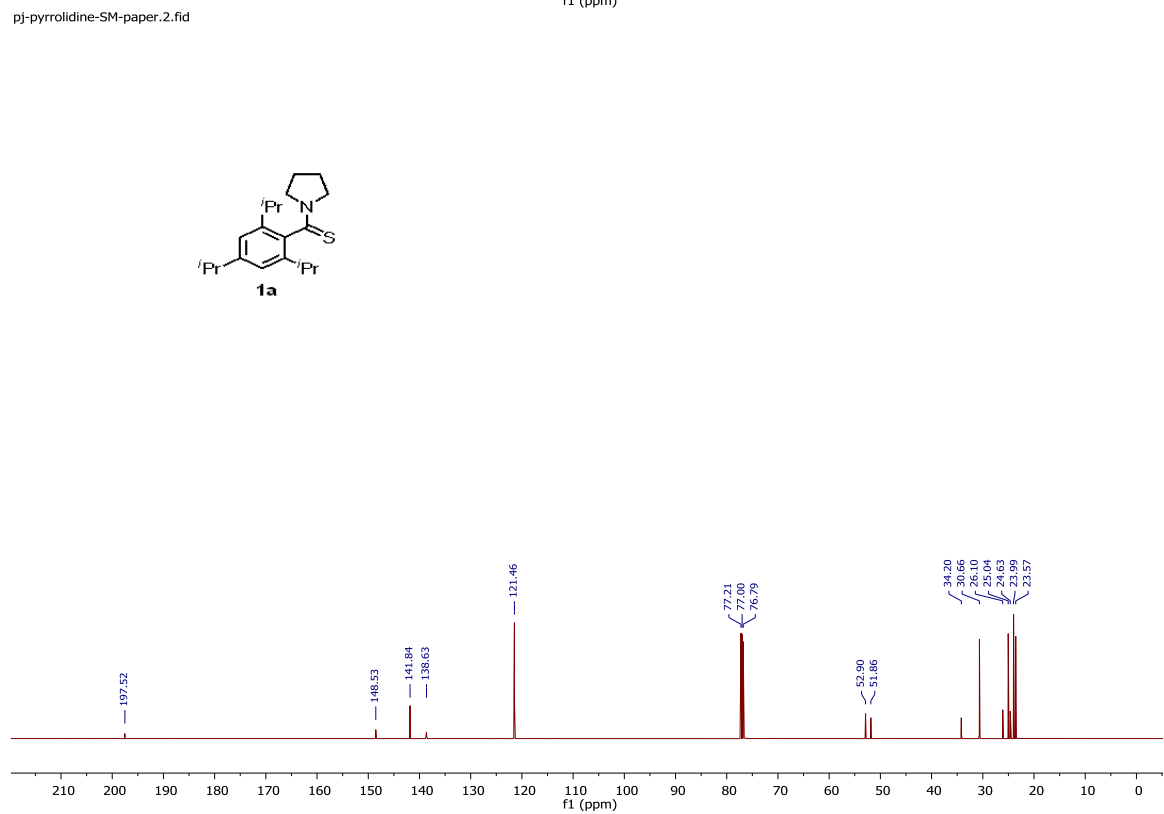

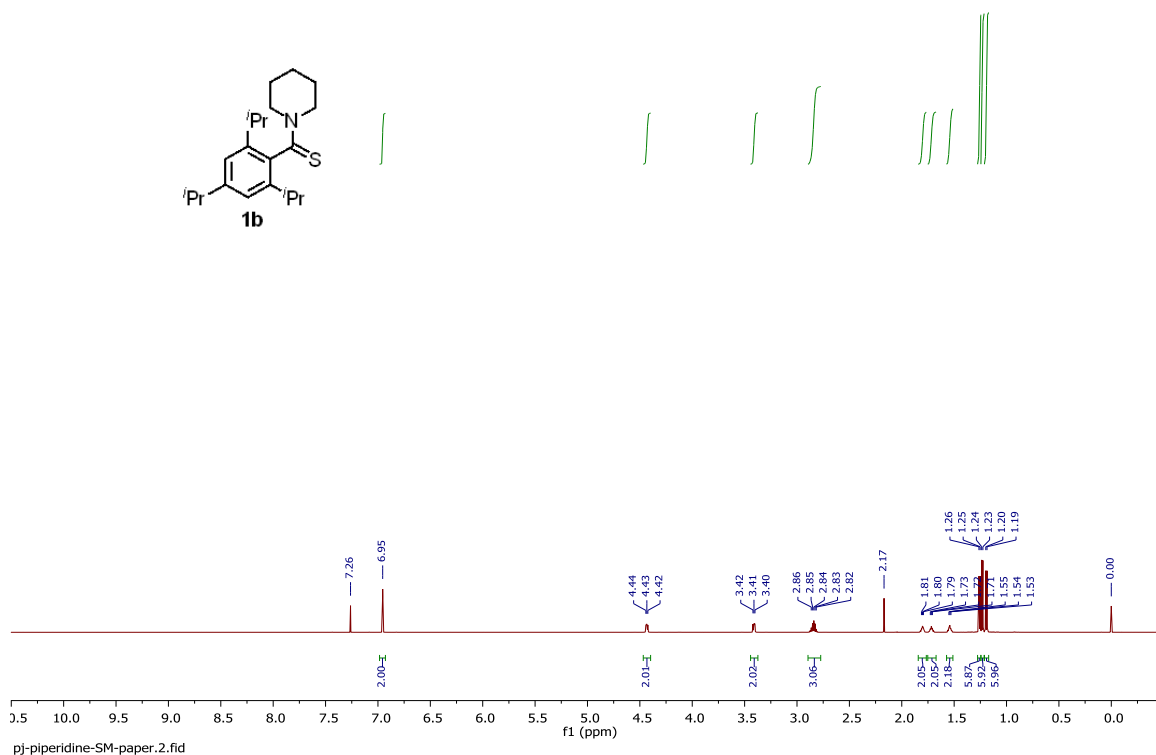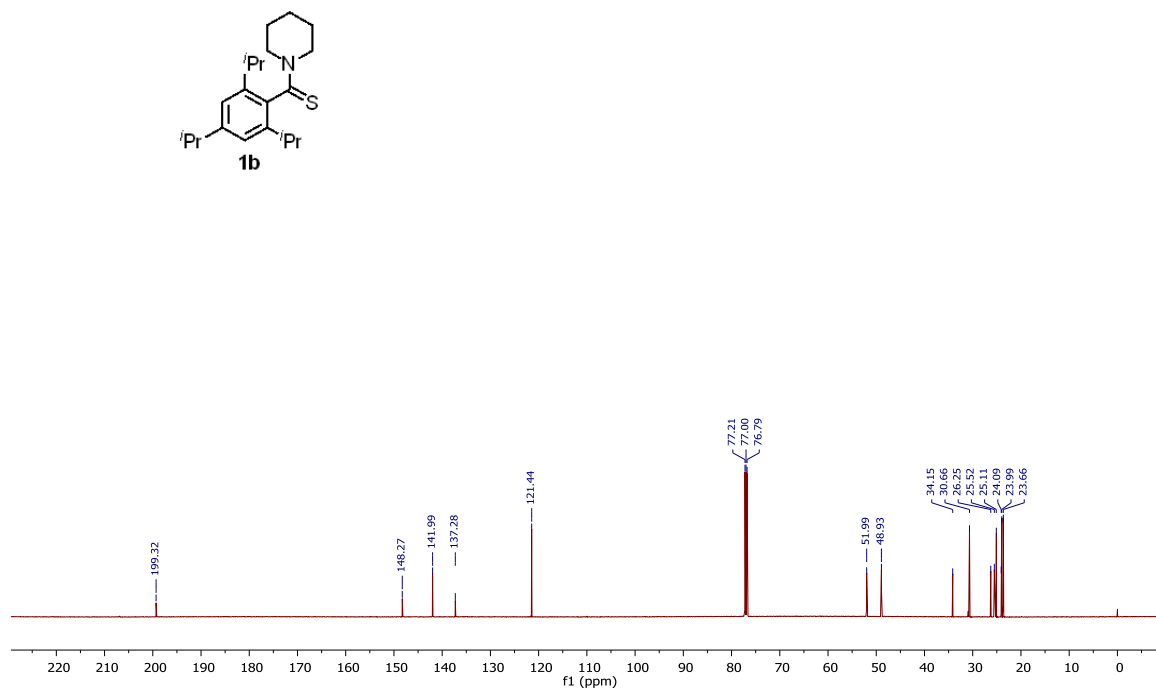

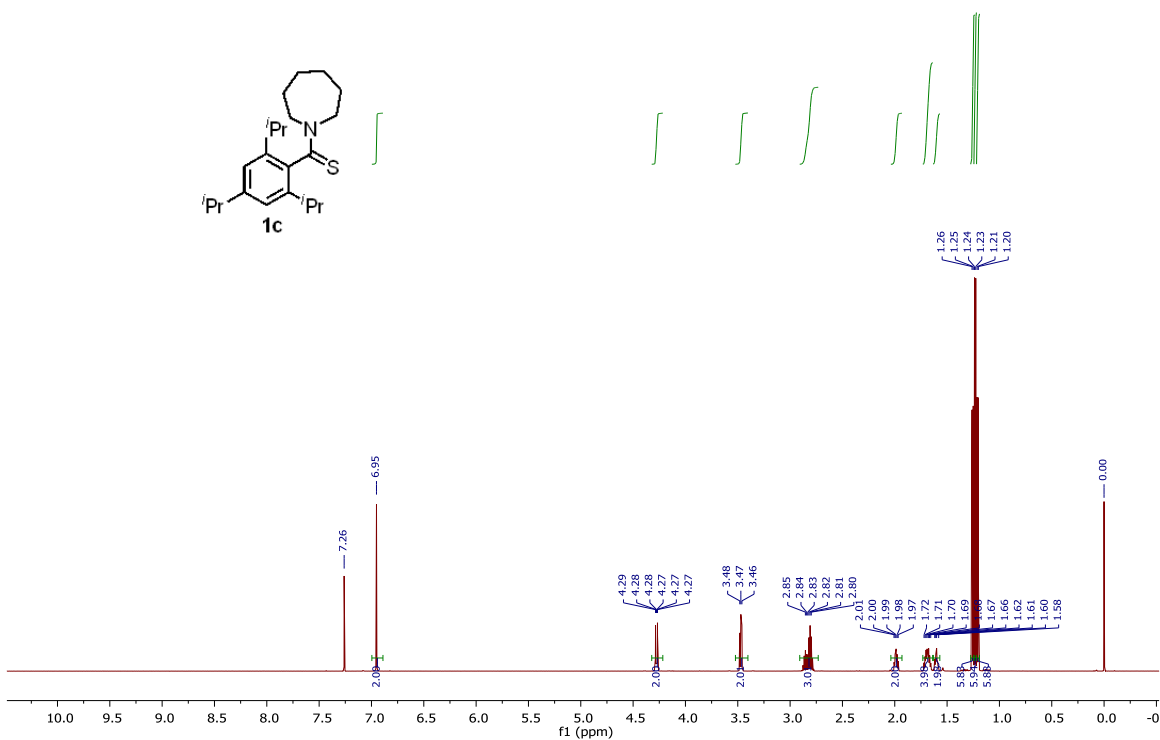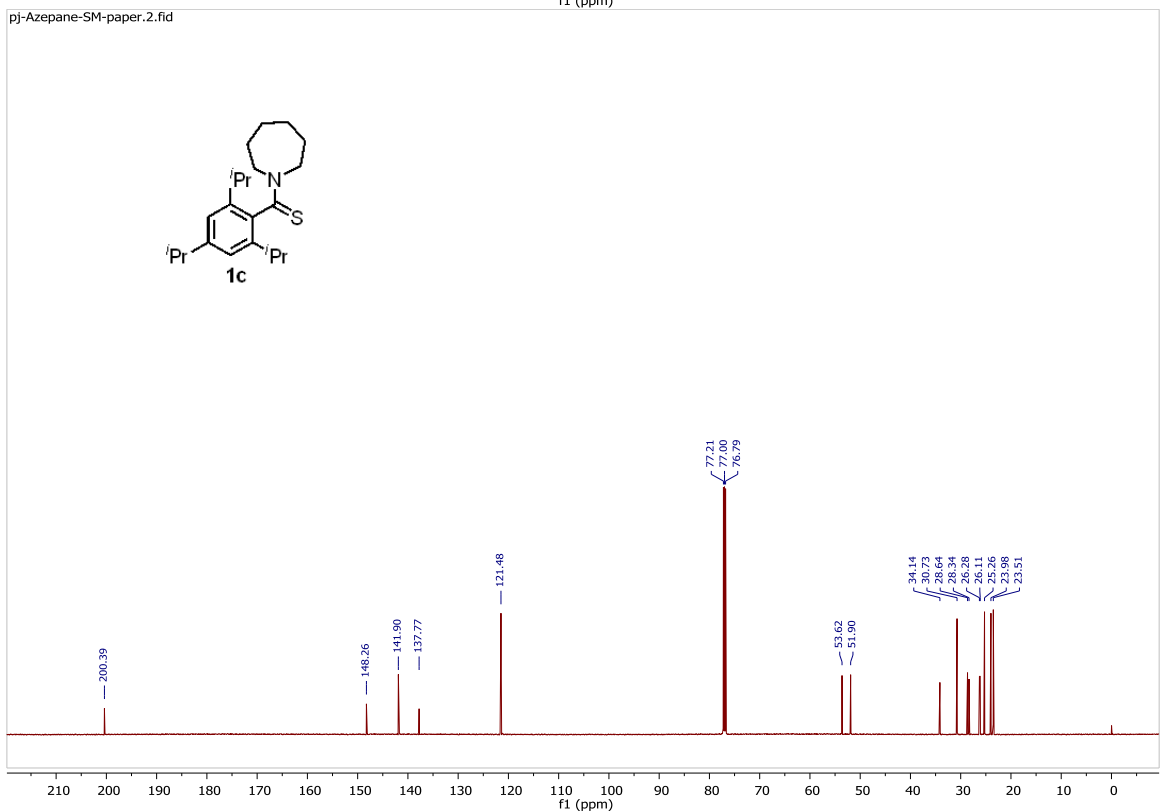



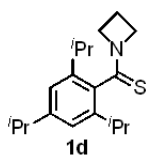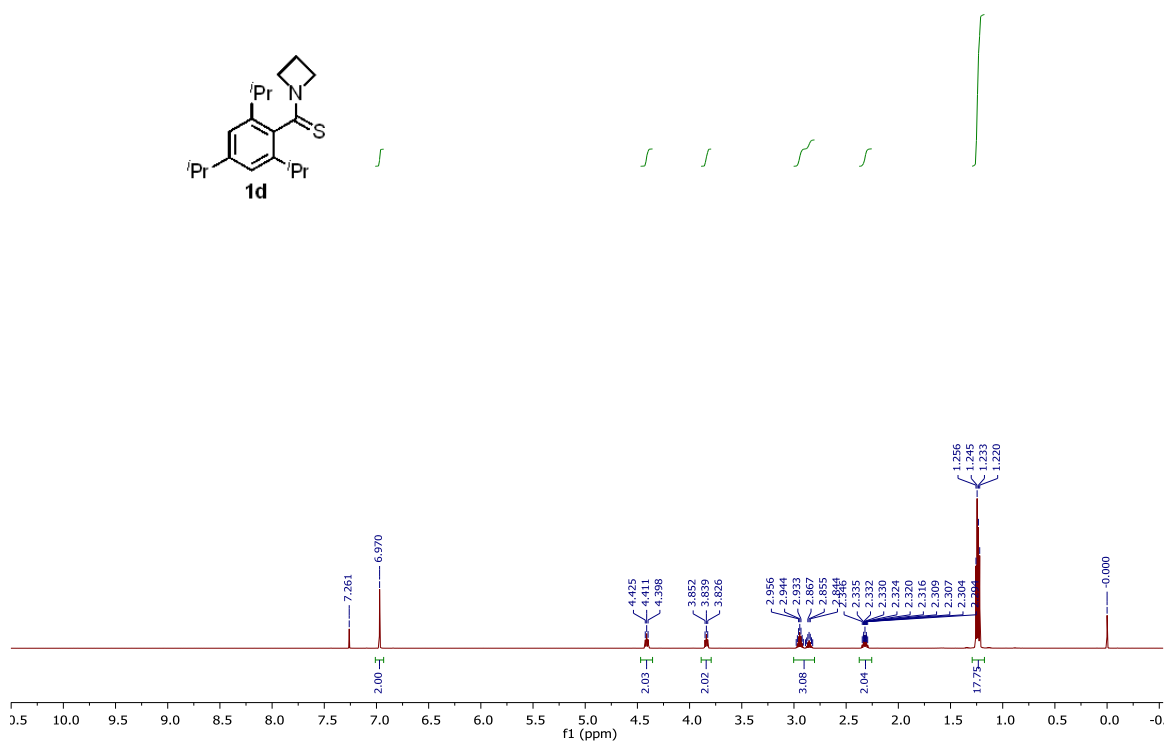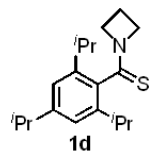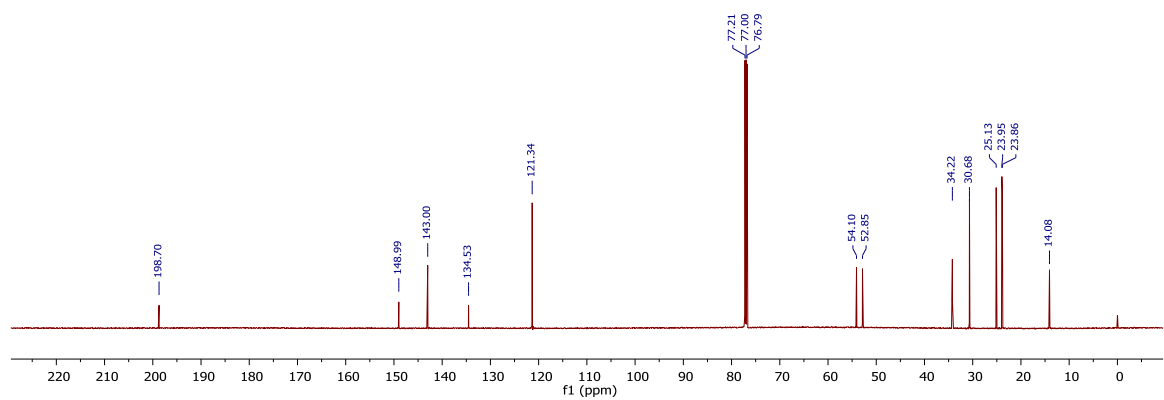

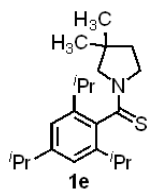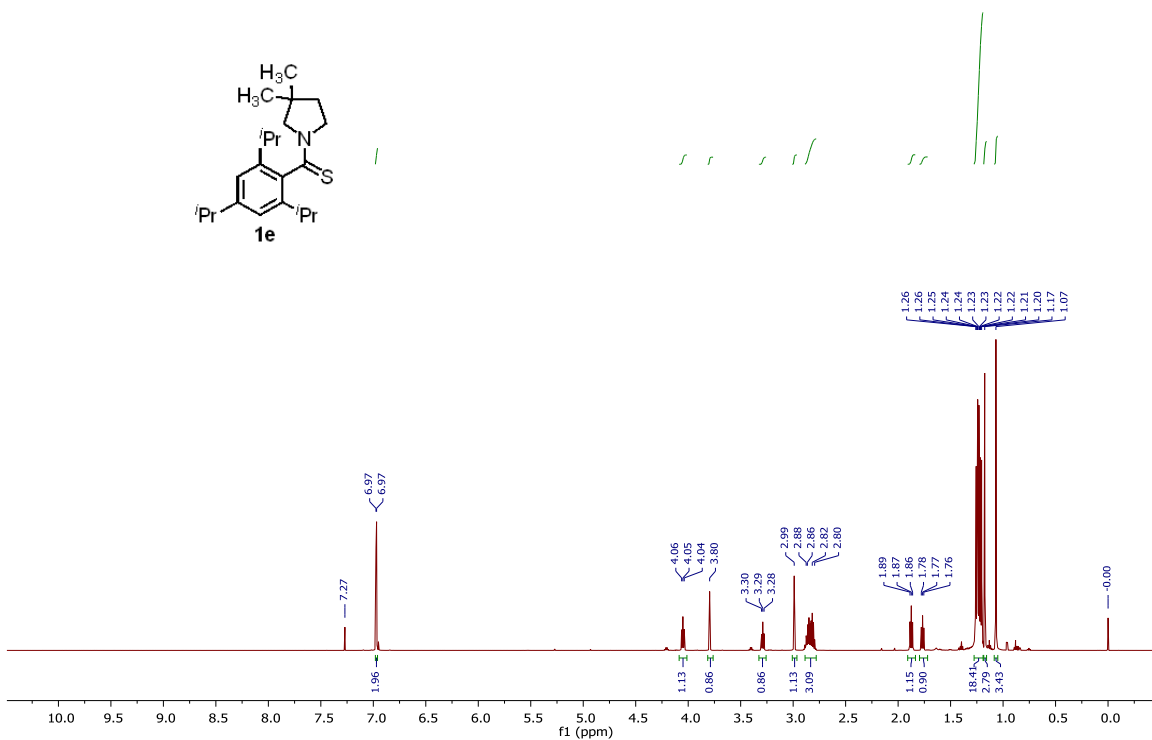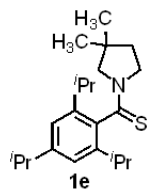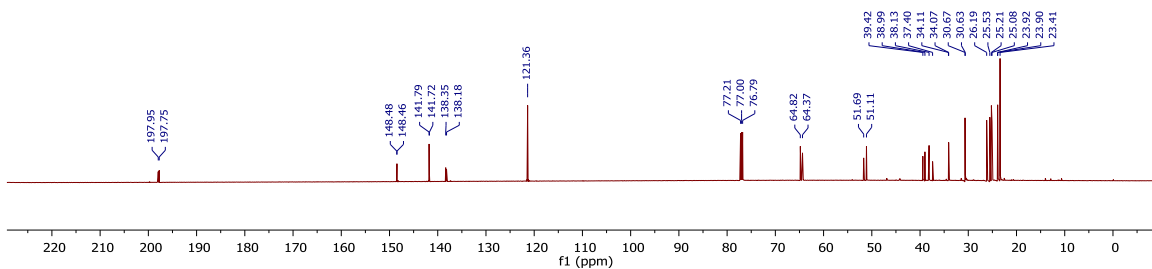

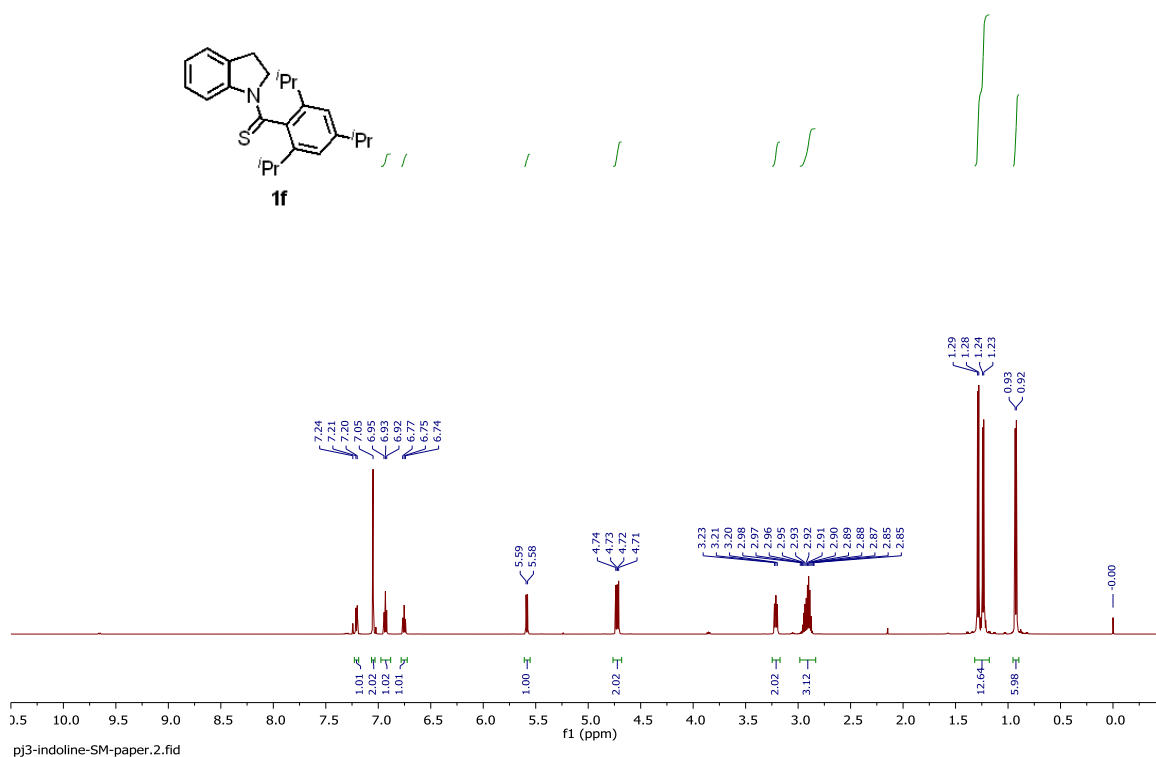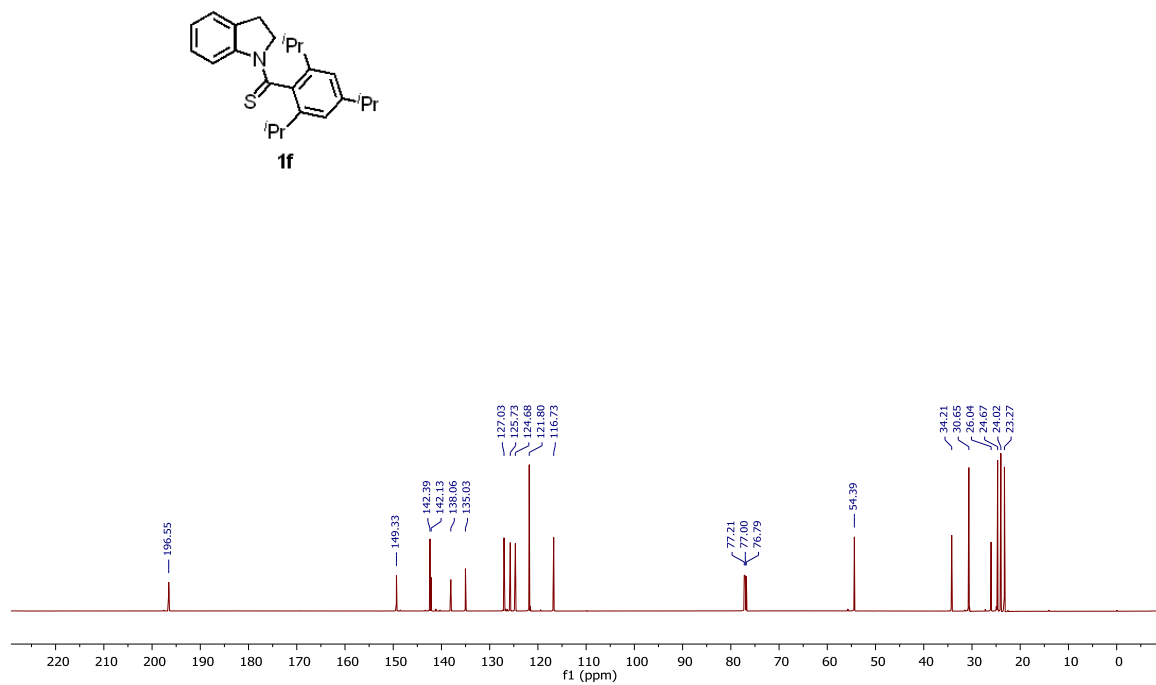



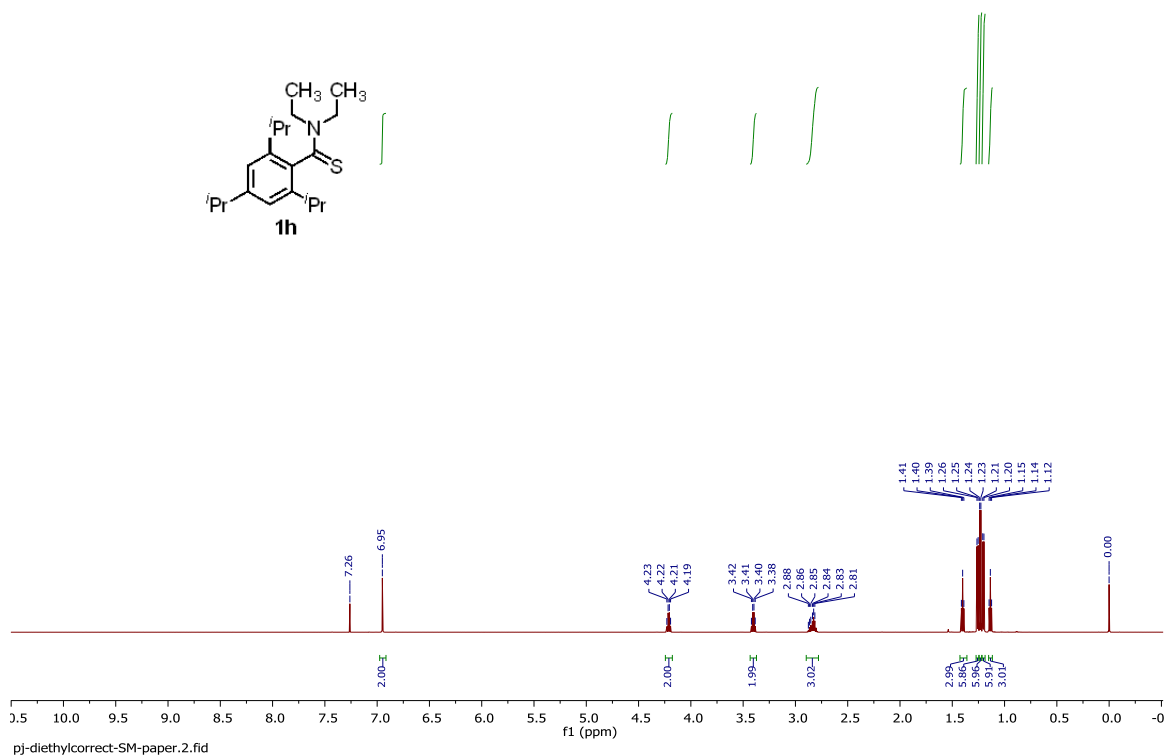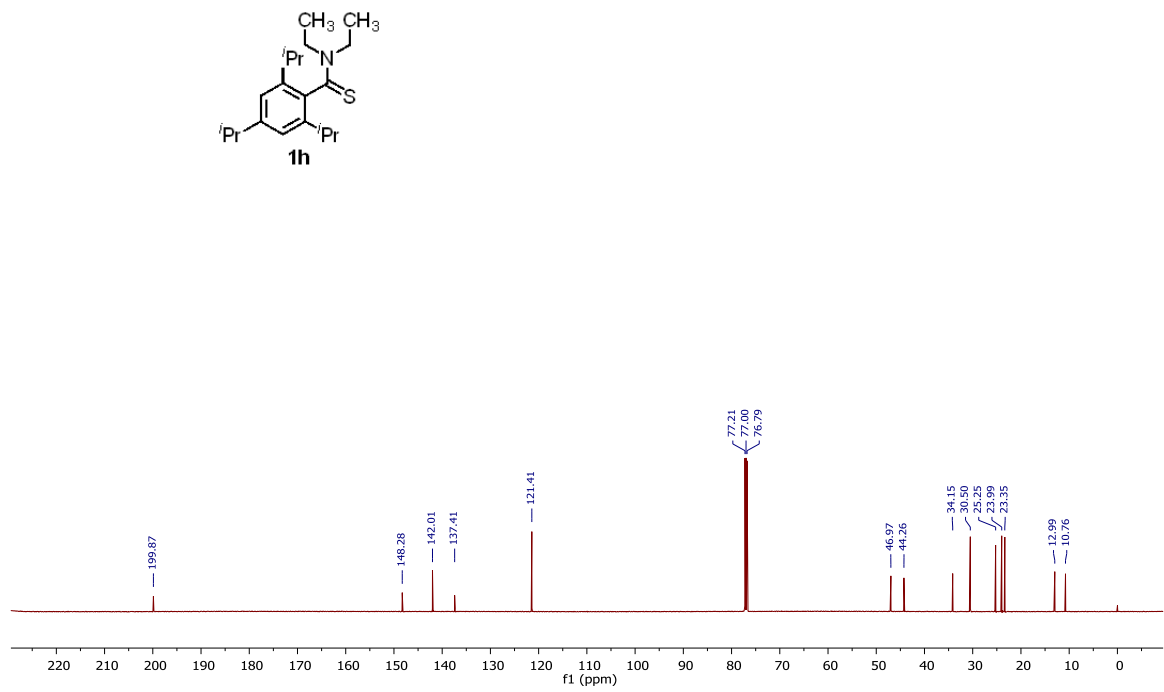

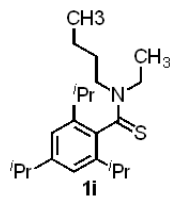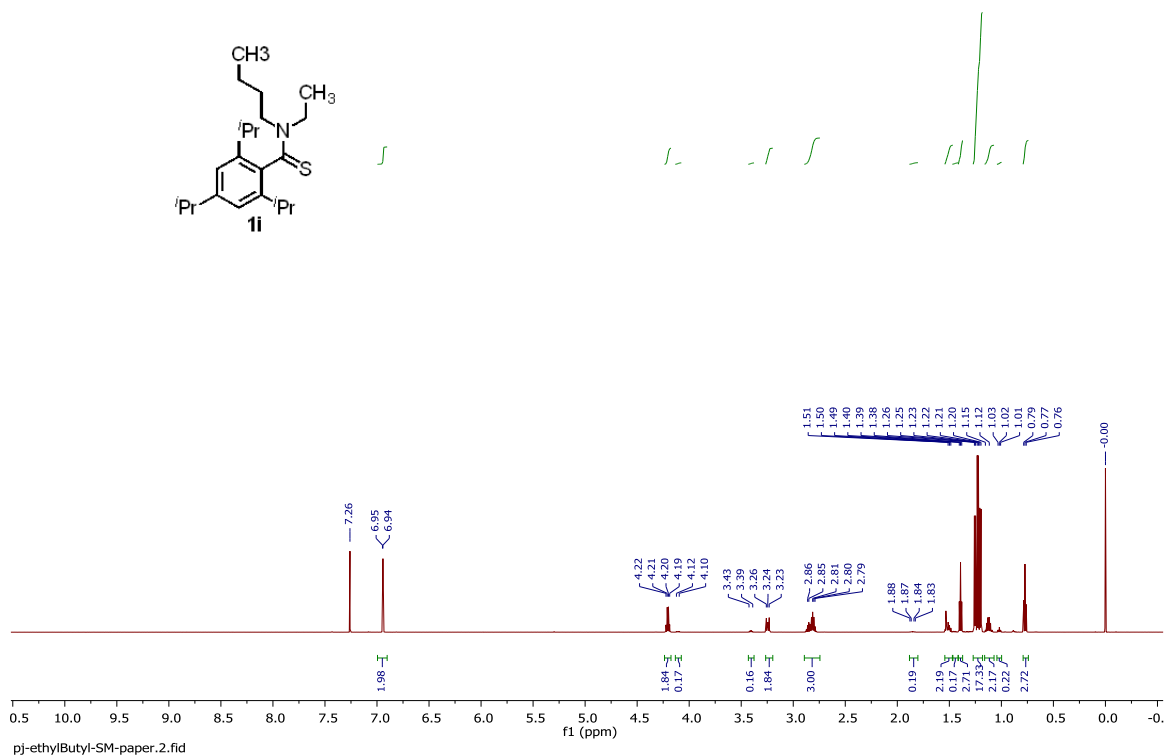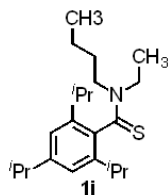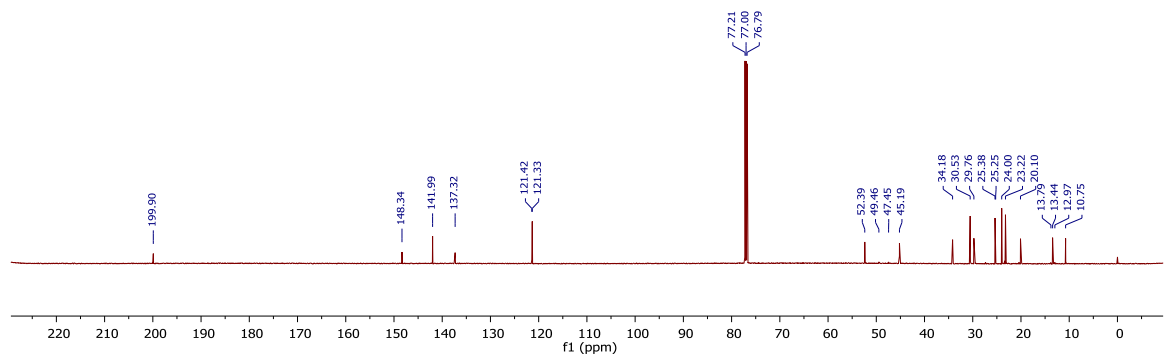



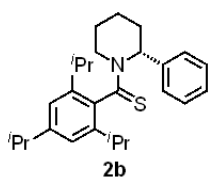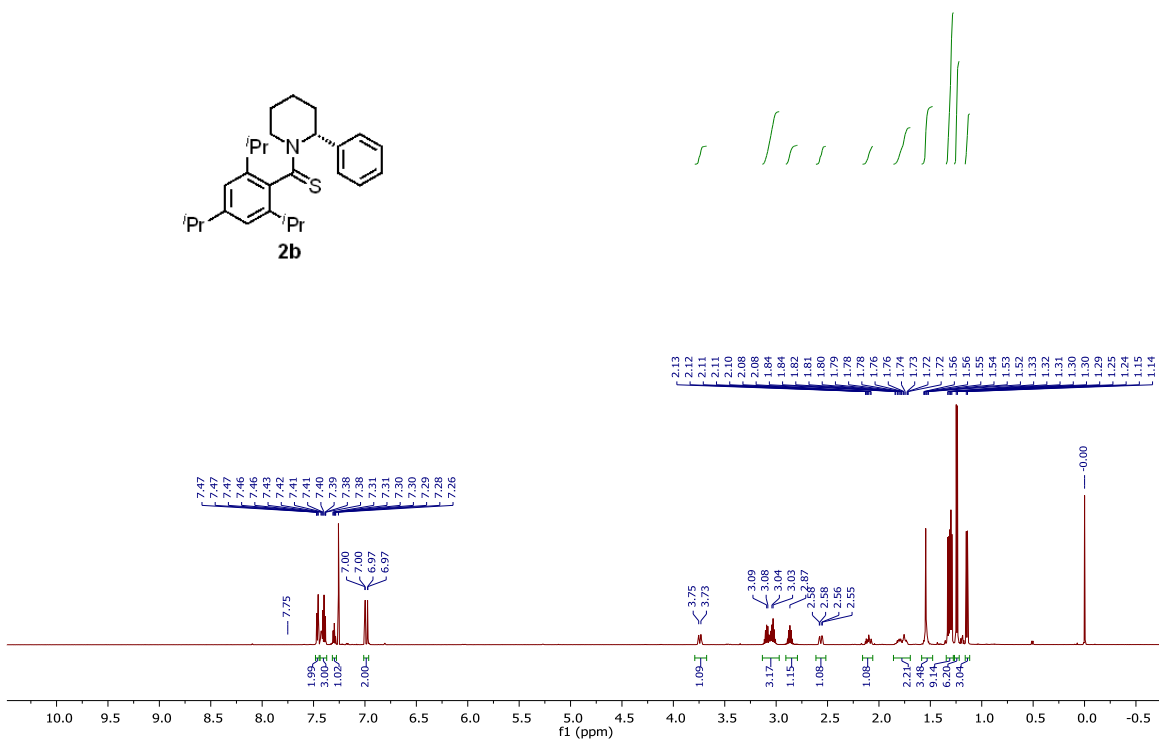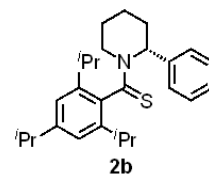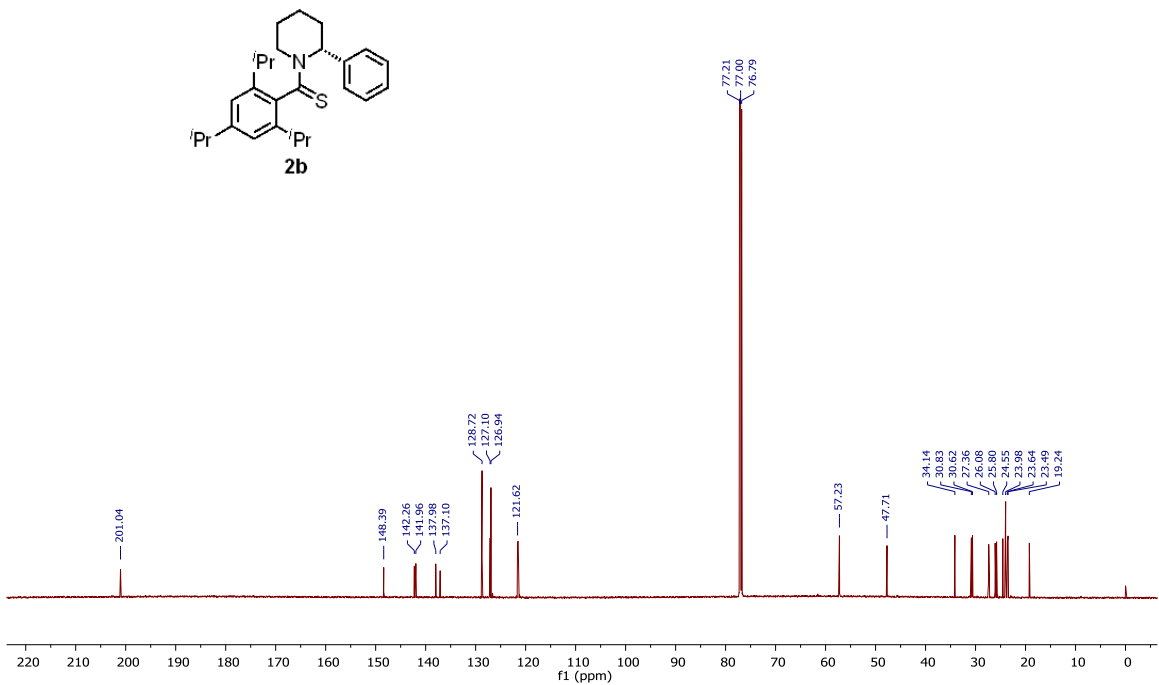



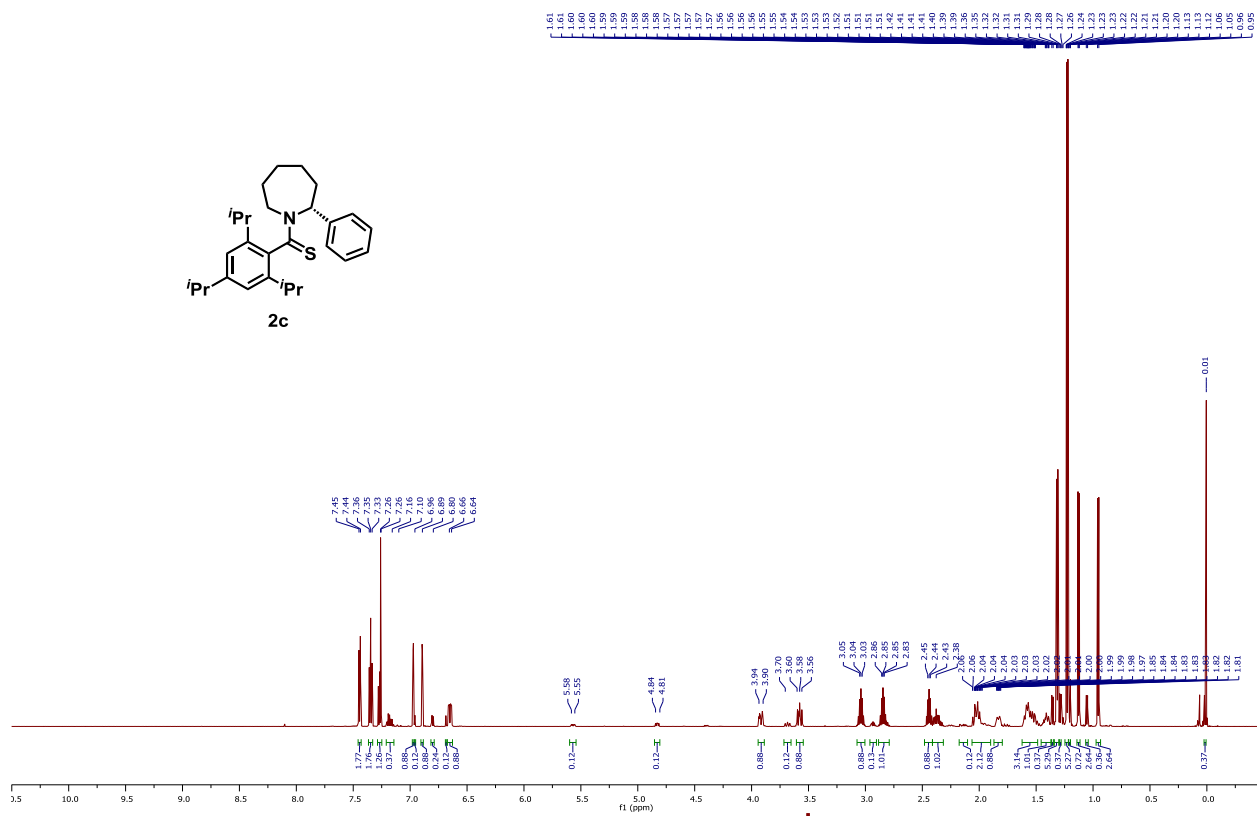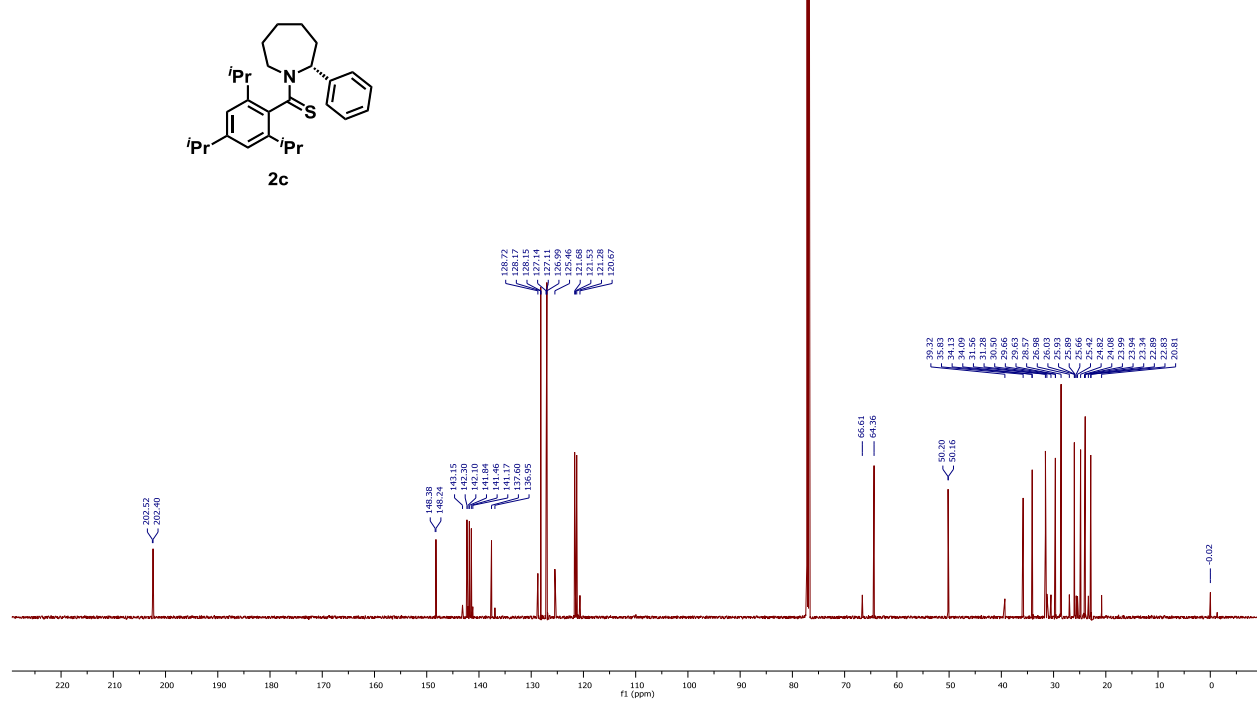



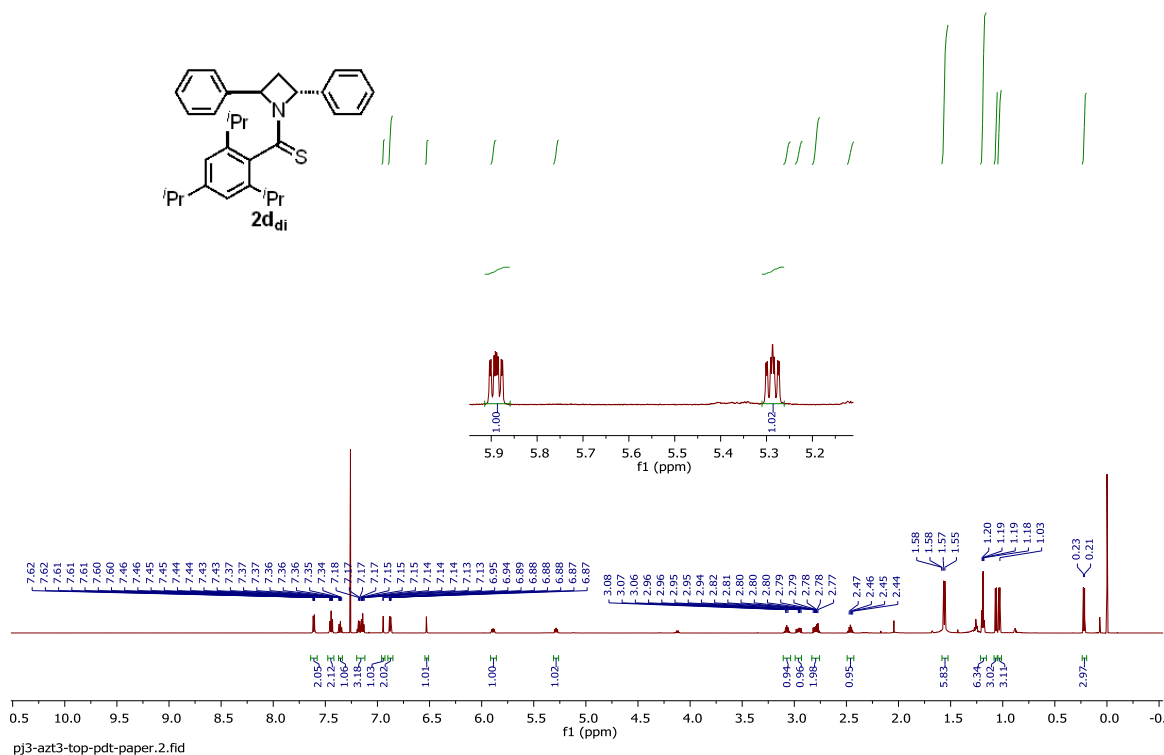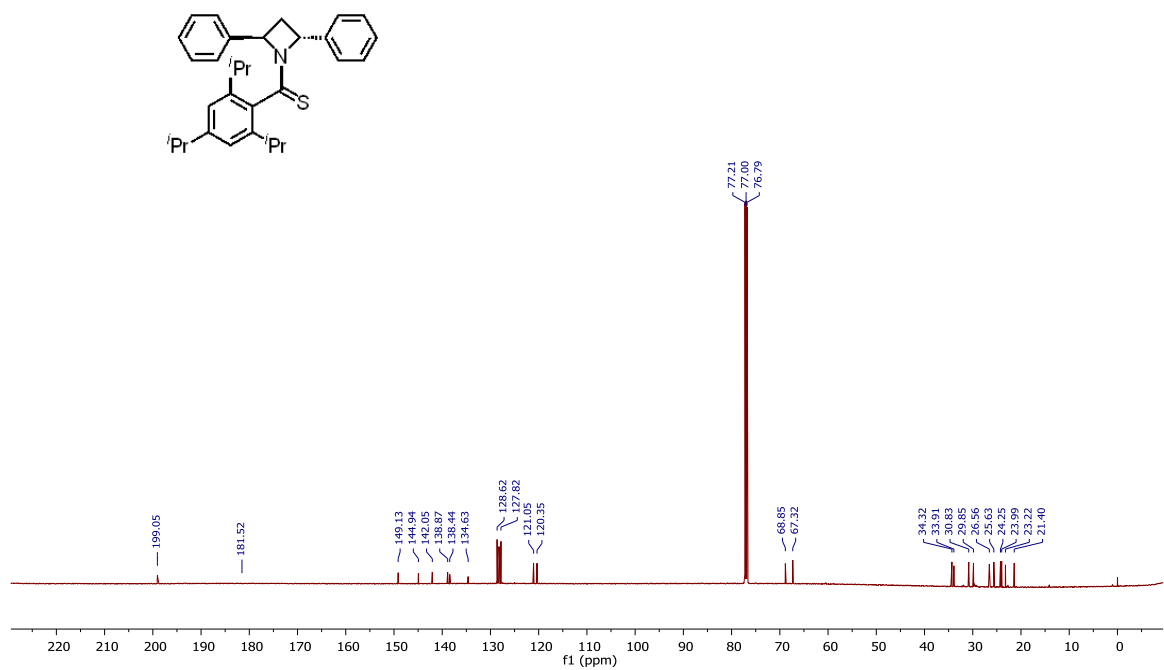

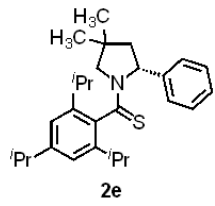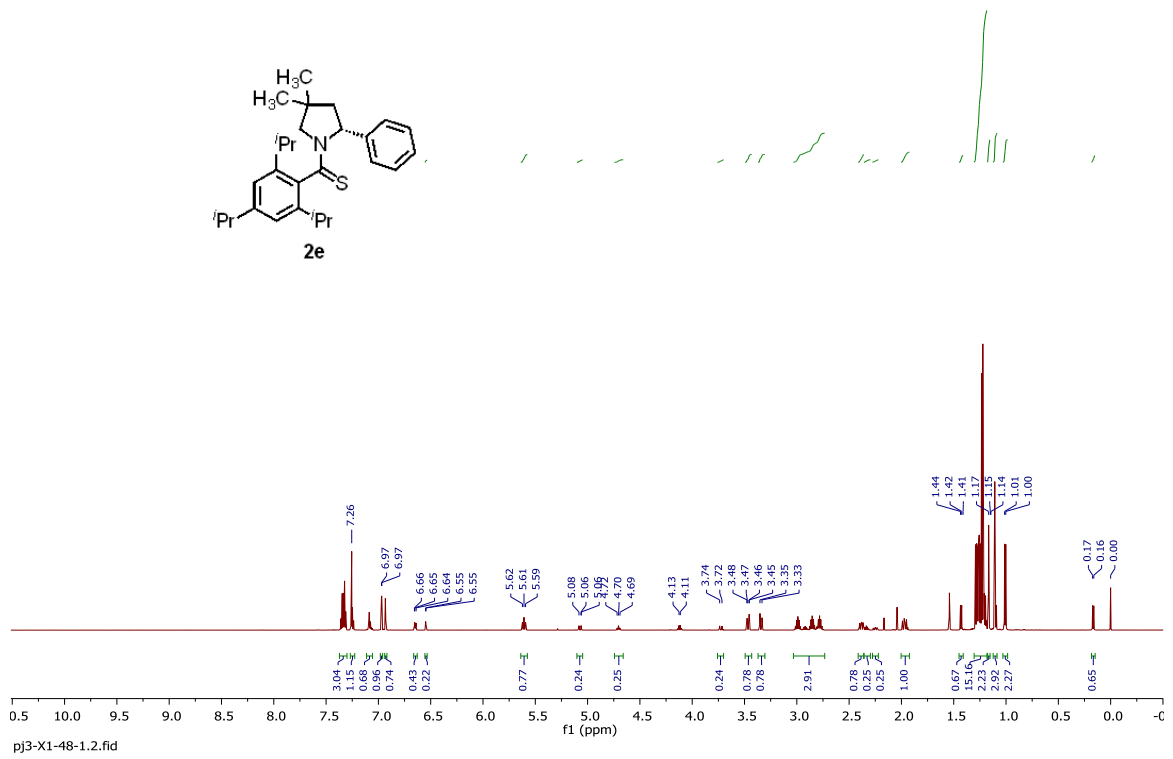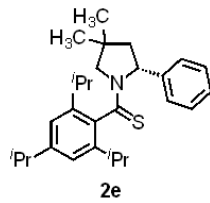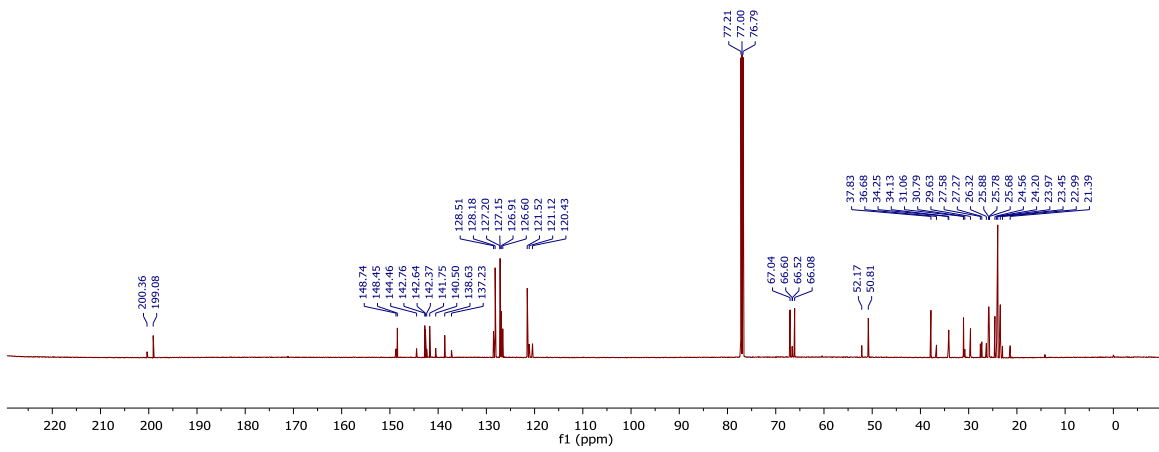

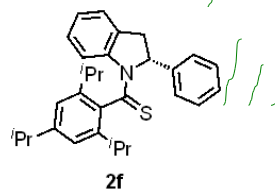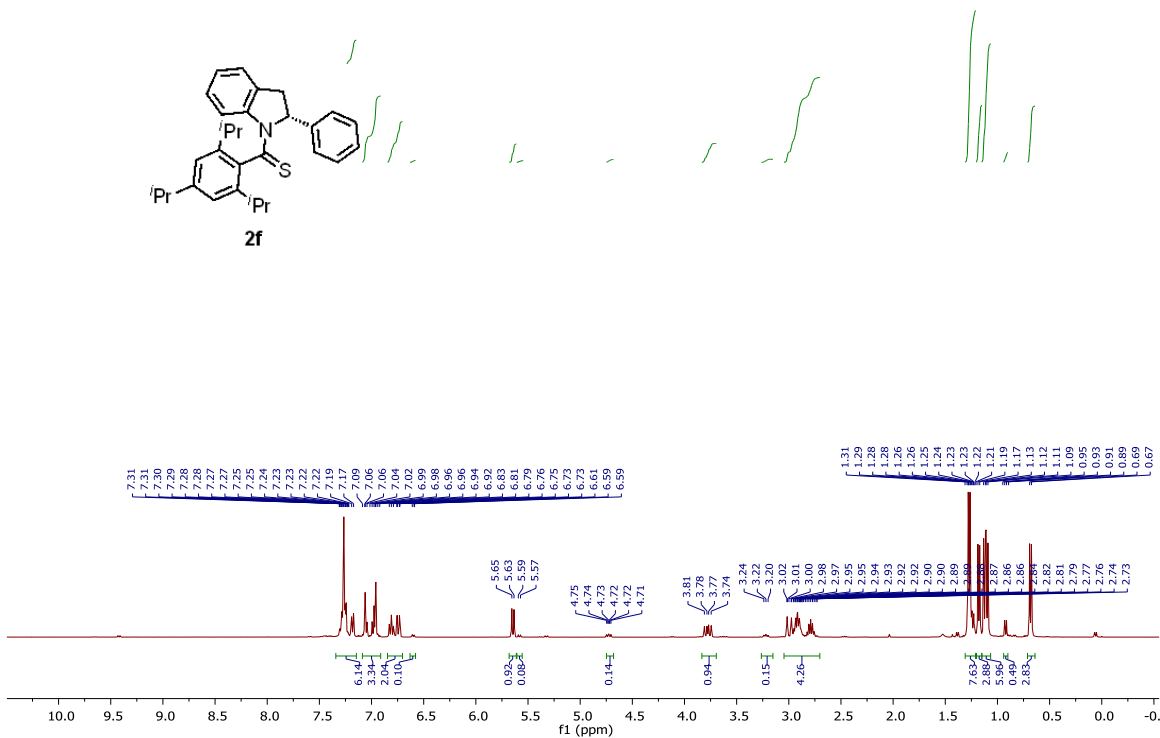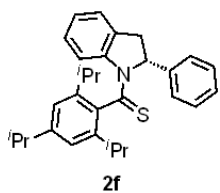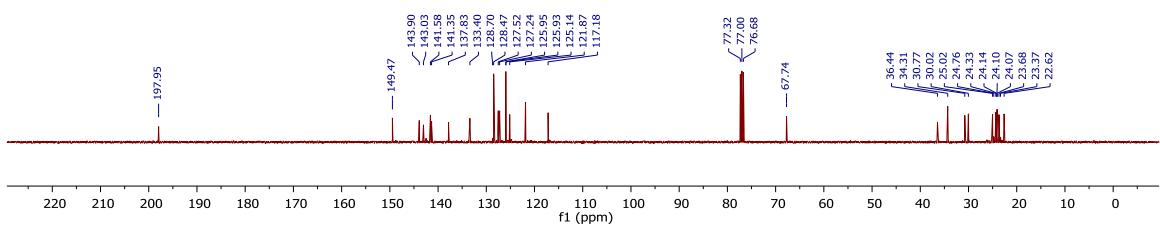

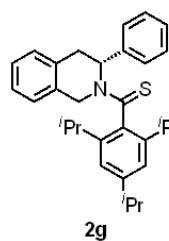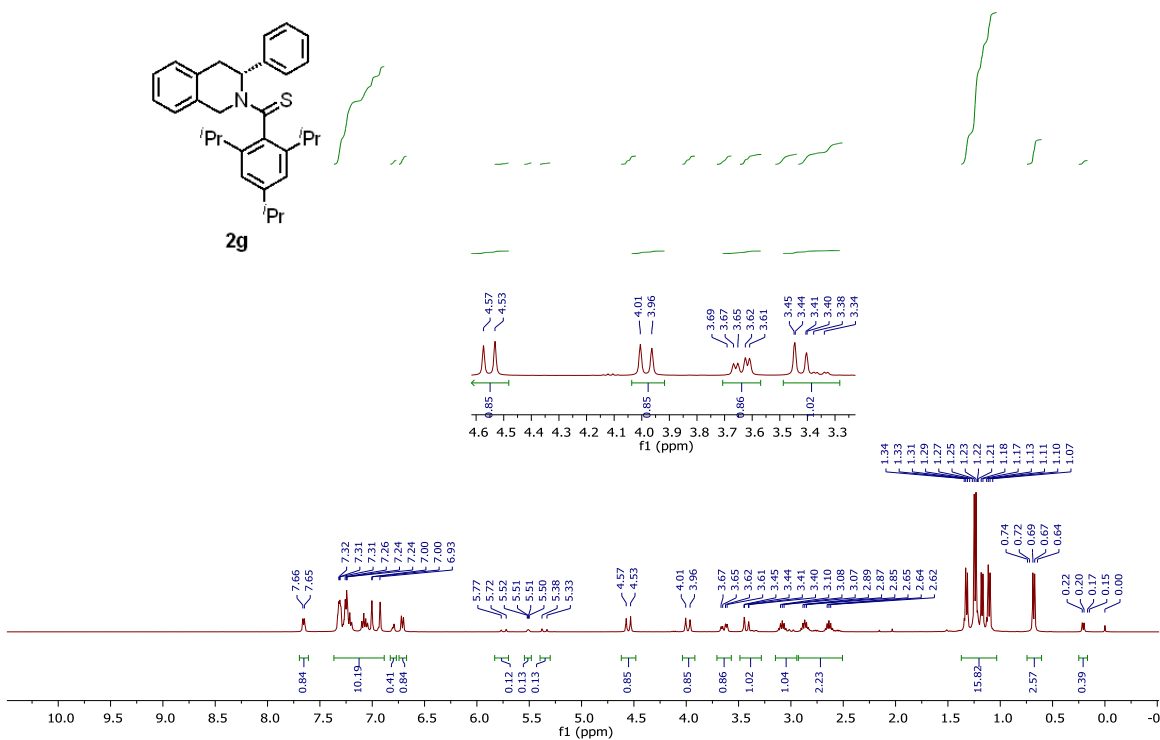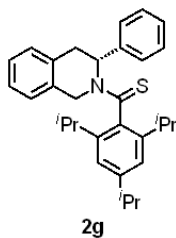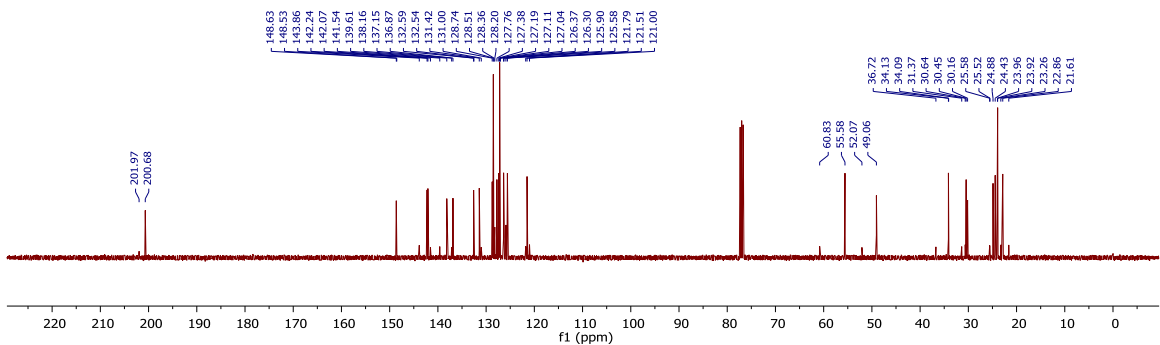







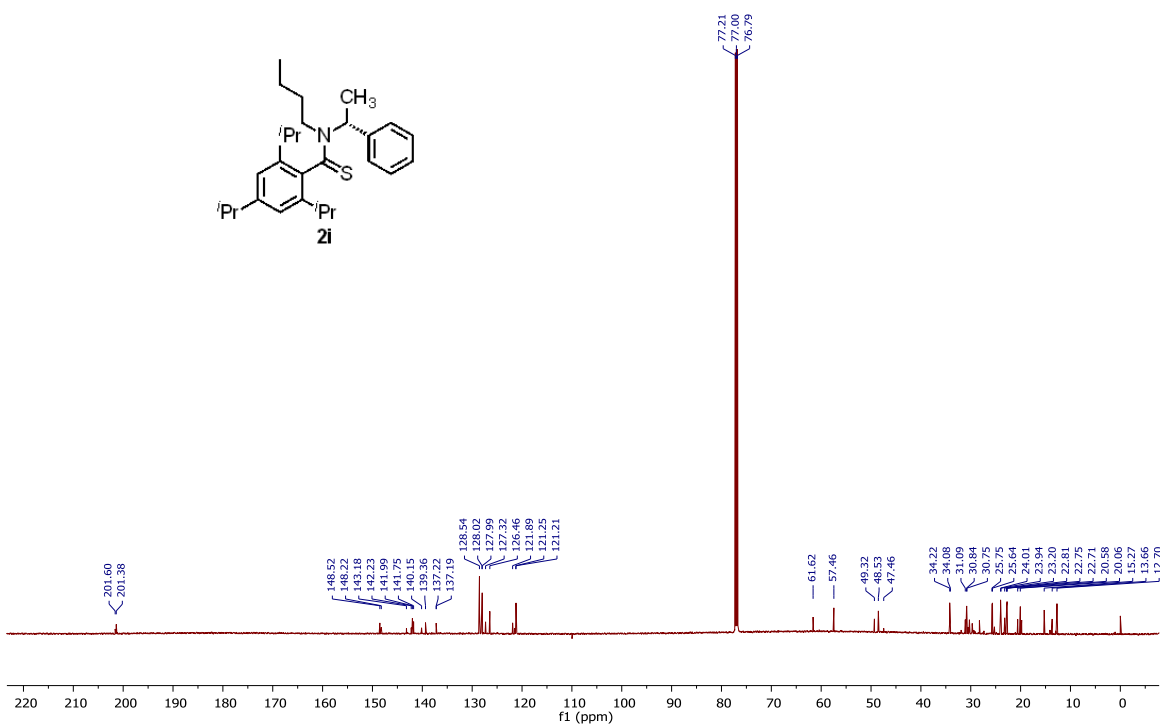





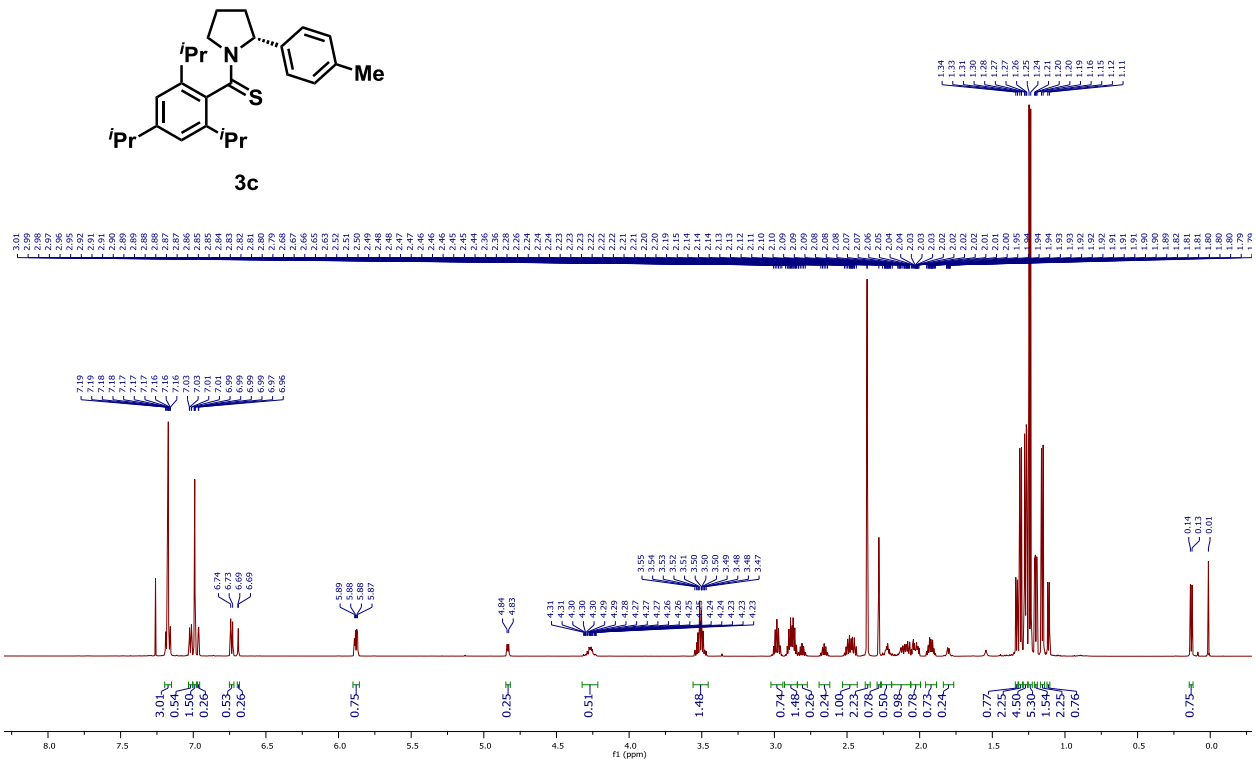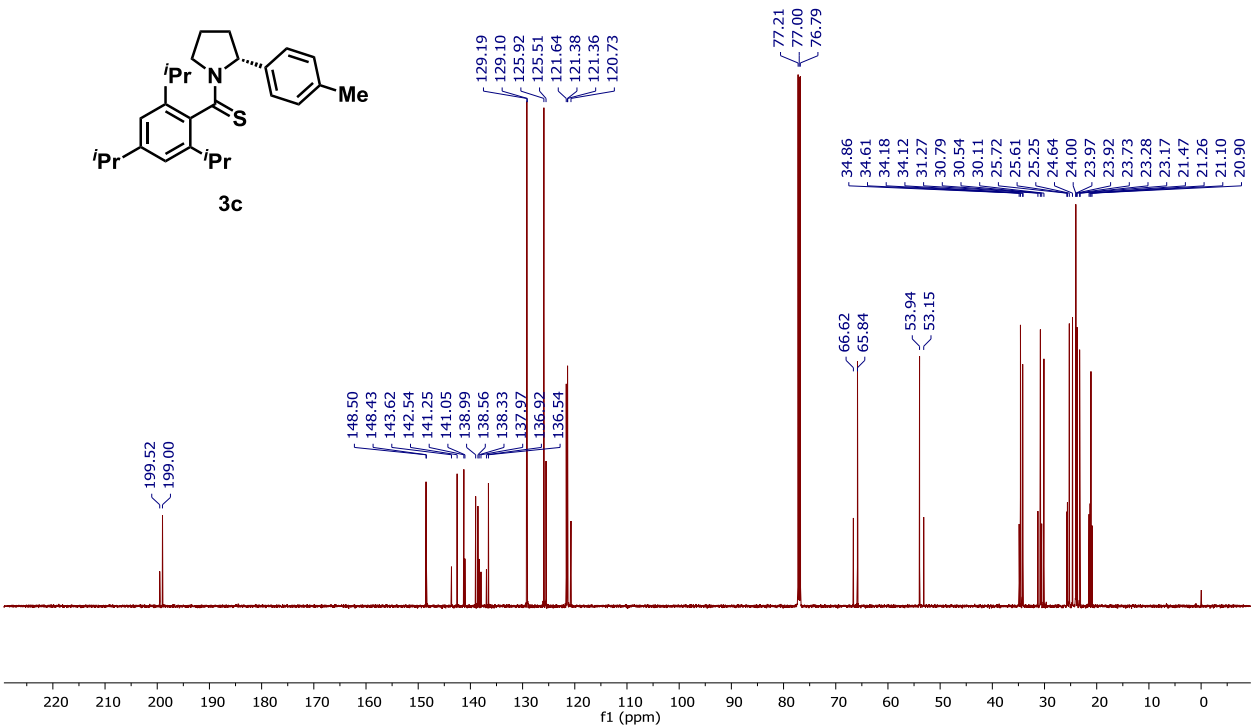

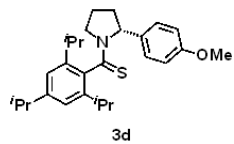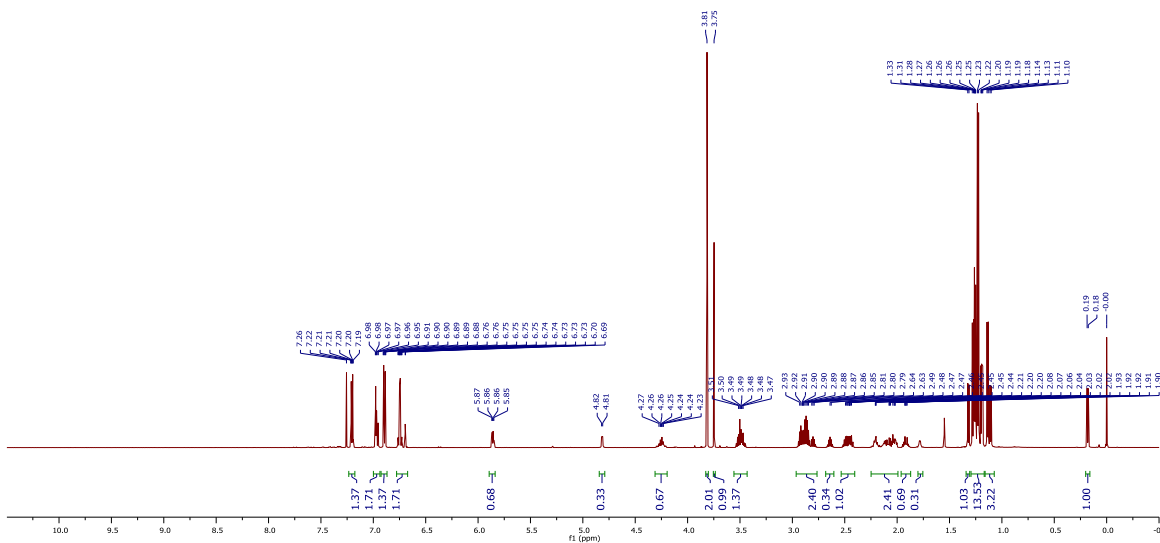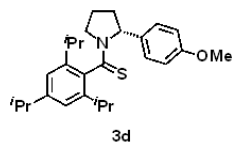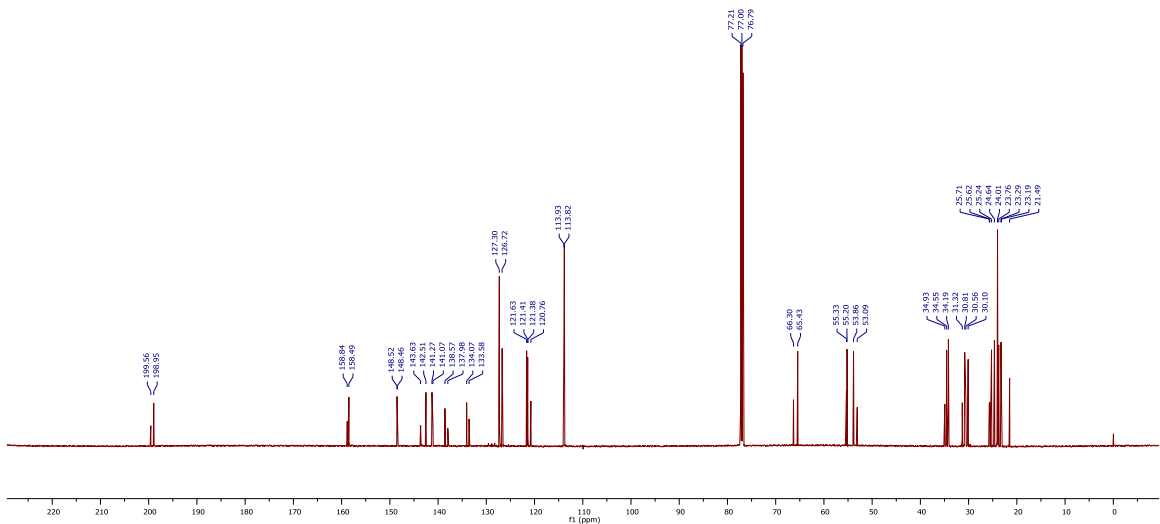

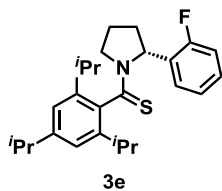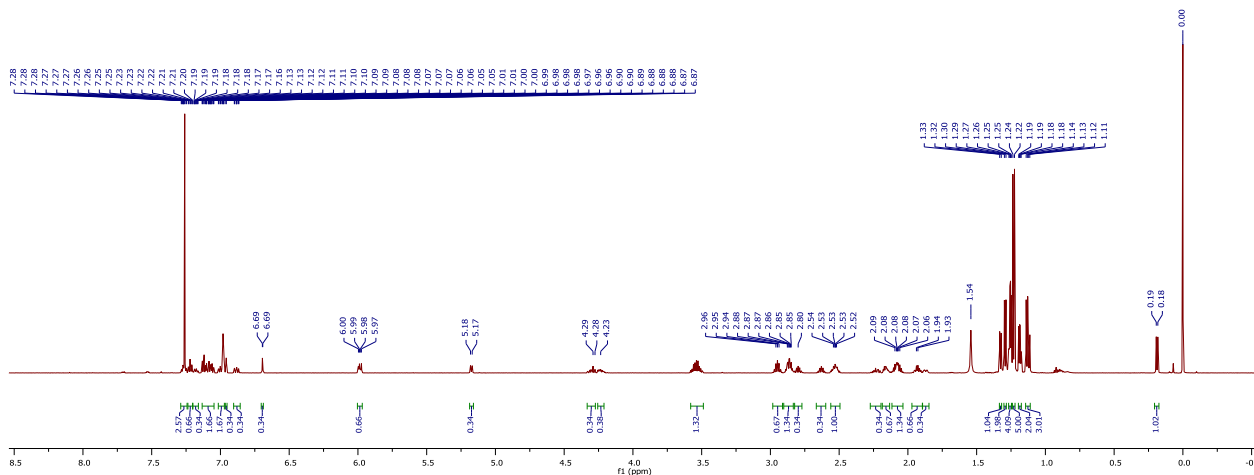



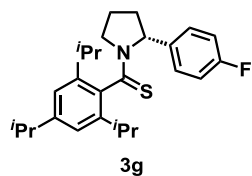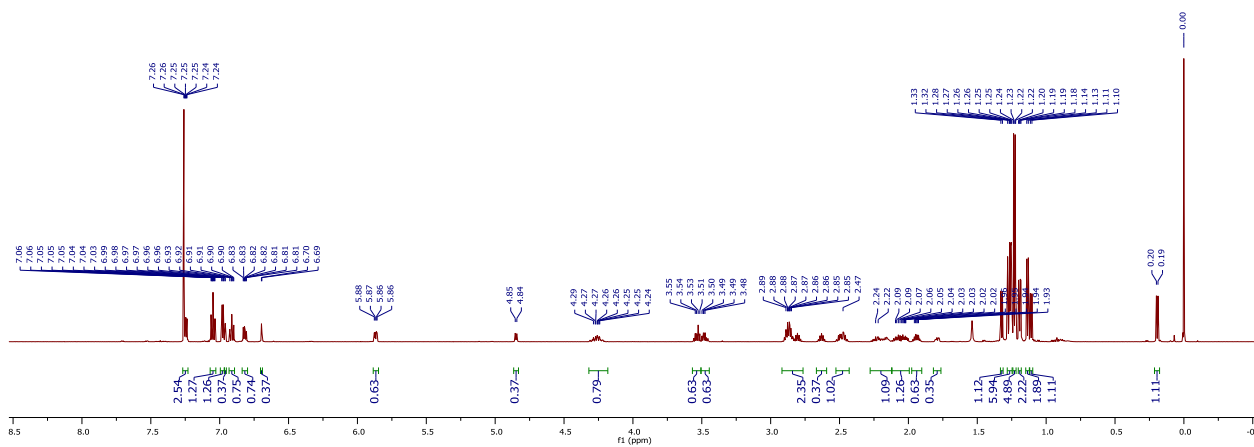





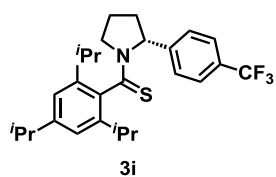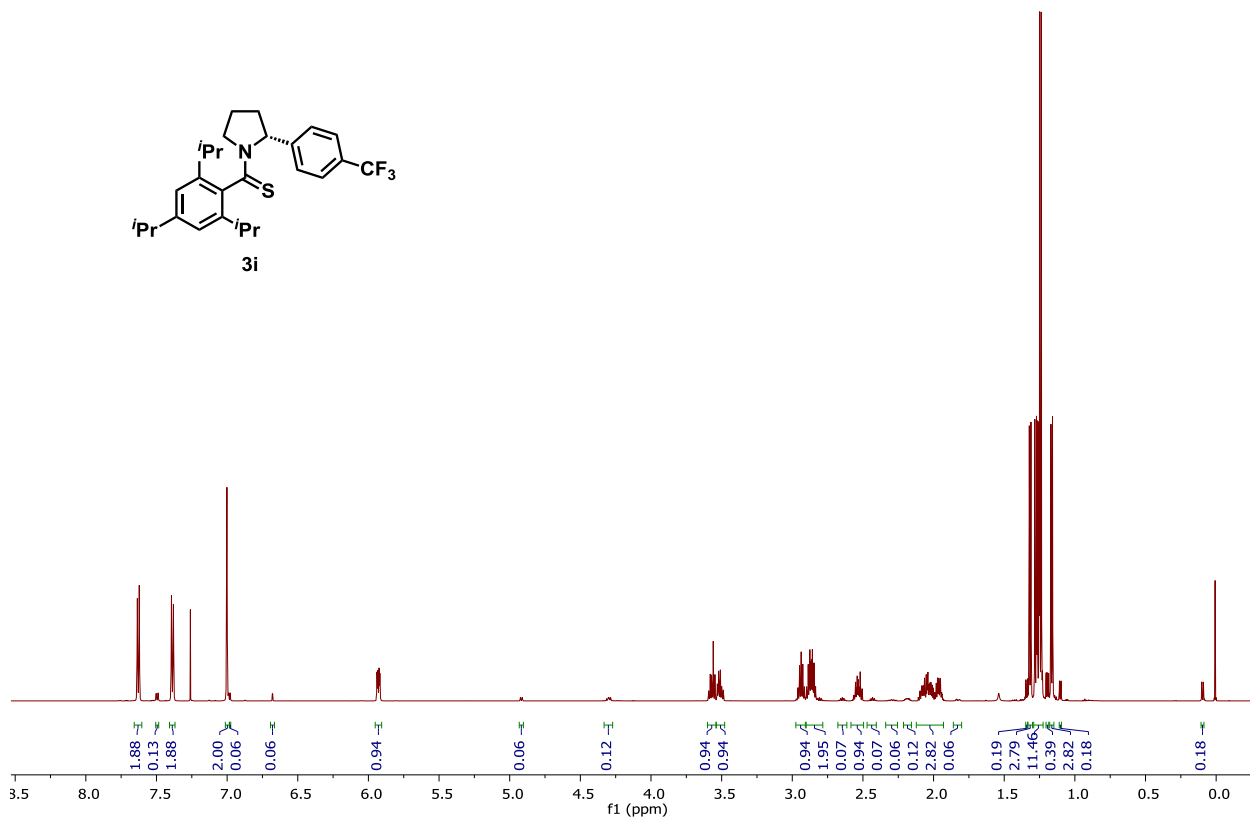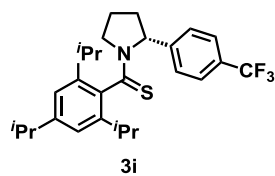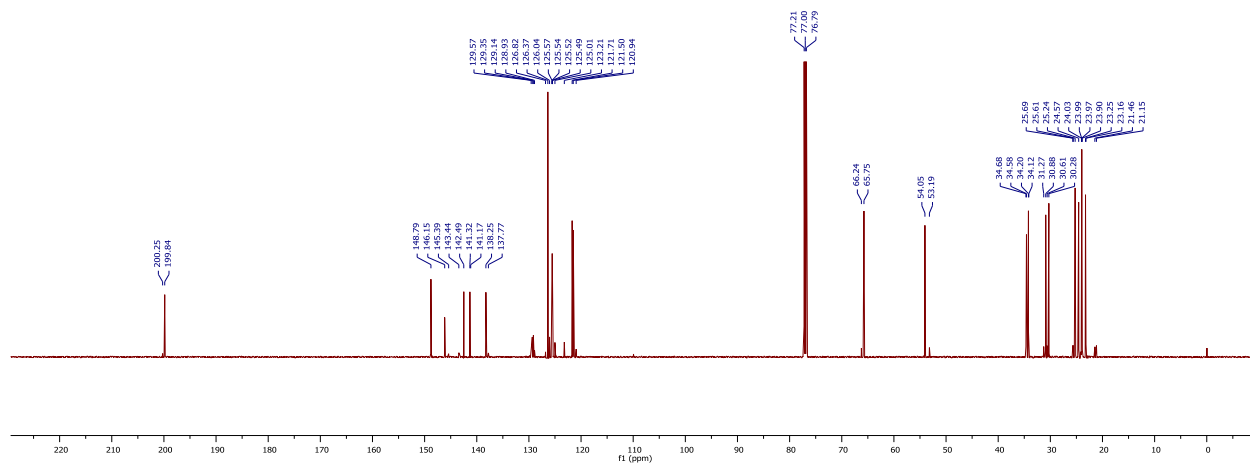









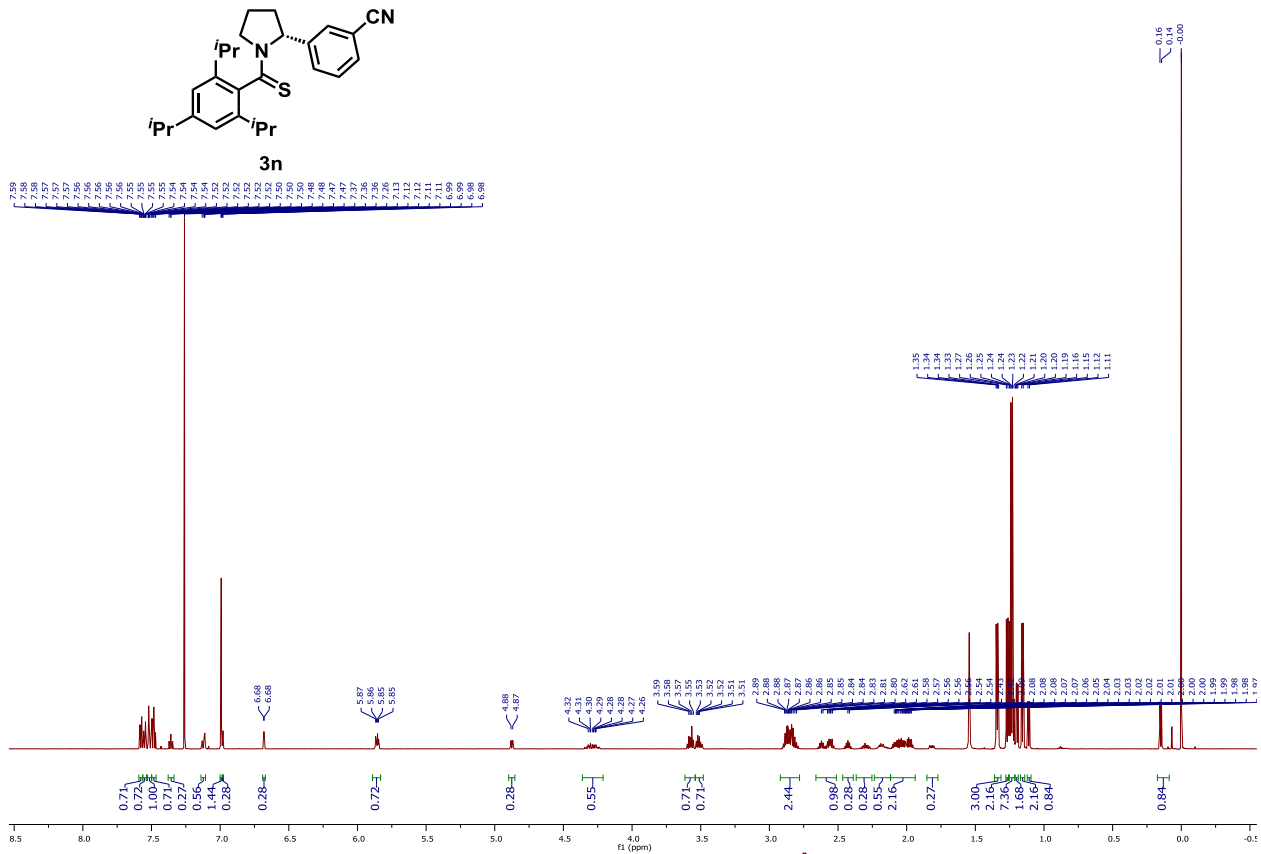







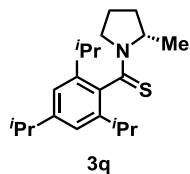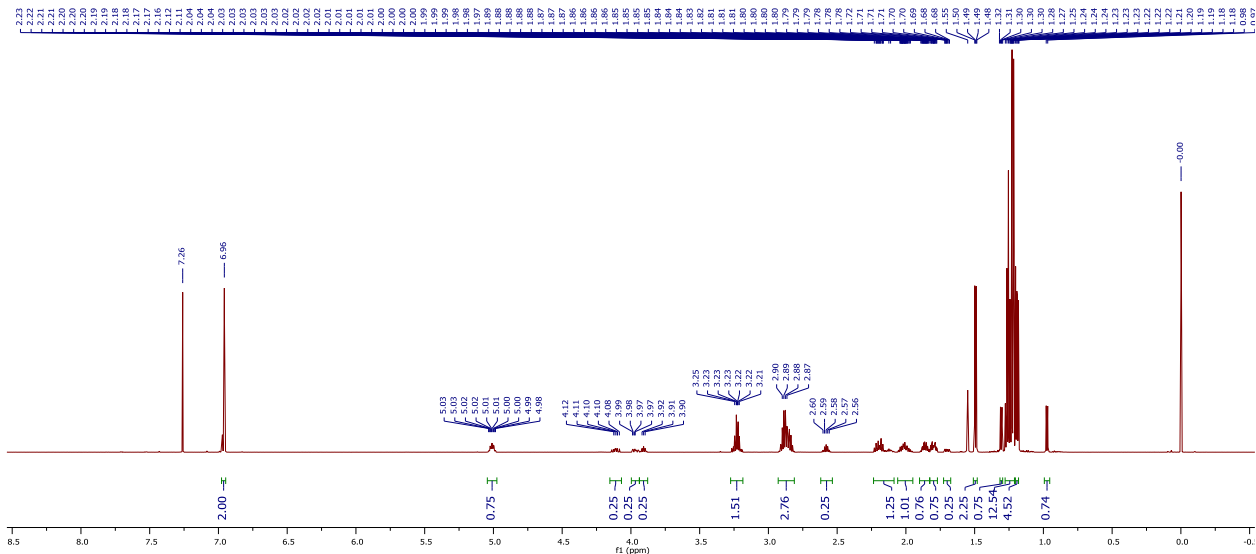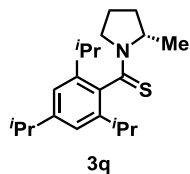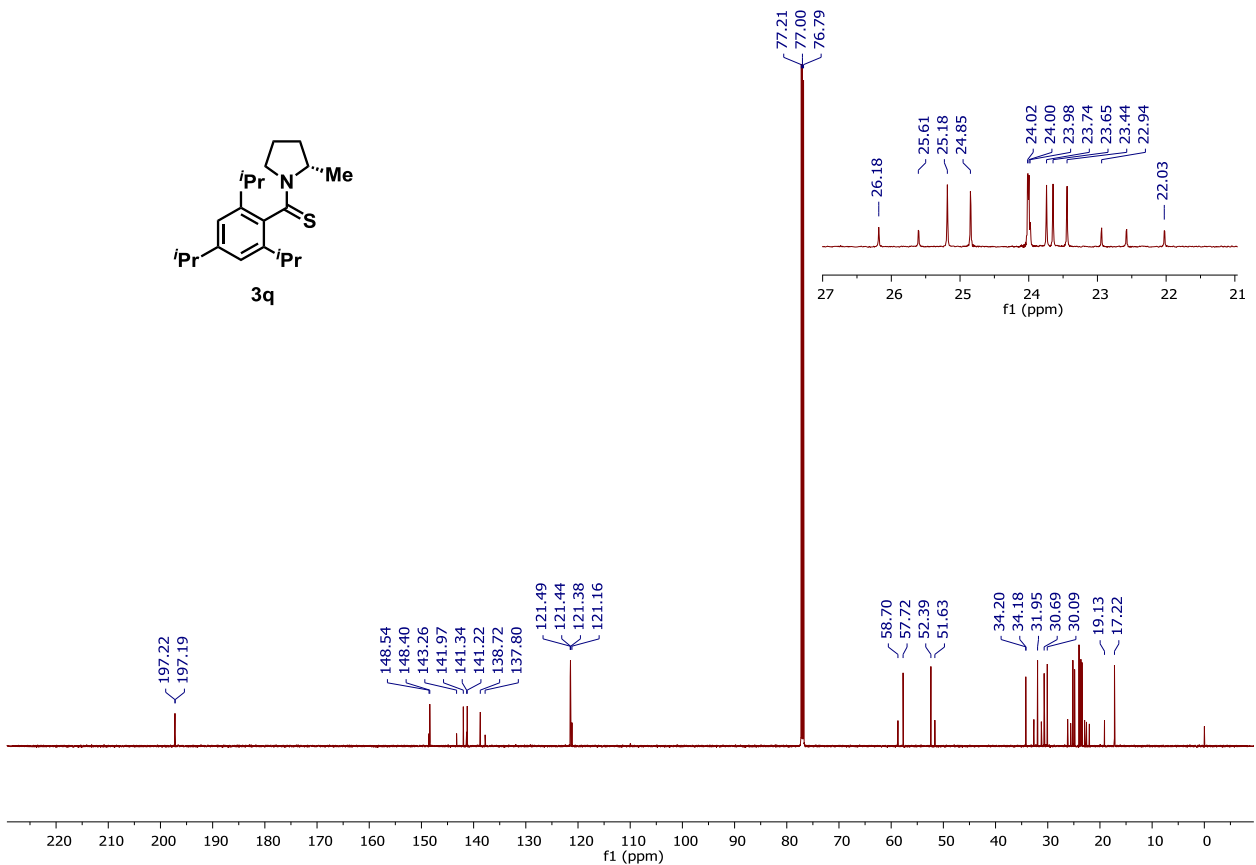

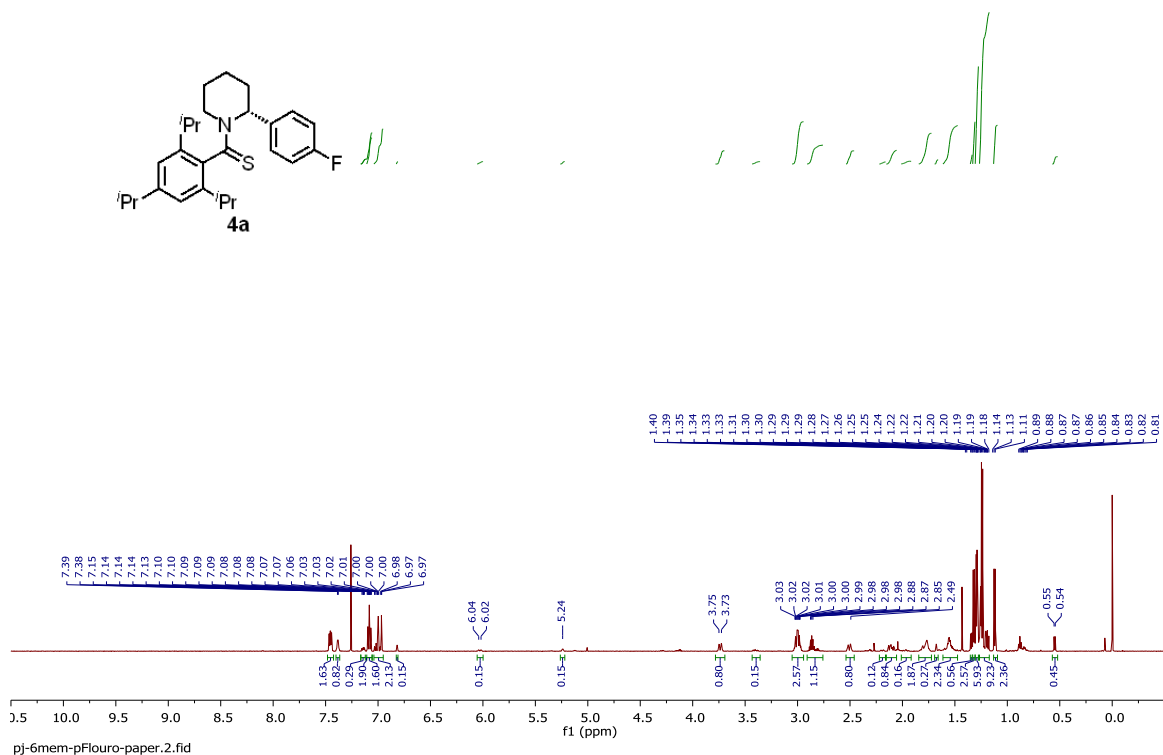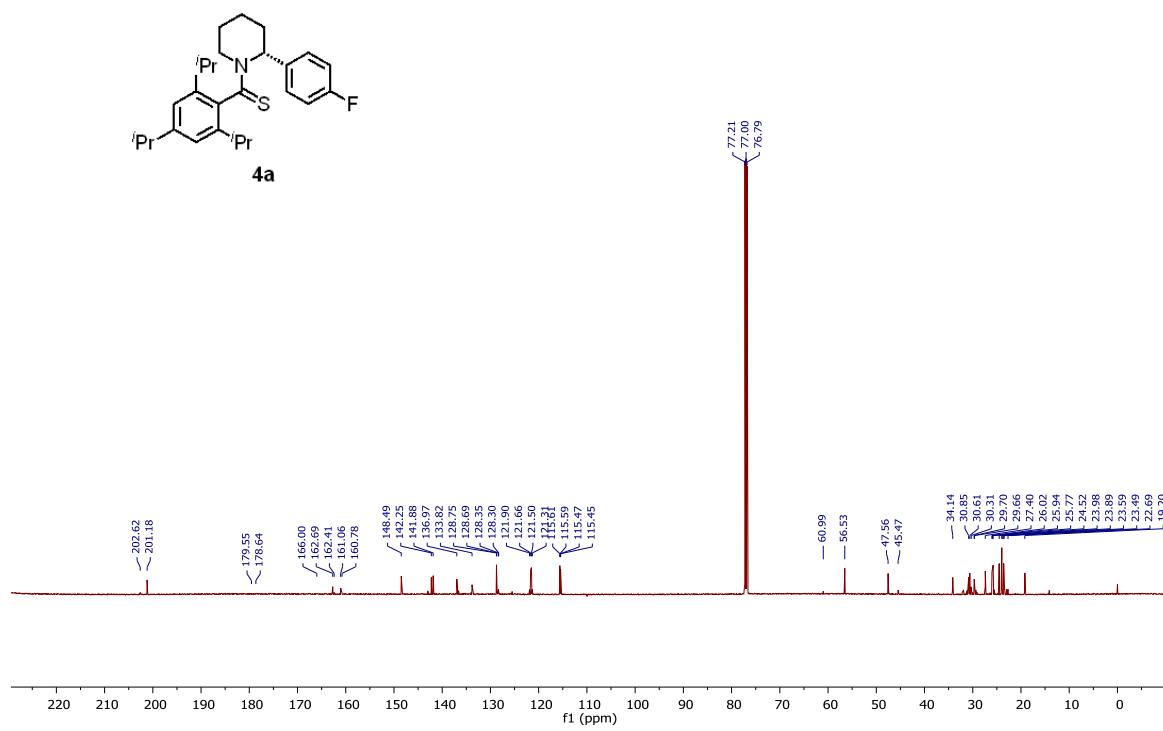

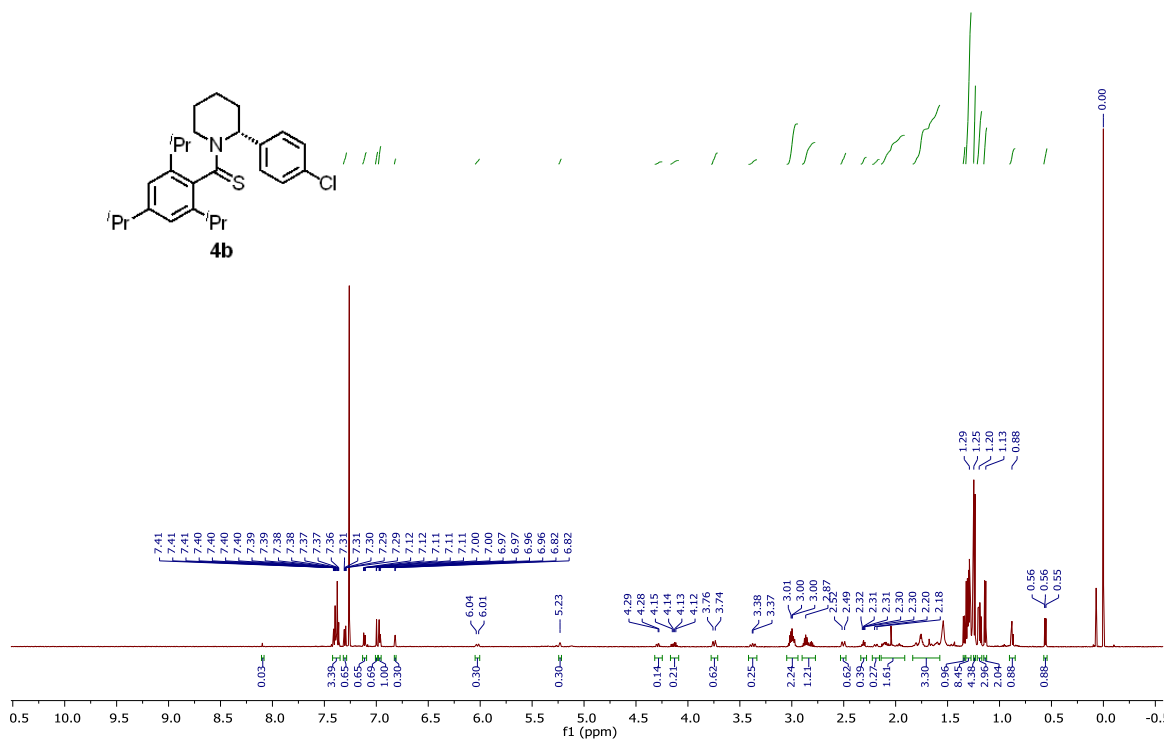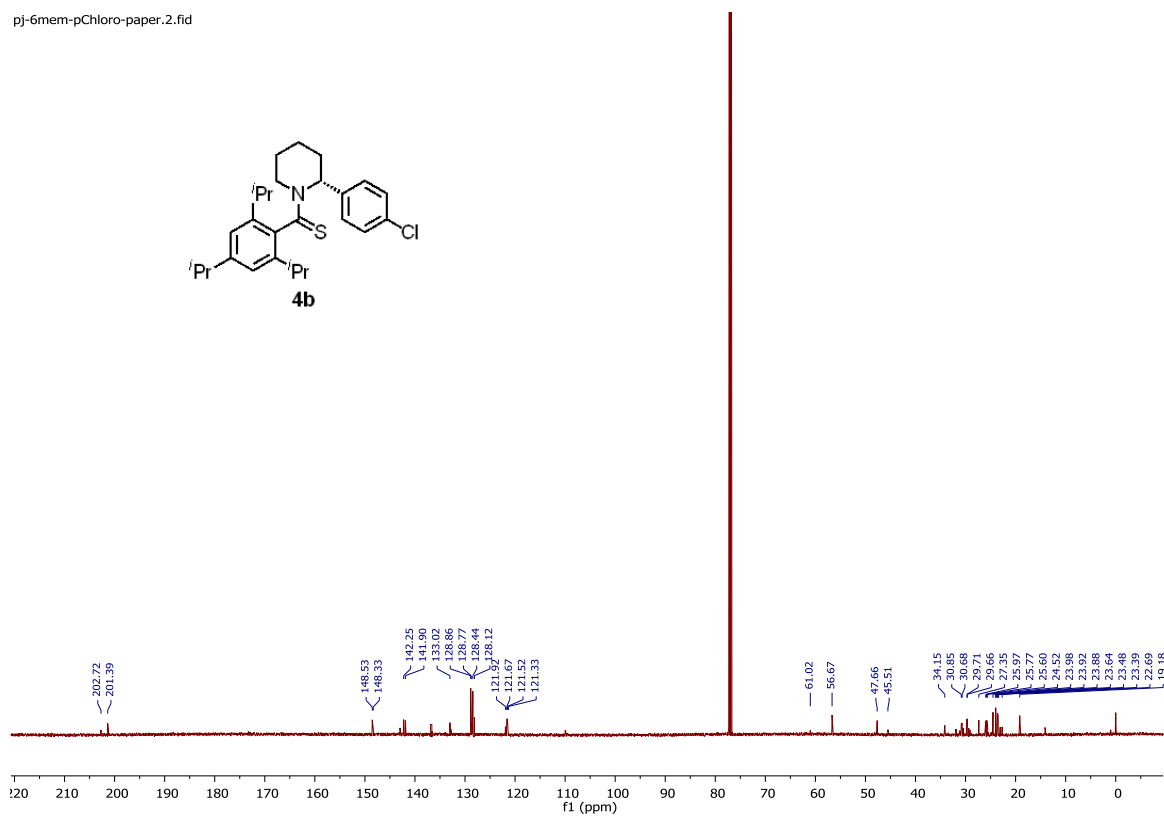

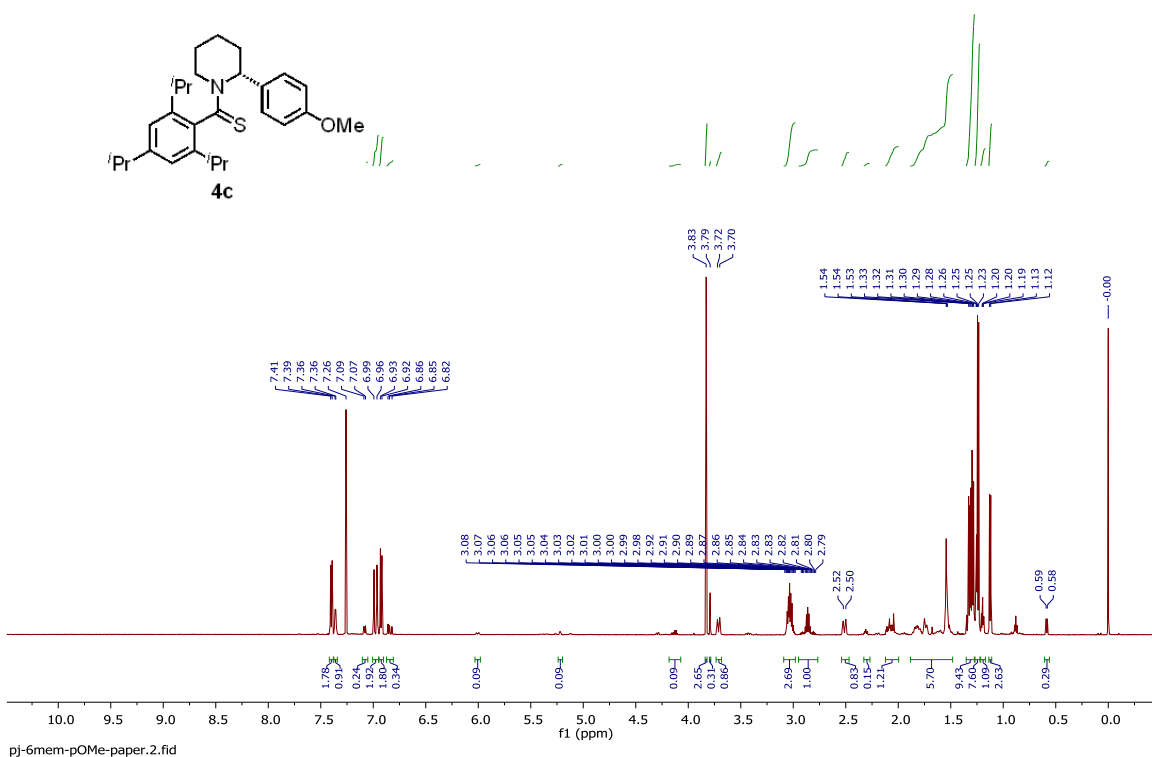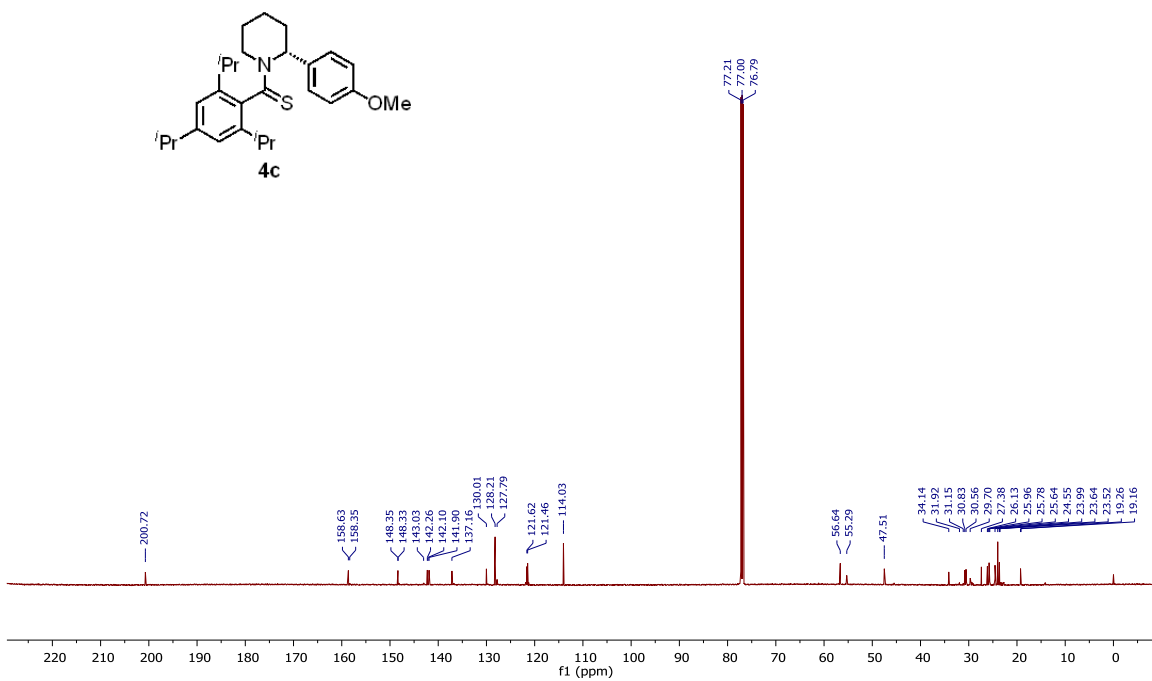

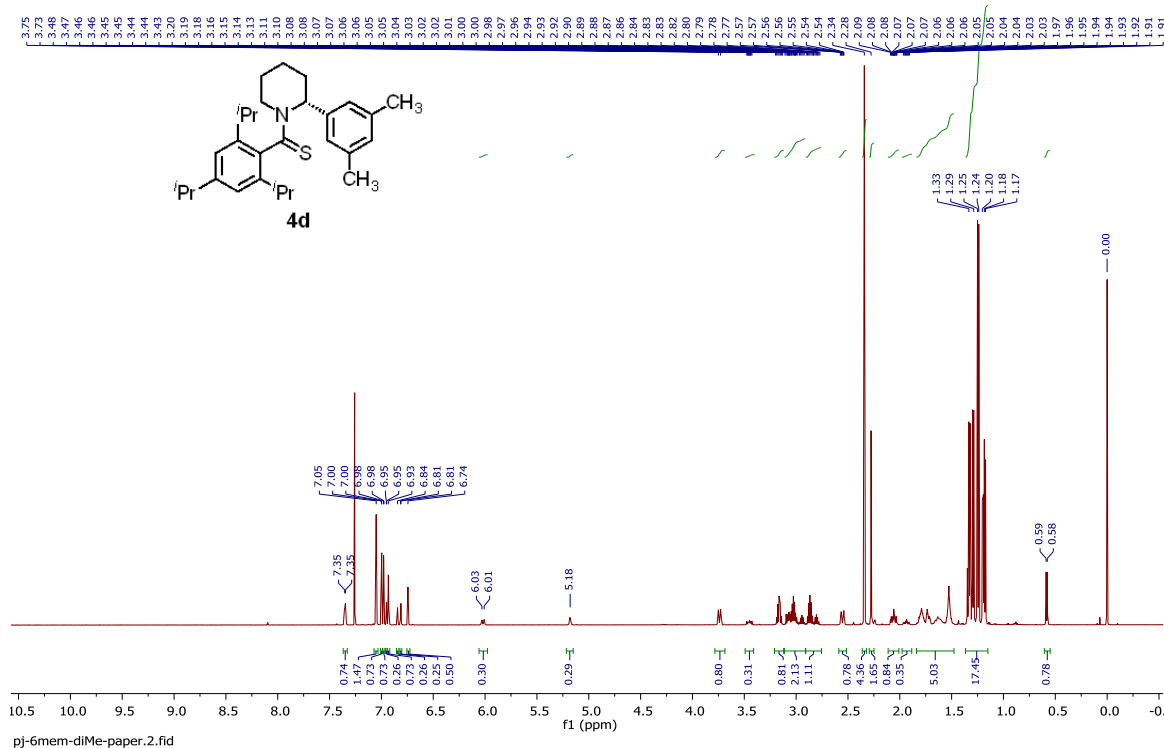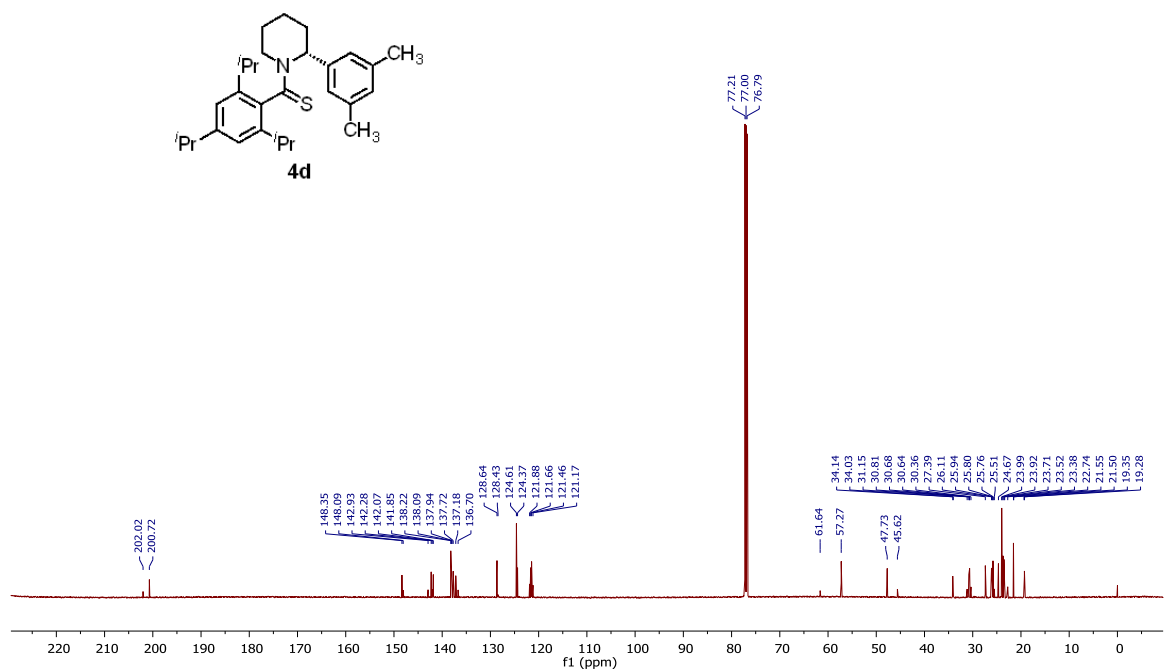

pj-dethio2-pdt-paper.1.fid

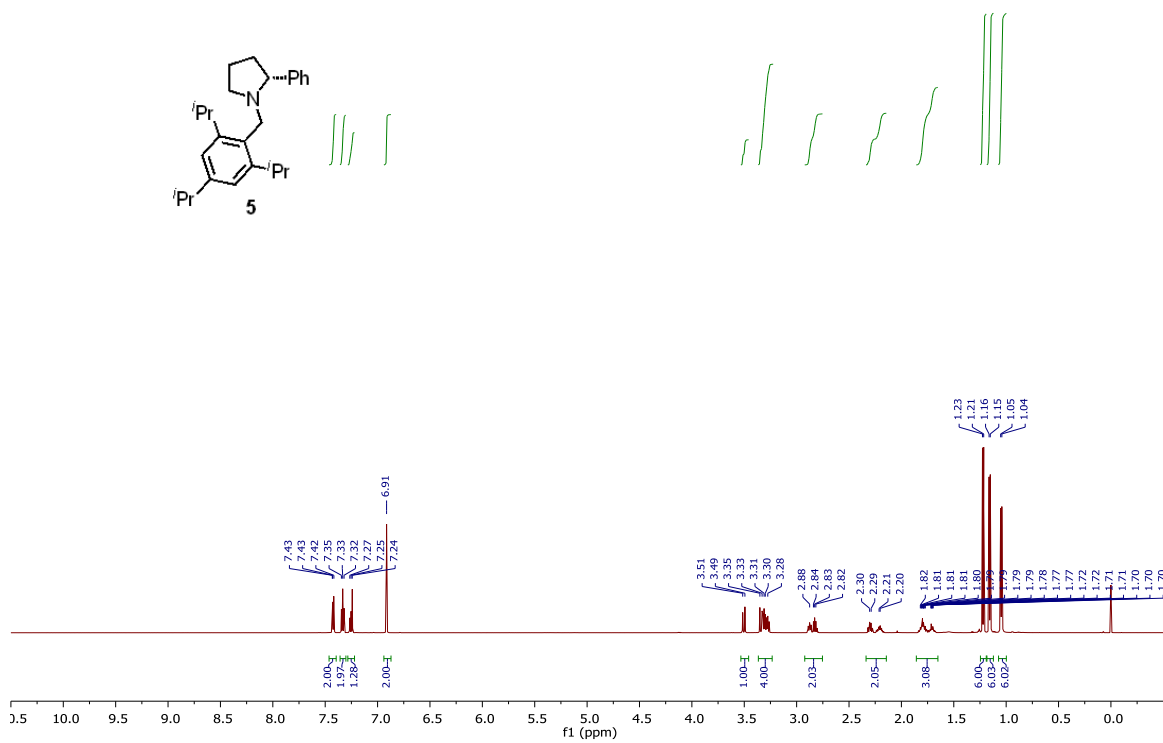

pj-dethio2-pdt-paper.2.fid

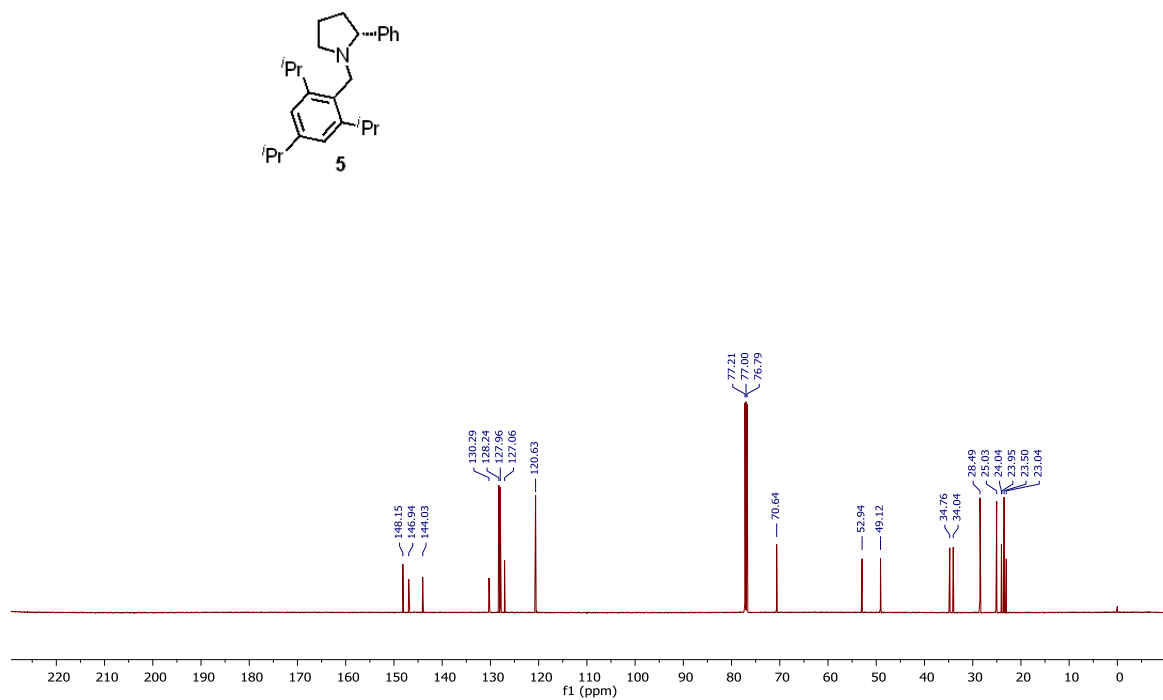

pj3-BOCpyrrolidine-pdt-paper.1.fid

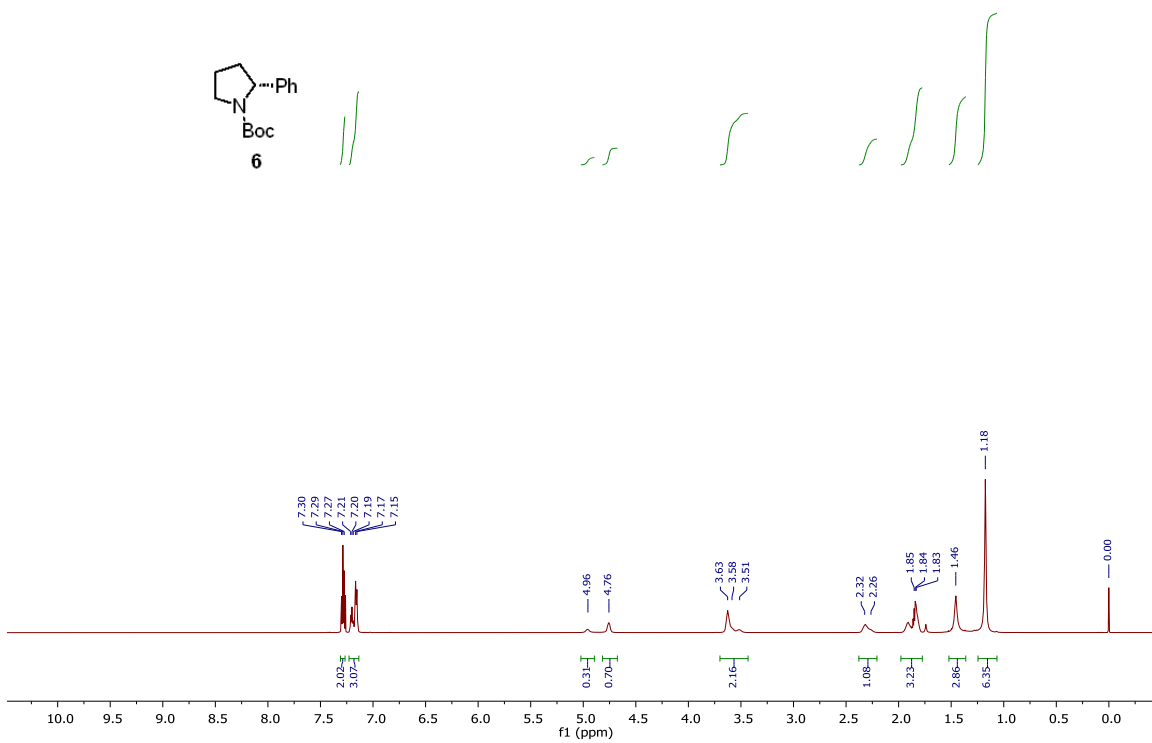

pj3-BOCpyrrolidine-pdt-paper.2.fid

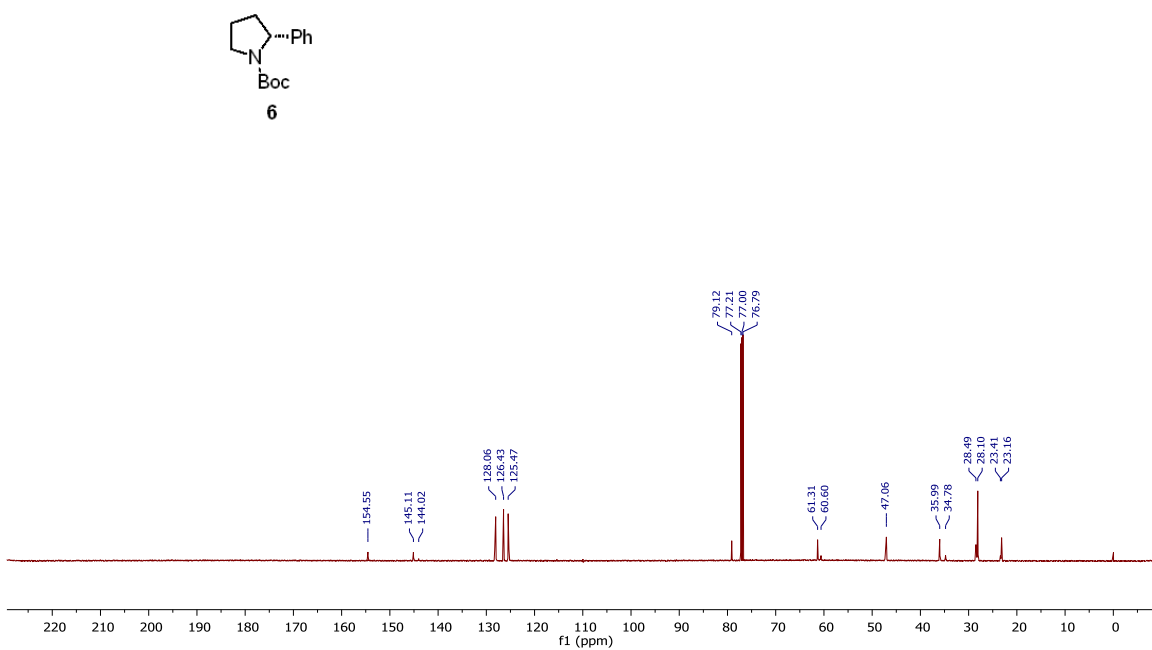



pj3-dethio-dimethyl.1.fid

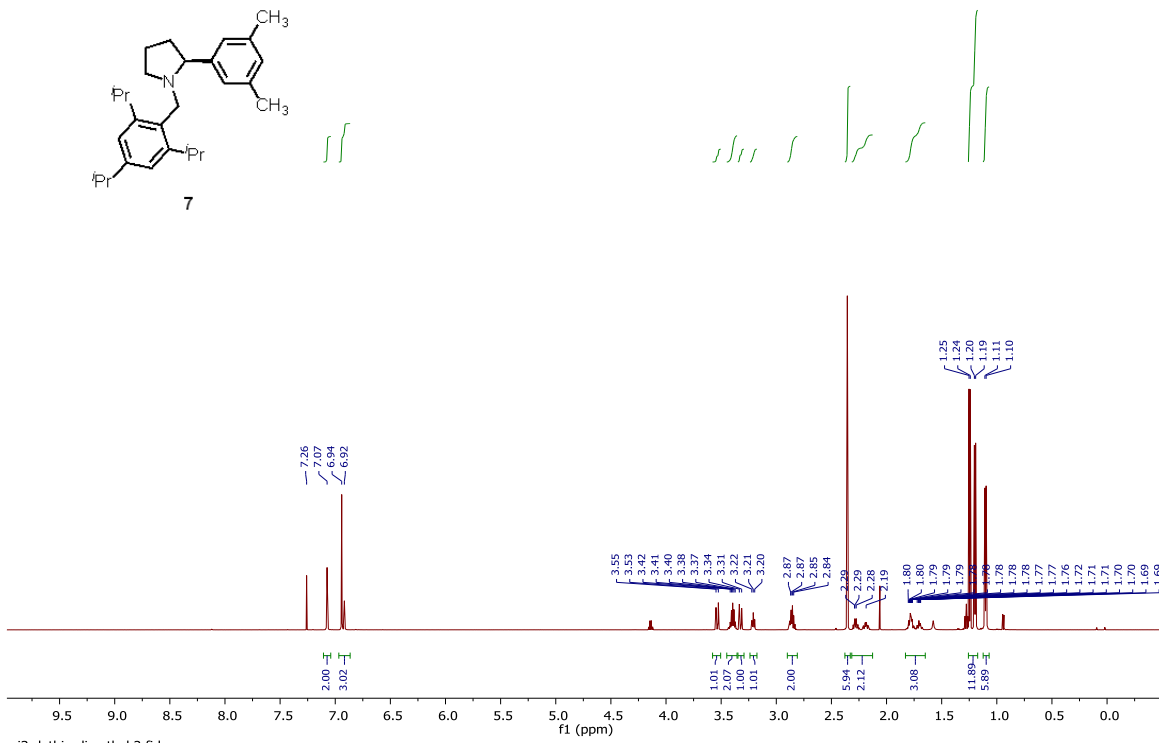

pj3-dethio-dimethyl.2.fid

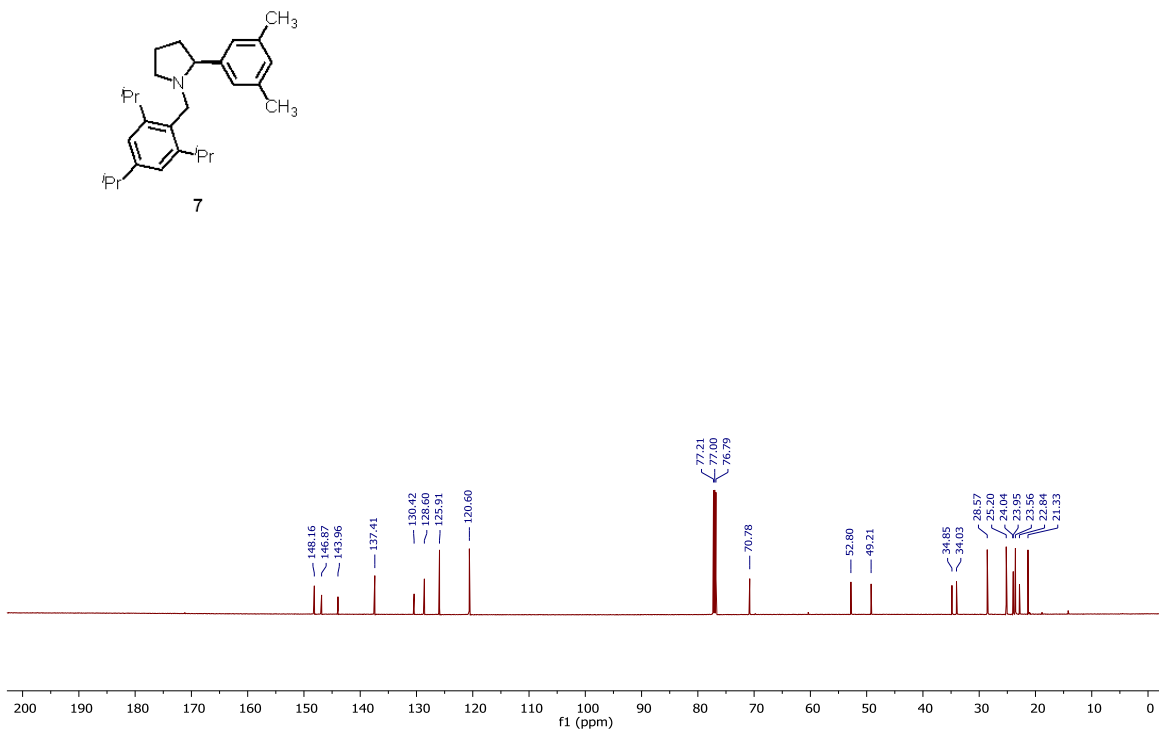

pj3-119-dimethyl-BOC.1.fid

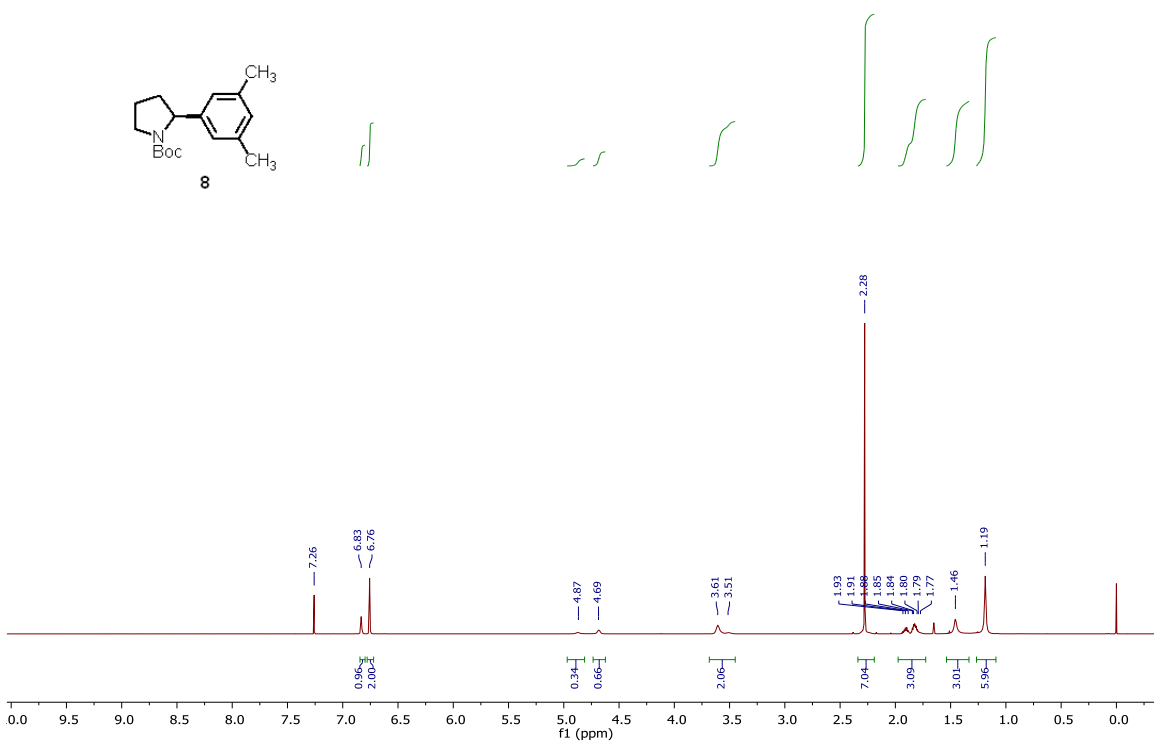

pj3-119-dimethyl-BOC.2.fid

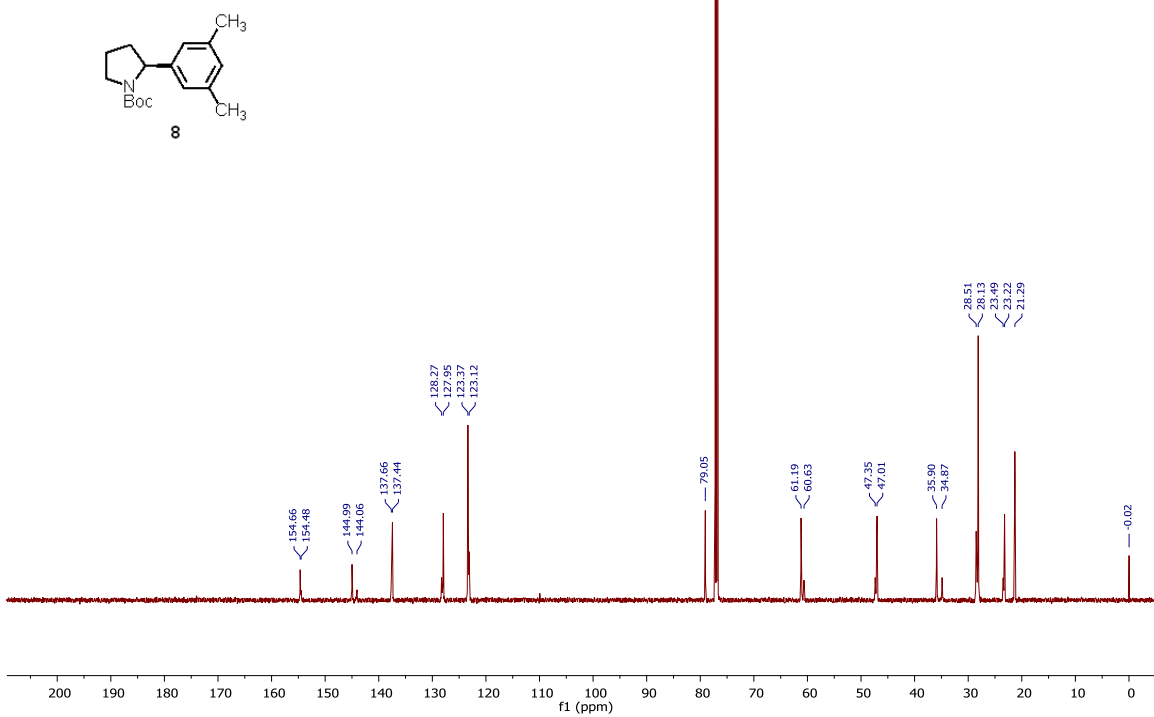

## References and Notes:

- 1 M. Klusmann, L. Ratjen, S. Hoffmann, V. Wakchaure, R. Goddard, B. List, *Synlett* **14**, 2189-2192 (2010).
- 2 S. Kashikura, K. Mori, T. Akiyama, , *Org. Lett.* **13**, 1860–1863 (2011).
- 3 F. R-. Michailidis, L. Guenee, A. Alexakis, *Org. Lett.* **15**, 5890–5893 (2013).
- 4 S. S. Zhu, D. R. Cefalo, D. S. La, J. Y. Jamieson, W. M. Davis, A. H. Hoveyda, R. R. Schrock, *J. Am. Chem. Soc.* **121**, 8251–8259 (1999).
